# Supplementary material for: Organocatalytic synthesis of chiral CF3-containing oxazolidines and 1,2-amino alcohols: asymmetric oxa-1,3-dipolar cycloaddition of trifluoroethylamine-derived azomethine ylides
Source: Royal Society of Chemistry journal article supplement (doi:10.1039/d0qo00990c), 2020-01-01
Supplement: d0qo00990c1.pdf [file d0qo00990c1.pdf]

## Supporting Information

### Organocatalytic synthesis of chiral CF<sub>3</sub>-containing oxazolidines and 1,2-amino alcohols: asymmetric *oxa*-1,3-dipolar cycloaddition of trifluoroethylamine-derived azomethine ylide

Wen-Run Zhu,<sup>a,b</sup> Qiong Su,<sup>a</sup> Ning Lin,<sup>\*,b</sup> Qing Chen,<sup>\*,b</sup> Zhen-Wei Zhang,<sup>b</sup> Jiang Weng,<sup>a</sup> and Gui Lu<sup>\*,a</sup>

<sup>a</sup> Guangdong Provincial Key Laboratory of Chiral Molecule and Drug Discovery, School of Pharmaceutical Sciences, Sun Yat-sen University, Guangzhou 510006, P. R. China.

<sup>b</sup> College of Pharmacy, Guangxi Zhuang Yao Medicine Center of Engineering and Technology, Guangxi University of Chinese Medicine, Nanning, Guangxi, 530200, P. R. China.

E-mail for N.L.: [linninginnanning@163.com](mailto:linninginnanning@163.com). E-mail for Q.C.: [qing0082@163.com](mailto:qing0082@163.com). E-mail for G.L.: [lugu@mail.sysu.edu.cn](mailto:lugu@mail.sysu.edu.cn).

## Table of Contents

|                                                                   |            |
|-------------------------------------------------------------------|------------|
| <b>1. General Information</b>                                     | <b>S3</b>  |
| <b>2. Screening of Catalysts and Condition Optimization</b>       | <b>S4</b>  |
| <b>3. Experimental Procedure and Characterization of Products</b> | <b>S5</b>  |
| a. General Procedure to Prepare Racemic Products 3a-3t, 3aa       | S5         |
| b. General Procedure to Prepare Chiral Products 3a-3t, 3aa        | S5         |
| c. Analytical Data for Products 3a-3t, 3aa                        | S5         |
| d. General Procedure to Prepare Racemic Products 3u-3z            | S14        |
| e. General Procedure to Prepare Chiral Products 3u-3z             | S14        |
| f. Analytical Data for Products 3u-3z                             | S14        |
| g. Transformation of 3a to 4a                                     | S17        |
| h. Transformation of 3y to 4y                                     | S17        |
| i. Application of oxa-1,3-DC in desymmetrization                  | S18        |
| <b>4. Proposed Reaction Mechanism</b>                             | <b>S19</b> |
| <b>5. References</b>                                              | <b>S19</b> |
| <b>6. Data for X-ray Crystal Structure of 3a</b>                  | <b>S20</b> |
| <b>7. NMR Spectra</b>                                             | <b>S21</b> |
| <b>8. HPLC Traces</b>                                             | <b>S66</b> |

## 1. General Information

All reactions were carried out in oven-dried reaction vessel unless otherwise noted and solvents were dried according to established procedures. Reactions were monitored by thin layer chromatography (TLC). Purification of reaction product was carried out by flash chromatography using Qing Dao Sea Chemical Reagent silica gel (200-300 mesh).  $^1\text{H}$ ,  $^{13}\text{C}$  and  $^{19}\text{F}$  NMR spectra were recorded on Bruker 400 MHz or 500 MHz spectrometer in  $\text{CDCl}_3$  unless otherwise noted. Chemical shifts in  $^1\text{H}$  NMR spectra are reported in parts per million (ppm,  $\delta$ ) downfield from the internal standard  $\text{Me}_4\text{Si}$  (TMS,  $\delta = 0$  ppm). Chemical shifts in  $^{13}\text{C}$  NMR spectra are reported relative to the central line of the chloroform signal ( $\delta = 77.0$  ppm). Data are presented as follows: chemical shift, integration, multiplicity (s = singlet, d = doublet, t = triplet, q = quartet, m = multiplet) and coupling constant in Hertz (Hz). HPLC analyses were conducted on an Agilent instrument using a Daicel Chiralpak IA, IB, IC and AD-H column. High resolution mass spectra were obtained with a Shimadzu LCMS-IT-TOF mass spectrometer. The single crystal X-ray diffraction studies were carried out on a Xcalibur Onyx Nova diffractometer equipped with  $\text{CuK}\alpha$  radiation.

Substrates **2**,<sup>1a</sup> **5**,<sup>1b</sup> and **7**<sup>1b</sup> were synthesized according to the literature method.

## 2. Screening of Catalysts and Condition Optimization

**Table S1.** Screening of catalysts and optimization of reaction conditions<sup>[a]</sup>

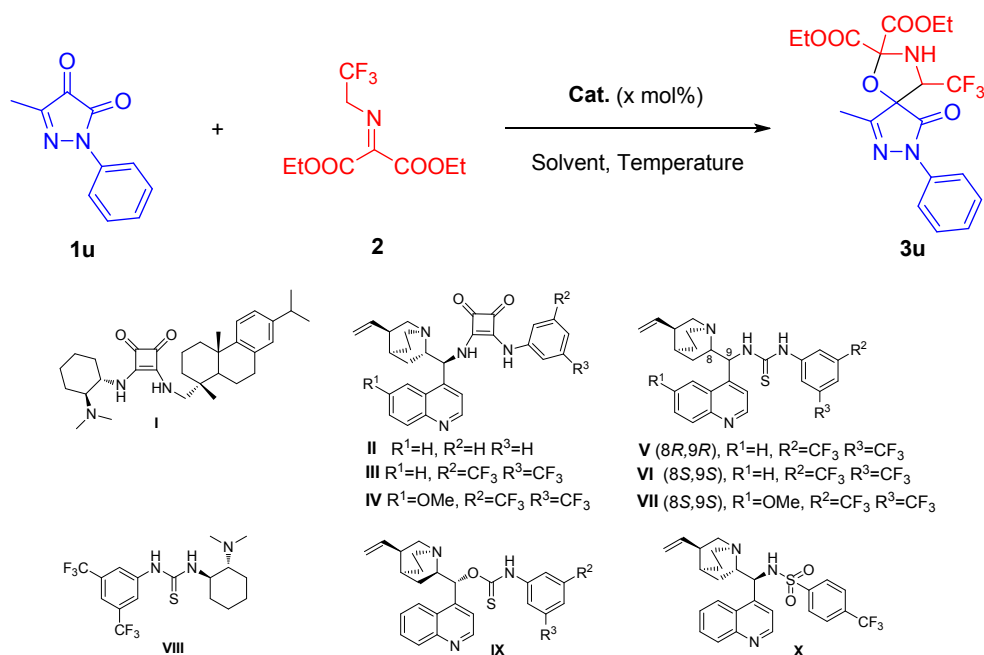

| Entry             | Catalyst<br>(x mol%) | Solvent<br>(x mL)     | Temperature<br>[°C] | Time      | Yield <sup>[b]</sup><br>[%] | <i>d</i> <sup>[c]</sup> | <i>ee</i> <sup>[d]</sup> |
|-------------------|----------------------|-----------------------|---------------------|-----------|-----------------------------|-------------------------|--------------------------|
| 1                 | <b>I</b> (10)        | DCM (1)               | 35                  | 1h        | 99                          | >20:1                   | 15                       |
| 2                 | <b>II</b> (10)       | DCM (1)               | 35                  | <5min     | 96                          | >20:1                   | 5                        |
| 3                 | <b>III</b> (10)      | DCM (1)               | 35                  | 1.5h      | 96                          | >20:1                   | 18                       |
| 4                 | <b>IV</b> (10)       | DCM (1)               | 35                  | 2h        | 96                          | >20:1                   | 19                       |
| 5                 | <b>V</b> (10)        | DCM (1)               | 35                  | <30min    | 96                          | >20:1                   | 82                       |
| 6                 | <b>VI</b> (10)       | DCM (1)               | 35                  | 40min     | 96                          | >20:1                   | -75                      |
| 7                 | <b>VII</b> (10)      | DCM (1)               | 35                  | <30min    | 96                          | >20:1                   | -55                      |
| 8                 | <b>VIII</b> (10)     | DCM (1)               | 35                  | 40min     | 92                          | >20:1                   | 60                       |
| 9                 | <b>IX</b> (10)       | DCM (1)               | 35                  | 2h        | 96                          | >20:1                   | 76                       |
| 10                | <b>X</b> (10)        | DCM (1)               | 35                  | 24h       | 90                          | >20:1                   | 84                       |
| 11                | <b>V</b> (10)        | DCE (1)               | 35                  | <30min    | 96                          | >20:1                   | 72                       |
| 12                | <b>V</b> (10)        | CHCl <sub>3</sub> (1) | 35                  | <30min    | 96                          | >20:1                   | 70                       |
| 13                | <b>V</b> (10)        | THF (1)               | 35                  | <30min    | 96                          | >20:1                   | 78                       |
| 14                | <b>V</b> (10)        | Toluene (1)           | 35                  | <30min    | 96                          | >20:1                   | 45                       |
| 15                | <b>V</b> (10)        | MeOH (1)              | 35                  | <30min    | 90                          | 1:8                     | 0                        |
| 16                | <b>V</b> (10)        | MeCN (1)              | 35                  | <30min    | 90                          | >20:1                   | 70                       |
| 17                | <b>V</b> (10)        | MTBE (1)              | 35                  | <30min    | 96                          | >20:1                   | 75                       |
| 18                | <b>V</b> (10)        | DCM (1)               | -20                 | 72h       | 68                          | >20:1                   | 63                       |
| 19                | <b>V</b> (10)        | DCM (1)               | 0                   | 72h       | 82                          | >20:1                   | 81                       |
| 20                | <b>V</b> (10)        | DCM (1)               | 10                  | 36h       | 92                          | >20:1                   | 82                       |
| 21                | <b>V</b> (10)        | DCM (1)               | 25                  | 30min     | 98                          | >20:1                   | 84                       |
| 22                | <b>V</b> (5)         | DCM (1)               | 25                  | 30min     | 98                          | >20:1                   | 68                       |
| 23                | <b>V</b> (20)        | DCM (1)               | 25                  | <30min    | 98                          | >20:1                   | 82                       |
| 24                | <b>V</b> (10)        | DCM (3)               | 25                  | 1h        | 98                          | >20:1                   | 88                       |
| <b>25</b>         | <b>V (10)</b>        | <b>DCM (5)</b>        | <b>25</b>           | <b>1h</b> | <b>98</b>                   | >20:1                   | <b>90</b>                |
| 26 <sup>[e]</sup> | <b>V</b> (10)        | DCM (5)               | 25                  | 4h        | 98                          | >20:1                   | 46                       |

<sup>a</sup>Unless otherwise specified, all reactions were carried out with catalyst (x mol%), **1u** (0.10 mmol) and **2** (0.15 mmol) in the indicated solvent (x mL) at 35 °C. [b] Isolated yield of **3u**. [c] Determined by <sup>1</sup>H NMR analysis of the crude product. [d] Determined by chiral-phase HPLC analysis. [e] 50 mg 4Å was used.



### 3. Experimental Procedure and Characterization of Products

#### a. General Procedure to Prepare Racemic Products 3a-3t, 3aa

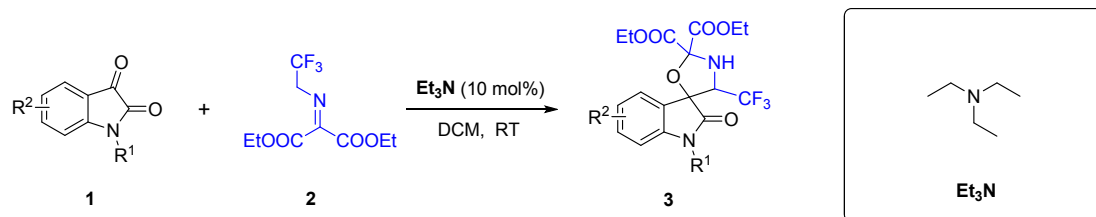

To a solution of diethyl 2-((2,2,2-trifluoroethyl)imino)malonate **2** (0.15 mmol, 1.5 equiv.), and catalyst Et<sub>3</sub>N (0.01 mmol, 10 mol%) in DCM (1 mL) was added isatin **1** (0.10 mmol, 1.0 equiv.). The mixture was stirred at room temperature until the reaction was completed (monitored by TLC analysis). The crude product was purified directly by flash column chromatography on silica gel (petroleum ether/ ethyl acetate = 8:1~3:1) to give the desired racemic products **3a-3t, 3aa**.

#### b. General Procedure to Prepare Chiral Products 3a-3t, 3aa

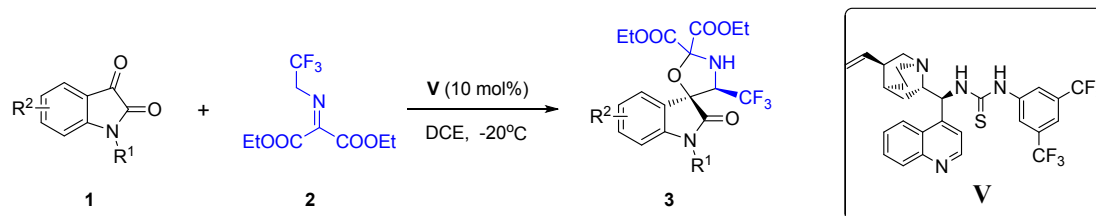

To a solution of diethyl 2-((2,2,2-trifluoroethyl)imino)malonate **2** (0.15 mmol, 1.5 equiv.) and catalyst **V** (0.01 mmol, 10 mol%) in DCE (1 mL) was added isatin **1** (0.10 mmol, 1.0 equiv.). The mixture was stirred at -20 °C until the reaction was completed (monitored by TLC analysis). The crude product was purified directly by flash column chromatography on silica gel (petroleum ether/ ethyl acetate = 8:1~3:1) to give the desired chiral products **3a-3t, 3aa**.

#### c. Analytical Data for Products 3a-3t, 3aa

(3*S*,4'*R*)-diethyl 1-methyl-2-oxo-4'-(trifluoromethyl)spiro[indoline-3,5'-oxazolidine]-2',2'-dicarboxylate (**3a**): petroleum ether/ ethyl acetate = 3:1, R<sub>f</sub>=0.6.

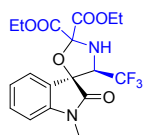

White solid, 95% yield, >20:1 *dr*, 96% *ee*, [ $\alpha$ ]<sub>D</sub><sup>20</sup> = +40.12 (*c* = 0.42, MeOH).

**<sup>1</sup>H NMR** (400 MHz, CDCl<sub>3</sub>)  $\delta$ : 7.60 (dd, *J* = 7.4, 0.6 Hz, 1H), 7.38 (td, *J* = 7.8, 1.2 Hz, 1H), 7.14 (t, *J* = 7.2 Hz, 1H), 6.82 (d, *J* = 7.8 Hz, 1H), 4.67 (d, *J* = 13.6 Hz, 1H), 4.51-4.38 (m, 2H), 4.37-4.26 (m, 3H), 3.15 (s, 3H), 1.34 (dt, *J* = 8.8, 7.1 Hz, 6H);

**<sup>13</sup>C NMR** (101 MHz, CDCl<sub>3</sub>)  $\delta$ : 172.82, 167.43, 165.26, 144.64, 131.33, 124.84, 123.70, 123.68, 122.51 (q, *J* = 279.6 Hz), 108.87, 94.32, 81.25, 67.66 (q, *J* = 31.3 Hz), 63.28, 63.07, 26.43, 14.07, 14.04;

**<sup>19</sup>F NMR** (376 MHz, CDCl<sub>3</sub>)  $\delta$ : -69.09.

**HRMS** (ESI):  $m/z$  calcd. for  $C_{18}H_{20}N_2O_6F_3$   $[M+H]^+$ : 417.1268; found: 417.1264.

**HPLC analysis:** The enantiomeric excess was determined by HPLC with Chiralpak IA column (hexane/*i*-PrOH = 90/10, flow rate 1.0 mL·min<sup>-1</sup>,  $\lambda$  = 254 nm):  $t_{major}$  = 6.4 min,  $t_{minor}$  = 7.5 min.

(3*S*,4'*R*)-diethyl 5-fluoro-1-methyl-2-oxo-4'-(trifluoromethyl)spiro[indoline-3,5'-oxazolidine]-2',2'-dicarboxylate (**3b**): petroleum ether/ ethyl acetate = 3:1, R<sub>f</sub>=0.6.

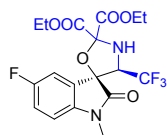

Light yellow oil, 97% yield, >20:1 *dr*, 94% *ee*,  $[\alpha]_D^{20}$  = +52.38 ( $c$  = 0.37, MeOH).

**<sup>1</sup>H NMR** (400 MHz, CDCl<sub>3</sub>)  $\delta$ : 7.40 (dd,  $J$  = 7.4, 2.6 Hz, 1H), 7.08 (td,  $J$  = 8.8, 2.6 Hz, 1H), 6.76 (dd,  $J$  = 8.5, 3.9 Hz, 1H), 4.66 (d,  $J$  = 13.7 Hz, 1H), 4.51-4.37 (m, 2H), 4.36-4.24 (m, 3H), 3.14 (s, 3H), 1.34 (dt,  $J$  = 9.8, 7.1 Hz, 6H);

**<sup>13</sup>C NMR** (101 MHz, CDCl<sub>3</sub>)  $\delta$ : 172.61, 167.28, 165.01, 159.70 (d,  $J$  = 243.0 Hz), 140.57 (d,  $J$  = 2.1 Hz), 125.46 (d,  $J$  = 8.2 Hz), 122.40 (q,  $J$  = 279.5 Hz), 117.63 (d,  $J$  = 23.7 Hz), 113.18 (d,  $J$  = 25.5 Hz), 109.61 (d,  $J$  = 7.9 Hz), 94.51, 81.09, 67.91 (q,  $J$  = 31.6 Hz), 63.38, 63.20, 26.59, 14.06, 14.04;

**<sup>19</sup>F NMR** (376 MHz, CDCl<sub>3</sub>)  $\delta$ : -69.09, -118.71.

**HRMS** (ESI):  $m/z$  calcd. for  $C_{18}H_{19}N_2O_6F_4$   $[M+H]^+$ : 435.1174; found: 435.1169.

**HPLC analysis:** The enantiomeric excess was determined by HPLC with Chiralpak IA column (hexane/*i*-PrOH = 95/5, 1 mL·min<sup>-1</sup>,  $\lambda$  = 254 nm):  $t_{major}$  = 8.2 min,  $t_{minor}$  = 10.9 min.

(3*S*,4'*R*)-diethyl 5-chloro-1-methyl-2-oxo-4'-(trifluoromethyl)spiro[indoline-3,5'-oxazolidine]-2',2'-dicarboxylate (**3c**): petroleum ether/ ethyl acetate = 3:1, R<sub>f</sub>=0.6.

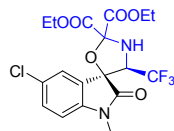

Colorless oil, 92% yield, >20:1 *dr*, 95% *ee*,  $[\alpha]_D^{20}$  = +70.02 ( $c$  = 0.40, MeOH).

**<sup>1</sup>H NMR** (400 MHz, CDCl<sub>3</sub>)  $\delta$ : 7.61 (d,  $J$  = 2.1 Hz, 1H), 7.35 (dd,  $J$  = 8.3, 2.1 Hz, 1H), 6.76 (d,  $J$  = 8.3 Hz, 1H), 4.65 (d,  $J$  = 13.7 Hz, 1H), 4.50-4.37 (m, 2H), 4.36-4.24 (m, 3H), 3.13 (s, 3H), 1.34 (dt,  $J$  = 13.9, 7.1 Hz, 6H);

**<sup>13</sup>C NMR** (101 MHz, CDCl<sub>3</sub>)  $\delta$ : 172.42, 167.23, 164.98, 143.16, 131.24, 129.15, 125.51, 125.43, 122.38 (q,  $J$  = 279.6 Hz), 109.91, 94.50, 80.91, 67.87 (q,  $J$  = 31.6 Hz), 63.38, 63.23, 26.57, 14.05, 14.02;

**<sup>19</sup>F NMR** (376 MHz, CDCl<sub>3</sub>)  $\delta$ : -69.04.

**HRMS** (ESI):  $m/z$  calcd. for  $C_{18}H_{19}ClN_2O_6F_3$   $[M+H]^+$ : 451.0878; found: 451.0873.

**HPLC analysis:** The enantiomeric excess was determined by HPLC with Chiralpak IA column (hexane/*i*-PrOH = 95/5, 1 mL·min<sup>-1</sup>,  $\lambda$  = 254 nm):  $t_{major}$  = 8.4 min,  $t_{minor}$  = 10.3 min.

(3*S*,4'*R*)-diethyl 5-bromo-1-methyl-2-oxo-4'-(trifluoromethyl)spiro[indoline-3,5'-oxazolidine]-2',2'-dicarboxylate (**3d**): petroleum ether/ ethyl acetate = 3:1, R<sub>f</sub>=0.6.

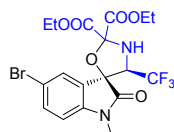

Yellow solid, 95% yield, >20:1 *dr*, 95% *ee*,  $[\alpha]_D^{20}$  = +77.26 ( $c$  = 0.28, MeOH).

**<sup>1</sup>H NMR** (500 MHz, CDCl<sub>3</sub>)  $\delta$ : 7.75 (s, 1H), 7.51 (d,  $J$  = 8.0 Hz, 1H), 6.71 (d,  $J$  = 8.1 Hz, 1H), 4.65 (d,  $J$  = 13.6

Hz, 1H), 4.50-4.38 (m, 2H), 4.37-4.25 (m, 3H), 3.14 (s, 3H), 1.40-1.29 (m, 6H);

**<sup>13</sup>C NMR** (126 MHz, CDCl<sub>3</sub>) δ: 172.33, 167.24, 164.99, 143.70, 134.17, 128.19, 125.86, 122.40 (q, *J* = 279.6 Hz), 116.30, 110.35, 94.53, 80.88, 67.92 (q, *J* = 31.5 Hz), 63.39, 63.24, 26.57, 14.08, 14.04;

**<sup>19</sup>F NMR** (471 MHz, CDCl<sub>3</sub>) δ: -69.01.

**HRMS** (ESI): *m/z* calcd. for C<sub>18</sub>H<sub>19</sub>BrN<sub>2</sub>O<sub>6</sub>F<sub>3</sub> [M+H]<sup>+</sup>: 495.0373; found: 495.0363.

**HPLC analysis:** The enantiomeric excess was determined by HPLC with Chiralpak IA column (hexane/*i*-PrOH = 90/10, 0.8 mL·min<sup>-1</sup>, λ = 254 nm): *t*<sub>major</sub> = 8.1 min, *t*<sub>minor</sub> = 9.3 min.

(3*S*,4'*R*)-diethyl 1-methyl-2-oxo-5-(trifluoromethoxy)-4'-(trifluoromethyl)spiro[indoline-3,5'-oxazolidine]-2',2'-dicarboxylate (**3e**): petroleum ether/ ethyl acetate = 3:1, R<sub>f</sub>=0.3.

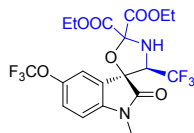

colourless foam, 98% yield, >20:1 *dr*, 93% *ee*, [*a*]<sub>D</sub><sup>20</sup> = +44.49 (c = 0.45, MeOH).

**<sup>1</sup>H NMR** (400 MHz, CDCl<sub>3</sub>) δ: 7.53 (d, *J* = 1.7 Hz, 1H), 7.26 (dd, *J* = 8.5, 1.5 Hz, 1H), 6.83 (d, *J* = 8.5 Hz, 1H), 4.66 (d, *J* = 13.7 Hz, 1H), 4.52-4.37 (m, 2H), 4.32 (tdd, *J* = 10.2, 6.9, 3.3 Hz, 3H), 3.16 (s, 3H), 1.34 (dt, *J* = 9.4, 7.1 Hz, 6H);

**<sup>13</sup>C NMR** (126 MHz, CDCl<sub>3</sub>) δ: 172.69, 167.17, 165.01, 145.45, 143.24, 125.47, 124.38, 122.37 (q, *J* = 279.4 Hz), 120.59 (q, *J* = 257.1 Hz), 118.98, 109.52, 94.59, 80.94, 67.98 (q, *J* = 31.7 Hz), 63.45, 63.26, 26.64, 14.04;

**<sup>19</sup>F NMR** (376 MHz, CDCl<sub>3</sub>) δ: -58.35, -69.10.

**HRMS** (ESI): *m/z* calcd. for C<sub>19</sub>H<sub>19</sub>N<sub>2</sub>O<sub>7</sub>F<sub>6</sub> [M+H]<sup>+</sup>: 501.1092; found: 501.1096.

**HPLC analysis:** The enantiomeric excess was determined by HPLC with Chiralpak IB column (hexane/*i*-PrOH = 95/5, 1 mL·min<sup>-1</sup>, λ = 254 nm): *t*<sub>major</sub> = 7.0 min, *t*<sub>minor</sub> = 13.8 min.

(3*S*,4'*R*)-diethyl 5-methoxy-1-methyl-2-oxo-4'-(trifluoromethyl)spiro[indoline-3,5'-oxazolidine]-2',2'-dicarboxylate (**3f**): petroleum ether/ ethyl acetate = 8:1, R<sub>f</sub>=0.3.

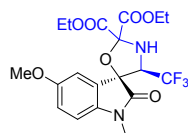

colourless foam, 92% yield, >20:1 *dr*, 97% *ee*, [*a*]<sub>D</sub><sup>20</sup> = +75.65 (c = 0.37, MeOH).

**<sup>1</sup>H NMR** (400 MHz, CDCl<sub>3</sub>) δ: 7.23 (d, *J* = 2.6 Hz, 1H), 6.89 (dd, *J* = 8.5, 2.6 Hz, 1H), 6.73 (d, *J* = 8.5 Hz, 1H), 4.67 (d, *J* = 13.7 Hz, 1H), 4.51-4.38 (m, 2H), 4.35-4.23 (m, 3H), 3.81 (s, 3H), 3.12 (s, 3H), 1.34 (dt, *J* = 10.1, 7.1 Hz, 6H);

**<sup>13</sup>C NMR** (101 MHz, CDCl<sub>3</sub>) δ: 172.59, 167.41, 165.21, 156.76, 137.92, 124.89, 122.50 (q, *J* = 279.5 Hz), 115.95, 111.70, 109.46, 94.38, 81.47, 67.84 (q, *J* = 31.4 Hz), 63.27, 63.06, 55.97, 26.51, 14.09, 14.04;

**<sup>19</sup>F NMR** (376 MHz, CDCl<sub>3</sub>) δ: -69.08.

**HRMS** (ESI): *m/z* calcd. for C<sub>19</sub>H<sub>22</sub>N<sub>2</sub>O<sub>7</sub>F<sub>3</sub> [M+H]<sup>+</sup>: 447.1374; found: 447.1368.

**HPLC analysis:** The enantiomeric excess was determined by HPLC with Chiralpak IA column (hexane/*i*-PrOH = 95/5, 1 mL·min<sup>-1</sup>, λ = 254 nm): *t*<sub>major</sub> = 11.2 min, *t*<sub>minor</sub> = 21.0 min.

(3*S*,4'*R*)-diethyl 1,5-dimethyl-2-oxo-4'-(trifluoromethyl)spiro[indoline-3,5'-oxazolidine]-2',2'-dicarboxylate (**3g**): petroleum ether/ ethyl acetate = 3:1, R<sub>f</sub>=0.5.

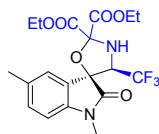

colourless foam, 90% yield, >20:1 *dr*, 96% *ee*,  $[\alpha]_D^{20} = +67.31$  (*c* = 0.35, MeOH).

**<sup>1</sup>H NMR** (400 MHz, CDCl<sub>3</sub>)  $\delta$ : 7.40 (s, 1H), 7.16 (d, *J* = 8.6 Hz, 1H), 6.70 (d, *J* = 7.9 Hz, 1H), 4.68 (d, *J* = 13.7 Hz, 1H), 4.49-4.38 (m, 2H), 4.37-4.24 (m, 3H), 3.12 (s, 3H), 2.35 (s, 3H), 1.33 (dt, *J* = 14.1, 7.1 Hz, 6H);

**<sup>13</sup>C NMR** (101 MHz, CDCl<sub>3</sub>)  $\delta$ : 172.77, 167.53, 165.25, 142.26, 133.41, 131.56, 125.49, 123.59, 122.53 (q, *J* = 279.6 Hz), 108.65, 94.25, 81.36, 67.61 (q, *J* = 31.3 Hz), 63.22, 63.05, 26.43, 21.16, 14.06, 14.03;

**<sup>19</sup>F NMR** (376 MHz, CDCl<sub>3</sub>)  $\delta$ : -69.07.

**HRMS** (ESI): *m/z* calcd. for C<sub>19</sub>H<sub>22</sub>N<sub>2</sub>O<sub>6</sub>F<sub>3</sub> [M+H]<sup>+</sup>: 431.1424; found: 431.1423.

**HPLC analysis:** The enantiomeric excess was determined by HPLC with Chiralpak IA column (hexane/*i*-PrOH = 90/10, 1 mL·min<sup>-1</sup>,  $\lambda$  = 254 nm): *t*<sub>major</sub> = 5.7 min, *t*<sub>minor</sub> = 6.6 min.

(3*S*,4'*R*)-diethyl 4-fluoro-1-methyl-2-oxo-4'-(trifluoromethyl)spiro[indoline-3,5'-oxazolidine]-2',2'-dicarboxylate (**3h**): petroleum ether/ ethyl acetate = 8:1, R<sub>f</sub>=0.5.

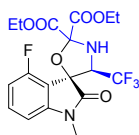

colourless foam, 95% yield, >20:1 *dr*, 95% *ee*,  $[\alpha]_D^{20} = +56.36$  (*c* = 0.28, MeOH).

**<sup>1</sup>H NMR** (400 MHz, CDCl<sub>3</sub>)  $\delta$ : 7.37 (td, *J* = 8.2, 5.5 Hz, 1H), 6.79 (t, *J* = 8.8 Hz, 1H), 6.64 (d, *J* = 7.8 Hz, 1H), 4.74-4.62 (m, 2H), 4.47-4.39 (m, 1H), 4.38-4.26 (m, 3H), 3.13 (s, 3H), 1.33 (td, *J* = 7.1, 2.4 Hz, 6H);

**<sup>13</sup>C NMR** (126 MHz, CDCl<sub>3</sub>)  $\delta$ : 171.95, 166.78, 165.54, 159.80 (d, *J* = 253.7 Hz), 146.65 (d, *J* = 7.6 Hz), 133.64 (d, *J* = 9.0 Hz), 122.46 (q, *J* = 279.5 Hz), 111.47 (d, *J* = 20.3 Hz), 108.45 (d, *J* = 18.2 Hz), 105.16 (d, *J* = 3.2 Hz), 94.66, 80.77, 64.50 (qd, *J* = 31.5, 1.1 Hz), 63.26, 63.03, 26.79, 14.02, 13.94;

**<sup>19</sup>F NMR** (376 MHz, CDCl<sub>3</sub>)  $\delta$ : -69.13, -116.81.

**HRMS** (ESI): *m/z* calcd. for C<sub>18</sub>H<sub>19</sub>N<sub>2</sub>O<sub>6</sub>F<sub>4</sub> [M+H]<sup>+</sup>: 435.1174; found: 435.1180.

**HPLC analysis:** The enantiomeric excess was determined by HPLC with Chiralpak IB column (hexane/*i*-PrOH = 95/5, 1 mL·min<sup>-1</sup>,  $\lambda$  = 254 nm): *t*<sub>major</sub> = 11.8 min, *t*<sub>minor</sub> = 22.3 min.

(3*S*,4'*R*)-diethyl 4-chloro-1-methyl-2-oxo-4'-(trifluoromethyl)spiro[indoline-3,5'-oxazolidine]-2',2'-dicarboxylate (**3i**): petroleum ether/ ethyl acetate = 8:1, R<sub>f</sub>=0.6.

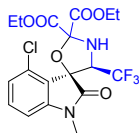

colourless foam, 88% yield, >20:1 *dr*, 95% *ee*,  $[\alpha]_D^{20} = +40.36$  (*c* = 0.45, MeOH).

**<sup>1</sup>H NMR** (400 MHz, CDCl<sub>3</sub>)  $\delta$ : 7.31 (t, *J* = 8.1 Hz, 1H), 7.04 (d, *J* = 8.2 Hz, 1H), 6.73 (d, *J* = 7.8 Hz, 1H), 5.00 (dq, *J* = 13.8, 6.9 Hz, 1H), 4.60 (d, *J* = 12.9 Hz, 1H), 4.45-4.27 (m, 4H), 3.13 (s, 3H), 1.32 (td, *J* = 7.1, 5.1 Hz, 6H);

**<sup>13</sup>C NMR** (101 MHz, CDCl<sub>3</sub>)  $\delta$ : 171.90, 166.36, 165.74, 146.60, 132.66, 132.24, 124.86, 122.46 (q, *J* = 279.5 Hz), 118.66, 107.54, 94.88, 81.79, 63.22, 63.01, 63.00 (q, *J* = 31.5 Hz), 26.60, 14.07;

**<sup>19</sup>F NMR** (376 MHz, CDCl<sub>3</sub>)  $\delta$ : -69.16.

**HRMS** (ESI): *m/z* calcd. for C<sub>18</sub>H<sub>19</sub>ClN<sub>2</sub>O<sub>6</sub>F<sub>3</sub> [M+H]<sup>+</sup>: 451.0878; found: 451.0870.

**HPLC analysis:** The enantiomeric excess was determined by HPLC with Chiralpak IB column (hexane/*i*-PrOH = 99/1, 1 mL·min<sup>-1</sup>, λ = 254 nm): *t*<sub>major</sub> = 28.4 min, *t*<sub>minor</sub> = 55.2 min.

(3*S*,4'*R*)-diethyl 6-chloro-1-methyl-2-oxo-4'-(trifluoromethyl)spiro[indoline-3,5'-oxazolidine]-2',2'-dicarboxylate (**3j**): petroleum ether/ ethyl acetate = 3:1, R<sub>f</sub>=0.4.

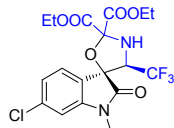

colourless foam, 93% yield, >20:1 *dr*, 95% *ee*, [ $\alpha$ ]<sub>D</sub><sup>20</sup> = +43.76 (c = 0.38, MeOH).

**<sup>1</sup>H NMR** (400 MHz, CDCl<sub>3</sub>) δ: 7.54 (d, *J* = 8.0 Hz, 1H), 7.11 (dd, *J* = 8.0, 1.7 Hz, 1H), 6.83 (d, *J* = 1.7 Hz, 1H), 4.64 (d, *J* = 13.7 Hz, 1H), 4.51-4.37 (m, 2H), 4.36-4.23 (m, 3H), 3.13 (s, 3H), 1.33 (dd, *J* = 13.5, 7.1 Hz, 6H);

**<sup>13</sup>C NMR** (101 MHz, CDCl<sub>3</sub>) δ: 172.77, 167.31, 165.05, 145.79, 137.32, 125.93, 123.58, 122.42 (q, *J* = 279.4 Hz), 122.21, 109.75, 94.39, 80.81, 67.71 (q, *J* = 31.5 Hz), 63.37, 63.15, 26.57, 14.06, 14.04;

**<sup>19</sup>F NMR** (376 MHz, CDCl<sub>3</sub>) δ: -69.06.

**HRMS** (ESI): *m/z* calcd. for C<sub>18</sub>H<sub>19</sub>ClN<sub>2</sub>O<sub>6</sub>F<sub>3</sub> [M+H]<sup>+</sup>: 451.0878; found: 451.0873.

**HPLC analysis:** The enantiomeric excess was determined by HPLC with Chiralpak IB column (hexane/*i*-PrOH = 99/1, 1 mL·min<sup>-1</sup>, λ = 254 nm): *t*<sub>major</sub> = 15.0 min, *t*<sub>minor</sub> = 43.8 min.

(3*S*,4'*R*)-diethyl 6-bromo-1-methyl-2-oxo-4'-(trifluoromethyl)spiro[indoline-3,5'-oxazolidine]-2',2'-dicarboxylate (**3k**): petroleum ether/ ethyl acetate = 3:1, R<sub>f</sub>=0.5.

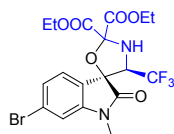

colourless oil, 98% yield, >20:1 *dr*, 94% *ee*, [ $\alpha$ ]<sub>D</sub><sup>20</sup> = +32.65 (c = 0.37, MeOH).

**<sup>1</sup>H NMR** (400 MHz, CDCl<sub>3</sub>) δ: 7.48 (d, *J* = 7.9 Hz, 1H), 7.28 (dd, *J* = 7.9, 1.6 Hz, 1H), 6.98 (d, *J* = 1.6 Hz, 1H), 4.65 (d, *J* = 13.7 Hz, 1H), 4.51-4.37 (m, 2H), 4.37-4.23 (m, 3H), 3.13 (s, 3H), 1.34 (dd, *J* = 13.2, 7.1 Hz, 6H);

**<sup>13</sup>C NMR** (126 MHz, CDCl<sub>3</sub>) δ: 172.67, 167.32, 165.05, 145.85, 126.57, 126.22, 125.25, 122.79, 122.43 (q, *J* = 281.0 Hz), 112.54, 94.42, 80.87, 67.70 (q, *J* = 31.4 Hz), 63.39, 63.18, 26.59, 14.07, 14.06;

**<sup>19</sup>F NMR** (376 MHz, CDCl<sub>3</sub>) δ: -69.04.

**HRMS** (ESI): *m/z* calcd. for C<sub>18</sub>H<sub>19</sub>BrN<sub>2</sub>O<sub>6</sub>F<sub>3</sub> [M+H]<sup>+</sup>: 495.0373; found: 495.0366.

**HPLC analysis:** The enantiomeric excess was determined by HPLC with Chiralpak IB column (hexane/*i*-PrOH = 95/5, 1 mL·min<sup>-1</sup>, λ = 280 nm): *t*<sub>major</sub> = 9.5 min, *t*<sub>minor</sub> = 20.5 min.

(3*S*,4'*R*)-diethyl 7-fluoro-1-methyl-2-oxo-4'-(trifluoromethyl)spiro[indoline-3,5'-oxazolidine]-2',2'-dicarboxylate (**3l**): petroleum ether/ ethyl acetate = 8:1, R<sub>f</sub>=0.3.

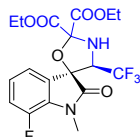

colourless oil, 93% yield, >20:1 *dr*, 96% *ee*, [ $\alpha$ ]<sub>D</sub><sup>20</sup> = +49.03 (c = 0.32, MeOH).

**<sup>1</sup>H NMR** (400 MHz, CDCl<sub>3</sub>) δ: 7.43 (dd, *J* = 6.9, 1.4 Hz, 1H), 7.15-7.04 (m, 2H), 4.67 (d, *J* = 13.7 Hz, 1H), 4.51-4.38 (m, 2H), 4.38-4.24 (m, 3H), 3.36 (d, *J* = 2.6 Hz, 3H), 1.34 (dd, *J* = 13.5, 7.0 Hz, 6H);

**<sup>13</sup>C NMR** (101 MHz, CDCl<sub>3</sub>) δ: 172.54, 167.32, 165.09, 147.78 (d, *J* = 244.9 Hz), 131.12 (d, *J* = 9.1 Hz), 126.62 (d, *J* = 3.2 Hz), 124.42 (d, *J* = 6.3 Hz), 122.42 (q, *J* = 280.5 Hz), 120.82 (d, *J* = 3.2 Hz), 119.40 (d, *J* =

19.2 Hz), 94.46, 81.00, 68.03 (q,  $J = 31.6$  Hz), 63.37, 63.15, 29.03 (d,  $J = 5.5$  Hz), 14.07;

**$^{19}\text{F}$  NMR** (376 MHz,  $\text{CDCl}_3$ )  $\delta$ : -69.08, -135.67.

**HRMS** (ESI):  $m/z$  calcd. for  $\text{C}_{18}\text{H}_{19}\text{N}_2\text{O}_6\text{F}_4$   $[\text{M}+\text{H}]^+$ : 435.1174; found: 435.1172.

**HPLC analysis:** The enantiomeric excess was determined by HPLC with Chiralpak IB column (hexane/*i*-PrOH = 95/5, 1 mL·min $^{-1}$ ,  $\lambda = 220$  nm):  $t_{\text{major}} = 6.2$  min,  $t_{\text{minor}} = 11.1$  min.

(3*S*,4'*R*)-diethyl 1,7-dimethyl-2-oxo-4'-(trifluoromethyl)spiro[indoline-3,5'-oxazolidine]-2',2'-dicarboxylate (**3m**): petroleum ether/ ethyl acetate = 8:1, Rf=0.3.

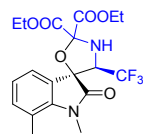

colourless foam, 98% yield, >20:1 *dr*, 95% *ee*,  $[\alpha]_D^{20} = +37.33$  ( $c = 0.15$ , MeOH).

**$^1\text{H}$  NMR** (400 MHz,  $\text{CDCl}_3$ )  $\delta$ : 7.44 (d,  $J = 7.2$  Hz, 1H), 7.10 (d,  $J = 7.7$  Hz, 1H), 7.01 (t,  $J = 7.5$  Hz, 1H), 4.68 (d,  $J = 13.6$  Hz, 1H), 4.49-4.36 (m, 2H), 4.36-4.21 (m, 3H), 3.40 (s, 3H), 2.52 (s, 3H), 1.33 (dd,  $J = 15.4, 7.2$  Hz, 6H);

**$^{13}\text{C}$  NMR** (126 MHz,  $\text{CDCl}_3$ )  $\delta$ : 173.60, 167.48, 165.36, 142.24, 135.03, 124.28, 123.60, 122.74, 122.53 (q,  $J = 279.6$  Hz), 120.56, 94.16, 80.81, 67.85 (q,  $J = 31.3$  Hz), 63.20, 63.00, 29.79, 18.88, 14.05, 14.03;

**$^{19}\text{F}$  NMR** (376 MHz,  $\text{CDCl}_3$ )  $\delta$ : -69.11.

**HRMS** (ESI):  $m/z$  calcd. for  $\text{C}_{19}\text{H}_{22}\text{N}_2\text{O}_6\text{F}_3$   $[\text{M}+\text{H}]^+$ : 431.1424; found: 431.1422.

**HPLC analysis:** The enantiomeric excess was determined by HPLC with Chiralpak IB column (hexane/*i*-PrOH = 95/5, 1 mL·min $^{-1}$ ,  $\lambda = 254$  nm):  $t_{\text{major}} = 9.4$  min,  $t_{\text{minor}} = 20.7$  min.

(3*S*,4'*R*)-diethyl 4,6-difluoro-1-methyl-2-oxo-4'-(trifluoromethyl)spiro[indoline-3,5'-oxazolidine]-2',2'-dicarboxylate (**3n**): petroleum ether/ ethyl acetate = 3:1, Rf=0.5.

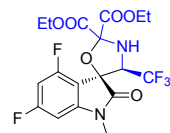

colourless oil, 93% yield, >20:1 *dr*, 93% *ee*,  $[\alpha]_D^{20} = +30.94$  ( $c = 0.35$ , MeOH).

**$^1\text{H}$  NMR** (400 MHz,  $\text{CDCl}_3$ )  $\delta$ : 6.53 (td,  $J = 9.5, 2.0$  Hz, 1H), 6.42 (dd,  $J = 8.1, 1.8$  Hz, 1H), 4.67-4.60 (m, 2H), 4.47-4.40 (m, 1H), 4.36-4.25 (m, 3H), 3.12 (s, 3H), 1.33 (t,  $J = 7.1$  Hz, 6H);

**$^{13}\text{C}$  NMR** (101 MHz,  $\text{CDCl}_3$ )  $\delta$ : 172.18, 166.70, 165.73 (dd,  $J = 252.4, 12.8$  Hz), 165.46, 160.06 (dd,  $J = 255.4, 14.6$  Hz), 147.72 (dd,  $J = 14.0, 10.0$  Hz), 122.41 (q,  $J = 279.3$  Hz), 104.18 (dd,  $J = 18.4, 3.6$  Hz), 99.20 (dd,  $J = 26.0, 24.8$  Hz), 94.67 (dd,  $J = 27.8, 3.6$  Hz), 94.59, 80.46, 64.47 (q,  $J = 31.5$  Hz), 63.37, 63.11, 26.92, 14.04, 13.96;

**$^{19}\text{F}$  NMR** (376 MHz,  $\text{CDCl}_3$ )  $\delta$ : -69.11, -102.27 (d,  $J = 9.9$  Hz), -112.76 (d,  $J = 9.9$  Hz).

**HRMS** (ESI):  $m/z$  calcd. for  $\text{C}_{18}\text{H}_{18}\text{N}_2\text{O}_6\text{F}_5$   $[\text{M}+\text{H}]^+$ : 453.1080; found: 453.1083.

**HPLC analysis:** The enantiomeric excess was determined by HPLC with Chiralpak IB column (hexane/*i*-PrOH = 95/5, 1 mL·min $^{-1}$ ,  $\lambda = 254$  nm):  $t_{\text{major}} = 8.8$  min,  $t_{\text{minor}} = 16.9$  min.

(3*S*,4'*R*)-diethyl 5-chloro-1,7-dimethyl-2-oxo-4'-(trifluoromethyl)spiro[indoline-3,5'-oxazolidine]-2',2'-dicarboxylate (**3o**): petroleum ether/ ethyl acetate = 3:1, Rf=0.4.

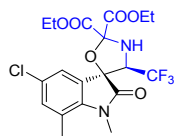

colourless oil, 97% yield, >20:1 *dr*, 96% *ee*,  $[\alpha]_D^{20} = +56.19$  ( $c = 0.37$ , MeOH).

**<sup>1</sup>H NMR** (400 MHz, CDCl<sub>3</sub>)  $\delta$ : 7.46 (d,  $J = 2.1$  Hz, 1H), 7.10 (d,  $J = 1.8$  Hz, 1H), 4.66 (d,  $J = 13.7$  Hz, 1H), 4.49–4.38 (m, 2H), 4.36–4.20 (m, 3H), 3.39 (s, 3H), 2.50 (s, 3H), 1.34 (dt,  $J = 13.5, 7.1$  Hz, 6H);

**<sup>13</sup>C NMR** (101 MHz, CDCl<sub>3</sub>)  $\delta$ : 173.27, 167.29, 165.11, 140.88, 134.51, 128.74, 126.09, 123.11, 122.39 (q,  $J = 279.6$  Hz), 122.21, 94.33, 80.52, 68.05 (q,  $J = 31.4$  Hz), 63.33, 63.20, 29.81, 18.70, 14.06, 14.03;

**<sup>19</sup>F NMR** (376 MHz, CDCl<sub>3</sub>)  $\delta$ : -69.05.

**HRMS** (ESI):  $m/z$  calcd. for C<sub>19</sub>H<sub>21</sub>ClN<sub>2</sub>O<sub>6</sub>F<sub>3</sub> [M+H]<sup>+</sup>: 465.1035; found: 465.1039.

**HPLC analysis:** The enantiomeric excess was determined by HPLC with Chiralpak IB column (hexane/*i*-PrOH = 95/5, 1 mL·min<sup>-1</sup>,  $\lambda = 254$  nm):  $t_{major} = 8.3$  min,  $t_{minor} = 20.9$  min.

(3*S*,4'*R*)-diethyl 1,5,7-trimethyl-2-oxo-4'-(trifluoromethyl)spiro[indoline-3,5'-oxazolidine]-2',2'-dicarboxylate (**3p**): petroleum ether/ ethyl acetate = 8:1, R<sub>f</sub>=0.3.

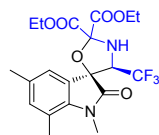

colourless oil, 91% yield, >20:1 *dr*, 98% *ee*,  $[\alpha]_D^{20} = +49.82$  ( $c = 0.38$ , MeOH).

**<sup>1</sup>H NMR** (400 MHz, CDCl<sub>3</sub>)  $\delta$ : 7.24 (s, 1H), 6.90 (s, 1H), 4.68 (d,  $J = 13.7$  Hz, 1H), 4.52–4.40 (m, 2H), 4.34–4.21 (m, 3H), 3.38 (s, 3H), 2.47 (s, 3H), 2.29 (s, 3H), 1.36–1.29 (m, 6H);

**<sup>13</sup>C NMR** (101 MHz, CDCl<sub>3</sub>)  $\delta$ : 173.56, 167.59, 165.37, 139.80, 135.47, 133.25, 124.23, 123.29, 122.55 (q,  $J = 279.6$  Hz), 120.28, 94.09, 80.95, 67.80 (q,  $J = 31.2$  Hz), 63.17, 63.02, 29.74, 20.85, 18.73, 14.06, 14.03;

**<sup>19</sup>F NMR** (376 MHz, CDCl<sub>3</sub>)  $\delta$ : -69.07.

**HRMS** (ESI):  $m/z$  calcd. for C<sub>20</sub>H<sub>24</sub>N<sub>2</sub>O<sub>6</sub>F<sub>3</sub> [M+H]<sup>+</sup>: 445.1581; found: 445.1576.

**HPLC analysis:** The enantiomeric excess was determined by HPLC with Chiralpak IB column (hexane/*i*-PrOH = 95/5, 1 mL·min<sup>-1</sup>,  $\lambda = 254$  nm):  $t_{major} = 7.4$  min,  $t_{minor} = 13.9$  min.

(3*S*,4'*R*)-diethyl 2-oxo-1-propyl-4'-(trifluoromethyl)spiro[indoline-3,5'-oxazolidine]-2',2'-dicarboxylate (**3q**): petroleum ether/ ethyl acetate = 8:1, R<sub>f</sub>=0.3.

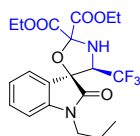

colourless oil, 98% yield, >20:1 *dr*, 97% *ee*,  $[\alpha]_D^{20} = +54.91$  ( $c = 0.11$ , MeOH).

**<sup>1</sup>H NMR** (400 MHz, CDCl<sub>3</sub>)  $\delta$ : 7.59 (d,  $J = 7.4$  Hz, 1H), 7.35 (td,  $J = 7.8, 1.0$  Hz, 1H), 7.11 (t,  $J = 7.6$  Hz, 1H), 6.83 (d,  $J = 7.9$  Hz, 1H), 4.68 (d,  $J = 13.7$  Hz, 1H), 4.50–4.38 (m, 2H), 4.38–4.24 (m, 3H), 3.73 (dt,  $J = 14.4, 7.4$  Hz, 1H), 3.43 (dt,  $J = 14.1, 7.1$  Hz, 1H), 1.71–1.60 (m, 2H), 1.33 (dt,  $J = 11.6, 7.1$  Hz, 6H), 0.93 (t,  $J = 7.4$  Hz, 3H);

**<sup>13</sup>C NMR** (101 MHz, CDCl<sub>3</sub>)  $\delta$ : 172.82, 167.45, 165.31, 144.27, 131.24, 124.95, 123.78, 123.41, 122.55 (q,  $J = 279.5$  Hz), 109.10, 94.28, 81.18, 67.67 (q,  $J = 31.3$  Hz), 63.24, 63.05, 41.97, 20.70, 14.07, 14.04, 11.28;

**<sup>19</sup>F NMR** (376 MHz, CDCl<sub>3</sub>)  $\delta$ : -68.99.

**HRMS** (ESI):  $m/z$  calcd. for C<sub>20</sub>H<sub>24</sub>N<sub>2</sub>O<sub>6</sub>F<sub>3</sub> [M+H]<sup>+</sup>: 445.1581; found: 445.1578.

**HPLC analysis:** The enantiomeric excess was determined by HPLC with Chiralpak IB column (hexane/*i*-PrOH = 95/5, 1 mL·min<sup>-1</sup>, λ = 254 nm):  $t_{major}$  = 6.2 min,  $t_{minor}$  = 9.2 min.

(3*S*,4'*R*)-diethyl 1-benzyl-2-oxo-4'-(trifluoromethyl)spiro[indoline-3,5'-oxazolidine]-2',2'-dicarboxylate (**3r**): petroleum ether/ ethyl acetate = 8:1, Rf=0.4.

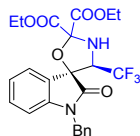

colourless foam, 92% yield, >20:1 *dr*, 96% *ee*,  $[\alpha]_D^{20}$  = +41.71 (*c* = 0.43, MeOH).

**<sup>1</sup>H NMR** (500 MHz, CDCl<sub>3</sub>) δ: 7.61 (d, *J* = 6.8 Hz, 1H), 7.30 (d, *J* = 6.0 Hz, 2H), 7.26 (s, 4H), 7.10 (t, *J* = 6.6 Hz, 1H), 6.68 (d, *J* = 7.3 Hz, 1H), 5.05 (d, *J* = 15.7 Hz, 1H), 4.73 (d, *J* = 13.6 Hz, 1H), 4.61 (d, *J* = 15.6 Hz, 1H), 4.52-4.28 (m, 5H), 1.35 (dd, *J* = 14.5, 7.1 Hz, 6H);

**<sup>13</sup>C NMR** (126 MHz, CDCl<sub>3</sub>) δ: 172.99, 167.43, 165.30, 143.90, 135.10, 131.26, 128.93, 127.92, 127.37, 124.92, 123.71, 122.40 (q, *J* = 330.4 Hz), 110.02, 94.38, 81.28, 67.69 (q, *J* = 31.4 Hz), 63.31, 63.10, 44.23, 14.09, 14.07;

**<sup>19</sup>F NMR** (471 MHz, CDCl<sub>3</sub>) δ: -68.75.

**HRMS** (ESI): *m/z* calcd. for C<sub>24</sub>H<sub>24</sub>N<sub>2</sub>O<sub>6</sub>F<sub>3</sub> [M+H]<sup>+</sup>: 493.1581; found: 493.1572.

**HPLC analysis:** The enantiomeric excess was determined by HPLC with Chiralpak IB column (hexane/*i*-PrOH = 95/5, 1 mL·min<sup>-1</sup>, λ = 220 nm):  $t_{major}$  = 8.6 min,  $t_{minor}$  = 10.5 min.

(3*S*,4'*R*)-diethyl 2-oxo-1-phenyl-4'-(trifluoromethyl)spiro[indoline-3,5'-oxazolidine]-2',2'-dicarboxylate (**3s**): petroleum ether/ ethyl acetate = 8:1, Rf=0.3.

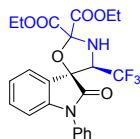

colourless foam, 90% yield, >20:1 *dr*, 94% *ee*,  $[\alpha]_D^{20}$  = +22.52 (*c* = 0.16, MeOH).

**<sup>1</sup>H NMR** (400 MHz, CDCl<sub>3</sub>) δ: 7.70 (d, *J* = 7.4 Hz, 1H), 7.50 (t, *J* = 7.6 Hz, 2H), 7.40 (t, *J* = 7.5 Hz, 1H), 7.35 (d, *J* = 7.2 Hz, 2H), 7.31 (dd, *J* = 7.8, 1.2 Hz, 1H), 7.18 (t, *J* = 7.2 Hz, 1H), 6.82 (d, *J* = 7.9 Hz, 1H), 4.73 (d, *J* = 13.7 Hz, 1H), 4.50-4.37 (m, 3H), 4.36-4.28 (m, 2H), 1.35 (dt, *J* = 19.8, 7.1 Hz, 6H);

**<sup>13</sup>C NMR** (101 MHz, CDCl<sub>3</sub>) δ: 172.30, 167.44, 165.13, 144.56, 133.53, 131.23, 129.84, 128.59, 126.28, 125.19, 124.18, 123.57, 122.67 (q, *J* = 279.4 Hz), 110.21, 94.54, 81.46, 68.32 (q, *J* = 31.3 Hz), 63.35, 63.14, 14.11, 14.06;

**<sup>19</sup>F NMR** (376 MHz, CDCl<sub>3</sub>) δ: -68.77.

**HRMS** (ESI): *m/z* calcd. for C<sub>23</sub>H<sub>22</sub>N<sub>2</sub>O<sub>6</sub>F<sub>3</sub> [M+H]<sup>+</sup>: 479.1424; found: 479.1422.

**HPLC analysis:** The enantiomeric excess was determined by HPLC with Chiralpak IA column (hexane/*i*-PrOH = 99/1, 1 mL·min<sup>-1</sup>, λ = 254 nm):  $t_{major}$  = 16.0 min,  $t_{minor}$  = 32.5 min.

(3*S*,4'*R*)-diethyl 2-oxo-4'-(trifluoromethyl)spiro[indoline-3,5'-oxazolidine]-2',2'-dicarboxylate (**3t**): petroleum ether/ ethyl acetate = 3:1, Rf=0.4.

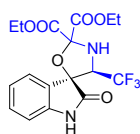

Yellow oil, 58% yield, >20:1 *dr*, 96% *ee*,  $[\alpha]_D^{20}$  = +22.37 (*c* = 0.35, MeOH).



**<sup>1</sup>H NMR** (400 MHz, CDCl<sub>3</sub>) δ: 8.14 (s, 1H), 7.59 (d, *J* = 7.4 Hz, 1H), 7.32 (td, *J* = 7.8, 1.2 Hz, 1H), 7.12 (td, *J* = 7.7, 0.7 Hz, 1H), 6.87 (d, *J* = 7.8 Hz, 1H), 4.64 (d, *J* = 13.7 Hz, 1H), 4.49-4.39 (m, 2H), 4.38-4.26 (m, 3H), 1.34 (dt, *J* = 14.5, 7.1 Hz, 6H);

**<sup>13</sup>C NMR** (101 MHz, CDCl<sub>3</sub>) δ: 174.85, 167.39, 165.34, 141.68, 131.36, 125.27, 124.14, 123.76, 122.52 (q, *J* = 279.6 Hz), 110.80, 94.38, 81.52, 67.88 (q, *J* = 31.4 Hz), 63.34, 63.15, 14.10, 14.06;

**<sup>19</sup>F NMR** (376 MHz, CDCl<sub>3</sub>) δ: -69.12.

**HRMS** (ESI): *m/z* calcd. for C<sub>17</sub>H<sub>18</sub>N<sub>2</sub>O<sub>6</sub>F<sub>3</sub> [M+H]<sup>+</sup>: 403.1111; found: 403.1105.

**HPLC analysis:** The enantiomeric excess was determined by HPLC with Chiralpak IB column (hexane/*i*-PrOH = 95/5, 1 mL·min<sup>-1</sup>, λ = 220 nm): *t*<sub>major</sub> = 9.1 min, *t*<sub>minor</sub> = 14.8 min.

(4*R*,5*S*)-triethyl 4,5-bis(trifluoromethyl)oxazolidine-2,2,5-tricarboxylate (**3aa**): petroleum ether/ ethyl acetate = 8:1, R<sub>f</sub>=0.6.

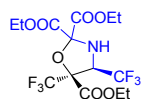

Colorless oil, 86% yield, >20:1 *dr*, 80% *ee*, [*α*]<sub>D</sub><sup>20</sup> = +16.32 (c = 0.28, MeOH).

**<sup>1</sup>H NMR** (400 MHz, CDCl<sub>3</sub>) δ: 4.51 – 4.19 (m, 8H), 1.37 – 1.29 (m, 9H);

**<sup>13</sup>C NMR** (101 MHz, CDCl<sub>3</sub>) δ: 165.94, 165.41, 163.07, 122.26 (q, *J* = 280.1 Hz), 122.03 (q, *J* = 284.8 Hz), 95.86, 84.00 (q, *J* = 31.1 Hz), 64.43 (q, *J* = 33.2 Hz), 63.77, 63.46, 63.41, 14.03, 13.93, 13.71;

**<sup>19</sup>F NMR** (376 MHz, CDCl<sub>3</sub>) δ: -70.09 (dq, *J* = 7.8, 3.9 Hz), -73.87 (q, *J* = 3.9 Hz).

**HRMS** (ESI): *m/z* calcd. for C<sub>14</sub>H<sub>18</sub>NO<sub>7</sub>F<sub>6</sub> [M+H]<sup>+</sup>: 426.0982; found: 426.0984.

**HPLC analysis:** The enantiomeric excess was determined by HPLC with Chiralpak IA column (hexane/*i*-PrOH = 98/2, 1 mL·min<sup>-1</sup>, λ = 220 nm): *t*<sub>major</sub> = 7.2 min, *t*<sub>minor</sub> = 22.8 min.

#### d. General Procedure to Prepare Racemic Products 3u-3z

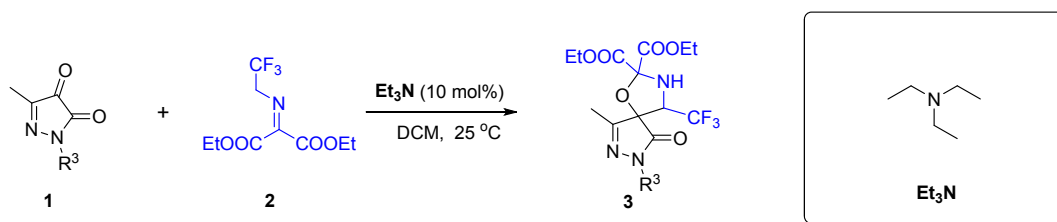

To a solution of diethyl 2-((2,2,2-trifluoroethyl)imino)malonate **2** (0.15 mmol, 1.5 equiv.), and catalyst  $\text{Et}_3\text{N}$  (0.01 mmol, 10 mol%) in DCM (1 mL) was added pyrazolone **1** (0.10 mmol, 1.0 equiv.). The mixture was stirred at room temperature until the reaction was completed (monitored by TLC analysis). The crude product was purified directly by flash column chromatography on silica gel (petroleum ether/ ethyl acetate = 20:1~10:1) to give the desired racemic products **3u-3z**.

#### e. General Procedure to Prepare Chiral Products 3u-3z

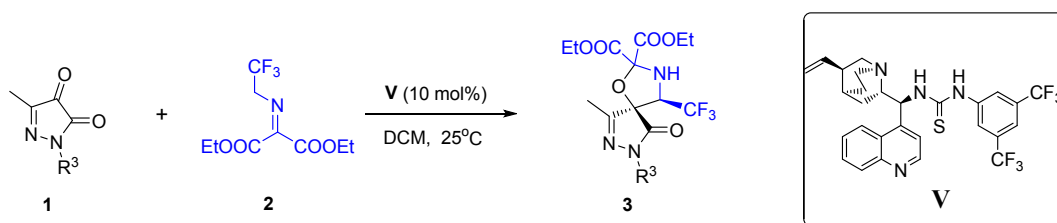

To a solution of diethyl 2-((2,2,2-trifluoroethyl)imino)malonate **2** (0.15 mmol, 1.5 equiv.) and catalyst **V** (0.01 mmol, 10 mol%) in DCE (1 mL) was added pyrazolone **1** (0.10 mmol, 1.0 equiv.). The mixture was stirred at 25 °C until the reaction was completed (monitored by TLC analysis). The crude product was purified directly by flash column chromatography on silica gel (petroleum ether/ ethyl acetate = 20:1~10:1) to give the desired chiral products **3u-3z**.

#### f. Analytical Data for Products 3u-3z

(4*R*,5*R*)-diethyl-6-methyl-9-oxo-8-phenyl-4-(trifluoromethyl)-1-oxa-3,7,8-triazaspiro[4.4]non-6-ene-2,2-dicarboxylate (**3u**): petroleum ether/ ethyl acetate = 10:1,  $R_f$ =0.5.

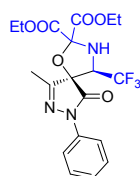

Colorless oil, 98% yield, >20:1 *dr*, 90% *ee*,  $[\alpha]_D^{20} = +28.31$  ( $c = 0.38$ , MeOH).

**$^1\text{H}$  NMR** (400 MHz,  $\text{CDCl}_3$ )  $\delta$ : 7.77 (d,  $J = 7.7$  Hz, 2H), 7.39 (t,  $J = 8.0$  Hz, 2H), 7.20 (t,  $J = 7.4$  Hz, 1H), 4.68 (d,  $J = 13.6$  Hz, 1H), 4.51 – 4.43 (m, 1H), 4.42 – 4.33 (m, 2H), 4.33 – 4.21 (m, 2H), 2.32 (s, 3H), 1.34 (td,  $J = 7.1$ , 4.1 Hz, 6H);

**$^{13}\text{C}$  NMR** (126 MHz,  $\text{CDCl}_3$ )  $\delta$ : 168.22, 166.64, 164.73, 155.72, 137.29, 129.06, 125.83, 122.05 (q,  $J = 279.2$  Hz), 118.88, 95.05, 82.32, 65.05 (q,  $J = 32.6$  Hz), 63.68, 63.32, 14.04, 13.05;

**$^{19}\text{F}$  NMR** (376 MHz,  $\text{CDCl}_3$ )  $\delta$ : -68.94.

**HRMS** (ESI):  $m/z$  calcd. for  $\text{C}_{19}\text{H}_{21}\text{N}_3\text{O}_6\text{F}_3$   $[\text{M}+\text{H}]^+$ : 444.1377; found: 444.1375.

**HPLC analysis**: The enantiomeric excess was determined by HPLC with Chiralpak AD-H column (hexane/*i*-

PrOH = 95/5, 1 mL·min<sup>-1</sup>, λ = 254 nm):  $t_{major}$  = 7.9 min,  $t_{minor}$  = 7.3 min.

(4R,5R)-diethyl-8-(2-chlorophenyl)-6-methyl-9-oxo-4-(trifluoromethyl)-1-oxa-3,7,8-triazaspiro[4.4]non-6-ene-2,2-dicarboxylate (**3v**): petroleum ether/ ethyl acetate = 10:1, Rf=0.5.

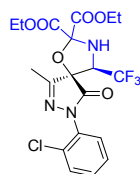

Colorless oil, 96% yield, >20:1 *dr*, 85% *ee*,  $[α]_D^{20}$  = +22.33 (c = 0.30, MeOH).

**<sup>1</sup>H NMR** (400 MHz, CDCl<sub>3</sub>) δ: 7.54 – 7.45 (m, 1H), 7.39 – 7.27 (m, 3H), 4.63 (d, *J* = 13.6 Hz, 1H), 4.49 – 4.41 (m, 1H), 4.41 – 4.33 (m, 2H), 4.32 – 4.21 (m, 2H), 2.30 (s, 3H), 1.34 (t, *J* = 7.1 Hz, 6H);

**<sup>13</sup>C NMR** (126 MHz, CDCl<sub>3</sub>) δ: 168.91, 166.62, 164.57, 155.65, 133.83, 131.67, 130.76, 130.11, 128.13, 127.56, 122.05 (q, *J* = 279.4 Hz), 95.07, 81.23, 64.91 (q, *J* = 32.7 Hz), 63.67, 63.34, 14.03, 13.08;

**<sup>19</sup>F NMR** (376 MHz, CDCl<sub>3</sub>) δ: -68.72.

**HRMS** (ESI): *m/z* calcd. for C<sub>19</sub>H<sub>20</sub>N<sub>3</sub>O<sub>6</sub>F<sub>3</sub>Cl [M+H]<sup>+</sup>: 478.0987; found: 478.0989.

**HPLC analysis:** The enantiomeric excess was determined by HPLC with Chiralpak IC column (hexane/*i*-PrOH = 95/5, 0.8 mL·min<sup>-1</sup>, λ = 254 nm):  $t_{major}$  = 9.5 min,  $t_{minor}$  = 8.5 min.

(4R,5R)-diethyl-8-(3-chlorophenyl)-6-methyl-9-oxo-4-(trifluoromethyl)-1-oxa-3,7,8-triazaspiro[4.4]non-6-ene-2,2-dicarboxylate (**3w**): petroleum ether/ ethyl acetate = 10:1, Rf=0.4.

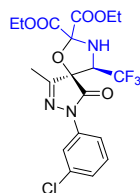

Colorless oil, 96% yield, >20:1 *dr*, 80% *ee*,  $[α]_D^{20}$  = +6.40 (c = 0.25, MeOH).

**<sup>1</sup>H NMR** (400 MHz, CDCl<sub>3</sub>) δ: 7.85 (t, *J* = 2.0 Hz, 1H), 7.79 – 7.66 (m, 1H), 7.30 (t, *J* = 8.2 Hz, 1H), 7.17 (dd, *J* = 8.4, 1.5 Hz, 1H), 4.66 (d, *J* = 13.6 Hz, 1H), 4.53 – 4.43 (m, 1H), 4.42 – 4.33 (m, 2H), 4.31 – 4.21 (m, 2H), 2.32 (s, 3H), 1.38 – 1.32 (m, 6H);

**<sup>13</sup>C NMR** (126 MHz, CDCl<sub>3</sub>) δ: 168.16, 166.42, 164.55, 156.10, 138.20, 134.76, 130.02, 125.61, 121.87 (q, *J* = 279.4 Hz), 118.56, 116.39, 94.98, 82.22, 65.01 (q, *J* = 32.6 Hz), 63.63, 63.25, 13.92, 12.95;

**<sup>19</sup>F NMR** (376 MHz, CDCl<sub>3</sub>) δ: -68.91

**HRMS** (ESI): *m/z* calcd. for C<sub>19</sub>H<sub>20</sub>N<sub>3</sub>O<sub>6</sub>F<sub>3</sub>Cl [M+H]<sup>+</sup>: 478.0987; found: 478.0988.

**HPLC analysis:** The enantiomeric excess was determined by HPLC with Chiralpak IC column (hexane/*i*-PrOH = 95/5, 0.8 mL·min<sup>-1</sup>, λ = 254 nm):  $t_{major}$  = 6.1 min,  $t_{minor}$  = 7.8 min.

(4R,5R)-diethyl-8-(4-bromophenyl)-6-methyl-9-oxo-4-(trifluoromethyl)-1-oxa-3,7,8-triazaspiro[4.4]non-6-ene-2,2-dicarboxylate (**3x**): petroleum ether/ ethyl acetate = 10:1, Rf=0.4.

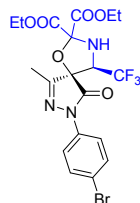

Colorless oil, 98% yield, >20:1 *dr*, 77% *ee*,  $[α]_D^{20}$  = +14.33 (c = 0.31, MeOH).

**<sup>1</sup>H NMR** (400 MHz, CDCl<sub>3</sub>) δ: 7.70 (d, *J* = 9.0 Hz, 2H), 7.49 (d, *J* = 9.0 Hz, 2H), 4.65 (d, *J* = 13.6 Hz, 1H), 4.52

– 4.42 (m, 1H), 4.41 – 4.32 (m, 2H), 4.31 – 4.19 (m, 2H), 2.32 (s, 3H), 1.34 (td,  $J = 7.1, 3.7$  Hz, 6H);  
 $^{13}\text{C}$  NMR (126 MHz,  $\text{CDCl}_3$ )  $\delta$ : 168.18, 166.57, 164.68, 156.18, 136.39, 132.10, 122.00 (q,  $J = 279.4$  Hz), 120.19, 118.74, 95.10, 82.32, 65.13 (q,  $J = 32.5$  Hz), 63.75, 63.38, 14.06, 13.09;  
 $^{19}\text{F}$  NMR (376 MHz,  $\text{CDCl}_3$ )  $\delta$ : 68.93.

**HRMS** (ESI):  $m/z$  calcd. for  $\text{C}_{19}\text{H}_{20}\text{N}_3\text{O}_6\text{F}_3\text{Br}$   $[\text{M}+\text{H}]^+$ : 522.0482; found: 522.0483.

**HPLC analysis:** The enantiomeric excess was determined by HPLC with Chiralpak IC column (hexane/*i*-PrOH = 95/5,  $1\text{ mL}\cdot\text{min}^{-1}$ ,  $\lambda = 254\text{ nm}$ ):  $t_{\text{major}} = 5.0\text{ min}$ ,  $t_{\text{minor}} = 6.5\text{ min}$ .

(4*R*,5*R*)-diethyl-8-(tert-butyl)-6-methyl-9-oxo-4-(trifluoromethyl)-1-oxa-3,7,8-triazaspiro[4.4]non-6-ene-2,2-dicarboxylate (**3y**): petroleum ether/ ethyl acetate = 10:1,  $R_f=0.3$ .

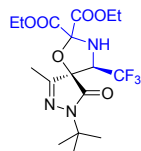

Colorless oil, 98% yield, >20:1 *dr*, 82% *ee*,  $[\alpha]_D^{20} = +39.67$  ( $c = 0.30$ , MeOH).

$^1\text{H}$  NMR (500 MHz,  $\text{CDCl}_3$ )  $\delta$ : 4.54 (d,  $J = 13.6$  Hz, 1H), 4.50 – 4.41 (m, 1H), 4.40 – 4.31 (m, 2H), 4.29 – 4.21 (m, 1H), 4.08 (dq,  $J = 13.5, 6.7$  Hz, 1H), 2.14 (s, 3H), 1.42 (s, 9H), 1.35 – 1.29 (m, 6H);

$^{13}\text{C}$  NMR (126 MHz,  $\text{CDCl}_3$ )  $\delta$ : 169.93, 166.82, 164.87, 152.95, 122.15 (q,  $J = 279.3$  Hz), 94.80, 82.50, 64.57 (q,  $J = 32.2$  Hz), 63.52, 63.15, 58.01, 27.90, 14.03, 12.87;

$^{19}\text{F}$  NMR (471 MHz,  $\text{CDCl}_3$ )  $\delta$ : -69.19.

**HRMS** (ESI):  $m/z$  calcd. for  $\text{C}_{17}\text{H}_{25}\text{N}_3\text{O}_6\text{F}_3$   $[\text{M}+\text{H}]^+$ : 424.1690; found: 424.1688.

**HPLC analysis:** The enantiomeric excess was determined by HPLC with Chiralpak IC column (hexane/*i*-PrOH = 98/2,  $1\text{ mL}\cdot\text{min}^{-1}$ ,  $\lambda = 254\text{ nm}$ ):  $t_{\text{major}} = 8.4\text{ min}$ ,  $t_{\text{minor}} = 7.7\text{ min}$ .

(4*R*,5*R*)-diethyl 6,8-dimethyl-9-oxo-4-(trifluoromethyl)-1-oxa-3,7,8-triazaspiro[4.4]non-6-ene-2,2-dicarboxylate (**3z**): petroleum ether/ ethyl acetate = 10:1,  $R_f=0.3$ .

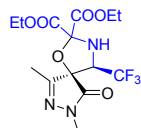

Colorless oil, 98% yield, >20:1 *dr*, 83% *ee*,  $[\alpha]_D^{20} = +46.67$  ( $c = 0.24$ , MeOH).

$^1\text{H}$  NMR (400 MHz,  $\text{CDCl}_3$ )  $\delta$ : 4.56 (d,  $J = 13.5$  Hz, 1H), 4.50 – 4.41 (m, 1H), 4.39 – 4.29 (m, 2H), 4.28 – 4.21 (m, 1H), 4.14 (td,  $J = 13.4, 6.6$  Hz, 1H), 3.22 (s, 3H), 2.18 (s, 3H), 1.32 (dt,  $J = 9.6, 7.1$  Hz, 6H);

$^{13}\text{C}$  NMR (126 MHz,  $\text{CDCl}_3$ )  $\delta$ : 169.91, 166.69, 164.71, 154.72, 122.02 (q,  $J = 279.3$  Hz), 94.87, 81.17, 64.59 (q,  $J = 32.5$  Hz), 63.59, 63.24, 31.61, 14.02, 12.86.

$^{19}\text{F}$  NMR (376 MHz,  $\text{CDCl}_3$ )  $\delta$ : -69.24.

**HRMS** (ESI):  $m/z$  calcd. for  $\text{C}_{14}\text{H}_{19}\text{N}_3\text{O}_6\text{F}_3$   $[\text{M}+\text{H}]^+$ : 382.1220; found: 382.1202.

**HPLC analysis:** The enantiomeric excess was determined by HPLC with Chiralpak IC column (hexane/*i*-PrOH = 95/5,  $0.8\text{ mL}\cdot\text{min}^{-1}$ ,  $\lambda = 254\text{ nm}$ ):  $t_{\text{major}} = 10.3\text{ min}$ ,  $t_{\text{minor}} = 17.1\text{ min}$ .

## g. Transformation of 3a to 4a

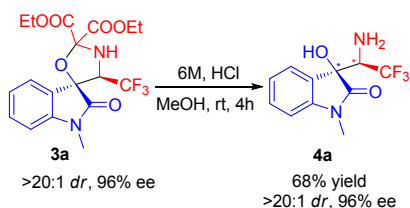

To a solution of spirooxindole-oxazoline **3a** (0.30 mmol) in MeOH (5 mL) was added 6M HCl (3 mL). The mixture was stirred at room temperature until the reaction was completed (monitored by TLC analysis). Remove the solvent under vacuum. Then 5 mL water was added and extract three times with 10 mL of DCM. The water phase uses ammonia to adjust pH to alkaline. Then extract with DCM (10 mL x 3). The organic phase was dried with Na<sub>2</sub>SO<sub>4</sub> and the solution was removed to obtain the desired product **4a** as a colourless oil.

(S)-3-((R)-1-amino-2,2,2-trifluoroethyl)-3-hydroxy-1-methylindolin-2-one (**4a**): petroleum ether/ ethyl acetate = 3:1, R<sub>f</sub>=0.2.

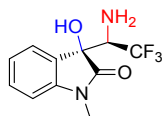

colourless oil, 68% yield, >20:1 dr, 96% ee,  $[\alpha]_D^{20} = +42.17$  (c=0.29, MeOH).

**<sup>1</sup>H NMR** (400 MHz, CDCl<sub>3</sub>) δ: <sup>1</sup>H NMR (400 MHz, CDCl<sub>3</sub>) δ 7.40 – 7.32 (m, 2H), 7.11 (t, *J* = 7.6 Hz, 1H), 6.85 (d, *J* = 8.2 Hz, 1H), 4.85 (s, 1H), 3.78 – 3.61 (m, 1H), 3.18 (s, 3H), 2.11 (s, 2H).

**<sup>13</sup>C NMR** (101 MHz, CDCl<sub>3</sub>) δ: 175.77, 144.24, 130.61, 126.44, 124.84 (q, *J* = 284.5 Hz), 124.45, 123.22, 108.68, 72.61, 59.98 (q, *J* = 28.5 Hz), 26.15.

**<sup>19</sup>F NMR** (376 MHz, CDCl<sub>3</sub>) δ: -71.94.

**HRMS** (ESI): *m/z* [M+H]<sup>+</sup> calcd. for [C<sub>11</sub>H<sub>12</sub>N<sub>2</sub>F<sub>3</sub>O<sub>2</sub>]<sup>+</sup>: 261.0846, found: 261.0853;

**HPLC analysis:** The enantiomeric excess was determined by HPLC with a Chiralpak AD-H column (hexane/*i*-PrOH = 95/5, 1.0 mL·min<sup>-1</sup>, λ = 245 nm): *t*<sub>major</sub> = 57.5 min, *t*<sub>minor</sub> = 39.0 min.

## h. Transformation of 3y to 4y

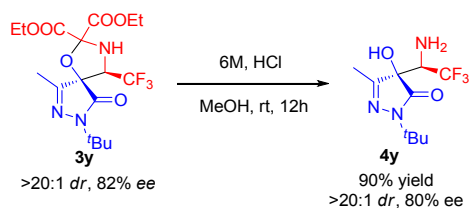

To a solution of spiropyrazolones-oxazolidine **3y** (0.30 mmol) in MeOH (5 mL) was added 6M HCl (3 mL). The mixture was stirred at room temperature until the reaction was completed (monitored by TLC analysis). Remove the solvent under vacuum. Then 5 mL water was added and extract three times with 10 mL of DCM. The water phase uses ammonia to adjust pH to alkaline. Then extract with DCM (10 mL x 3). The organic phase was dried with Na<sub>2</sub>SO<sub>4</sub> and the solution was removed to obtain the desired product **4y** as a colourless oil.

(R)-4-((R)-1-amino-2,2,2-trifluoroethyl)-1-(tert-butyl)-4-hydroxy-3-methyl-1H-pyrazol-5(4H)-one (**4y**): petroleum ether/ ethyl acetate = 3:1, R<sub>f</sub>=0.4.

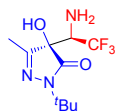

colourless oil, 90% yield, >20:1 *dr*, 80% *ee*,  $[\alpha]_D^{20} = +21.16$  ( $c=0.23$ , MeOH).

**$^1\text{H}$  NMR** (400 MHz,  $\text{CDCl}_3$ )  $\delta$ :  $^1\text{H}$  NMR (400 MHz,  $\text{CDCl}_3$ )  $\delta$  3.41 (q,  $J = 7.4$  Hz, 1H), 2.03 (s, 3H), 1.46 (s, 9H).

**$^{13}\text{C}$  NMR** (126 MHz,  $\text{CDCl}_3$ )  $\delta$ : 172.58, 156.26, 124.52 (q,  $J = 282.4$  Hz), 74.25, 58.31 (q,  $J = 29.6$  Hz), 57.83, 27.98, 12.99.

**$^{19}\text{F}$  NMR** (376 MHz,  $\text{CDCl}_3$ )  $\delta$ : -73.28.

**HRMS** (ESI):  $m/z$   $[\text{M}+\text{H}]^+$  calcd. for  $[\text{C}_{10}\text{H}_{17}\text{N}_3\text{F}_3\text{O}_2]^+$ : 268.1267, found: 268.1262;

**HPLC analysis**: The enantiomeric excess was determined by HPLC with a Chiralpak IA column (hexane/*i*-PrOH = 90/10,  $1.0\text{ mL}\cdot\text{min}^{-1}$ ,  $\lambda = 254\text{ nm}$ ):  $t_{\text{major}} = 6.4\text{ min}$ ,  $t_{\text{minor}} = 7.3\text{ min}$ .

## i. Application of oxa-1,3-DC in desymmetrization

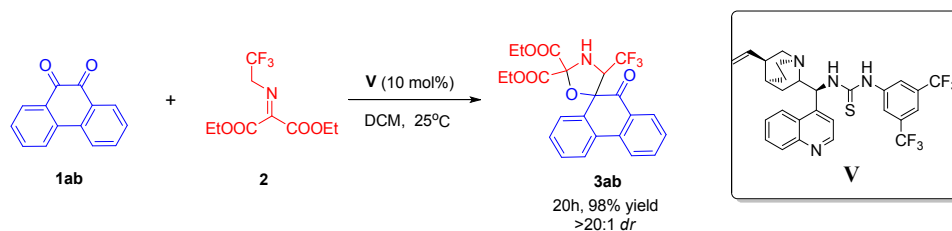

To a solution of diethyl 2-((2,2,2-trifluoroethyl)imino)malonate **2** (0.15 mmol, 1.5 equiv.) and catalyst **V** (0.01 mmol, 10 mol%) in DCE (1 mL) was added phenanthrenequinone **1ab** (0.10 mmol, 1.0 equiv.). The mixture was stirred at  $25\text{ }^\circ\text{C}$  until the reaction was completed (monitored by TLC analysis). The crude product was purified directly by flash column chromatography on silica gel (petroleum ether/ ethyl acetate = 20:1~10:1) to give the desired chiral products **3ab**.

Diethyl 10'-oxo-4-(trifluoromethyl)-10'H-spiro[oxazolidine-5,9'-phenanthrene]-2,2-dicarboxylate (**3ab**):

petroleum ether/ ethyl acetate = 20:1,  $R_f=0.4$ .

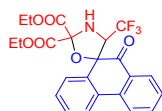

colourless oil, 98% yield, >20:1 *dr*.

**$^1\text{H}$  NMR** (400 MHz,  $\text{CDCl}_3$ )  $\delta$ :  $^1\text{H}$  NMR (400 MHz,  $\text{CDCl}_3$ )  $\delta$ : 8.69 (d,  $J = 8.0$  Hz, 2H), 7.94 (d,  $J = 8.6$  Hz, 2H), 7.70 – 7.54 (m, 4H), 4.49 (d,  $J = 8.0$  Hz, 1H), 4.38 (d,  $J = 8.0$  Hz, 1H), 4.25 – 4.15 (m, 2H), 4.14 – 4.05 (m, 2H), 1.09 (t,  $J = 7.1$  Hz, 6H).

**$^{13}\text{C}$  NMR** (126 MHz,  $\text{CDCl}_3$ )  $\delta$ : 167.43, 137.14, 127.69, 127.42, 125.61, 123.55, 120.35, 120.30, 120.03 (q,  $J = 288.1$  Hz), 116.45 (q,  $J = 35.7$  Hz), 62.68, 56.59, 13.84.

**$^{19}\text{F}$  NMR** (376 MHz,  $\text{CDCl}_3$ )  $\delta$ : -85.37.

**HRMS** (ESI):  $m/z$   $[\text{M}+\text{H}]^+$  calcd. for  $[\text{C}_{23}\text{H}_{21}\text{NF}_3\text{O}_6]^+$ : 464.1315, found: 464.1313;

#### 4. Proposed Reaction Mechanism

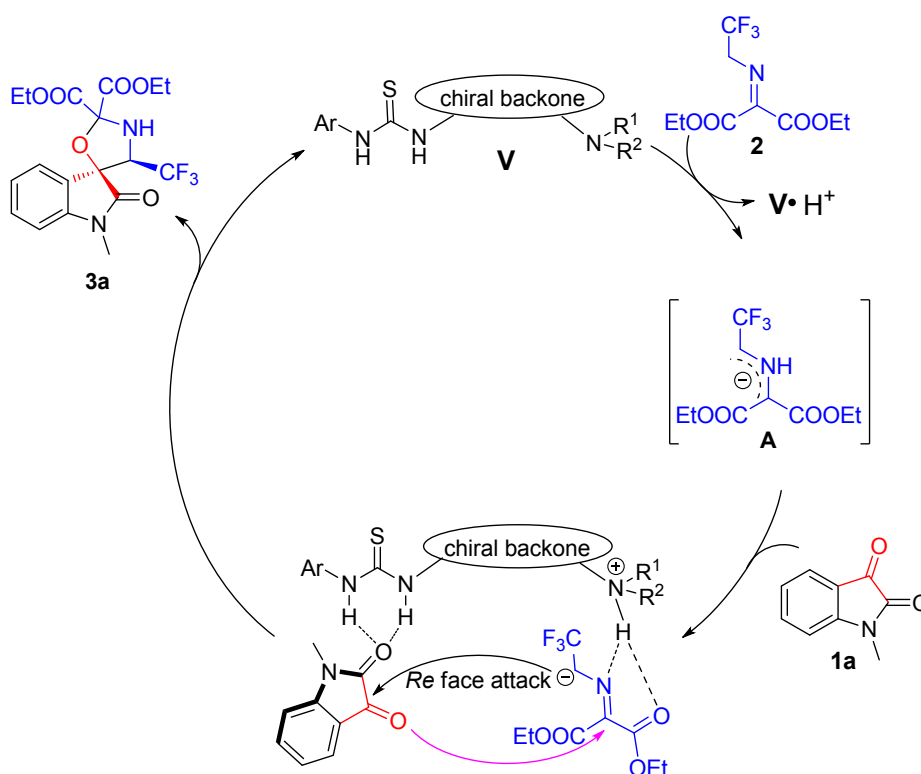

Figure S1. Proposed reaction mechanism

According to the absolute configuration of **3a** and literature reports,<sup>1a,2</sup> we proposed a possible reaction mechanism for the catalytic asymmetric oxa-1,3-dipolar cycloaddition as shown in **Figure S1**. Catalyst **V** initially promoted the formation of an intermediate **A** through the deprotonation of the precursor **2**. Both the intermediate **A** and **1a** are simultaneously activated via hydrogen-bonding interactions. The thiourea moiety of catalyst **V** formed two hydrogen bonds with the carbonyl group of the isatin **1a**. The tertiary amine moiety deprotonated and activated the diethyl 2-(2,2,2-trifluoroethylimino)malonate **2** via double hydrogen bonds. In this oxa-1,3-dipolar cycloaddition step, the trifluoromethyl ortho carbon position of activated diethyl 2-(2,2,2-trifluoroethylimino)malonate **2** attacks the 3-position of isatin **1a** (Re-face). Subsequently, an intramolecular cycloaddition generates the product **3a** (Figure S1).

#### 5. References

- [1] a) Su, J.; Ma, Z.; Li, X.; Lin, L.; Shen, Z.; Yang, P.; Li, Y.; Wang, H.; Yan, W.; Wang, K.; Wang, R. *Adv. Synth. Catal.* **2016**, 358, 3777. b) Ponce, A.; Alonso, I.; Adrio, J.; Carretero, J. C. *Chem. Eur. J.* **2016**, 22, 4952.
- [2] a) Huang, W. J.; Chen, Q.; Lin, N.; Long, X. W.; Pan, W. G.; Xiong, Y. S.; Weng, J.; Lu, G. *Org. Chem. Front.* **2017**, 4, 472. b) N. Lin, X. W. Long, Q. Chen, W. R. Zhu, B. C. Wang, K. B. Chen, C. W. Jiang, J. Weng, G. Lu, *Tetrahedron* **2018**, 74, 3734; c) W. R. Zhu, Q. Chen, N. Lin, K. B. Chen, Z. W. Zhang, G. Fang, J. Weng, G. Lu, *Org. Chem. Front.* **2018**, 5, 1375; d) Zhu, W. R.; Zhang, Z. W.; Huang, W. H.; Lin, N.; Chen, Q.; Chen, K. B.; Wang, B. C.; Weng, J.; Lu, G. *Synthesis* **2019**, 51, 1969.

## 6. Data for X-Ray Crystal Structure of 3a

**Procedure for the recrystallization of 3a:** To a 10 mL vial containing **3a** (35 mg), was added a 1:9 mixture of isopropanol and n-hexane until it formed a clear solution. The mixture was kept aside 3 days at room temperature to obtain crystals by slow evaporation. These crystals were subjected for single crystal XRD to determine the absolute configuration of **3a**.

**Table 1** Crystal data and structure refinement

|                                                              |                                                                                    |
|--------------------------------------------------------------|------------------------------------------------------------------------------------|
| Compound                                                     | 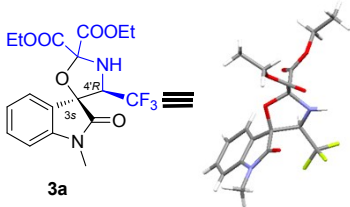 |
| Empirical formula                                            | C <sub>18</sub> H <sub>19</sub> F <sub>3</sub> N <sub>2</sub> O <sub>6</sub>       |
| Formula weight                                               | 416.35                                                                             |
| Temperature/K                                                | 100.0                                                                              |
| Crystal system                                               | orthorhombic                                                                       |
| Space group                                                  | <i>P</i> 2 <sub>1</sub> 2 <sub>1</sub> 2 <sub>1</sub>                              |
| <i>a</i> /Å                                                  | 8.80560(10)                                                                        |
| <i>b</i> /Å                                                  | 8.83160(10)                                                                        |
| <i>c</i> /Å                                                  | 24.7208(3)                                                                         |
| $\alpha$ /°                                                  | 90                                                                                 |
| $\beta$ /°                                                   | 90                                                                                 |
| $\gamma$ /°                                                  | 90                                                                                 |
| Volume/Å <sup>3</sup>                                        | 1922.48(4)                                                                         |
| <i>Z</i>                                                     | 4                                                                                  |
| $\rho_{\text{calc}}$ /cm <sup>3</sup>                        | 1.438                                                                              |
| $\mu$ /mm <sup>-1</sup>                                      | 1.102                                                                              |
| <i>F</i> (000)                                               | 864.0                                                                              |
| Crystal size/mm <sup>3</sup>                                 | 0.3 × 0.2 × 0.1                                                                    |
| Radiation                                                    | CuK $\alpha$ ( $\lambda$ = 1.54178)                                                |
| 2 $\theta$ range for data collection/°                       | 14.202 to 151.914                                                                  |
| Index ranges                                                 | -10 ≤ <i>h</i> ≤ 10,                                                               |
| Reflections collected                                        | 19227                                                                              |
| Independent reflections                                      | 3936 [R <sub>int</sub> = 0.0335,                                                   |
| Data/restraints/parameters                                   | 3936/8/317                                                                         |
| Goodness-of-fit on <i>F</i> <sup>2</sup>                     | 1.082                                                                              |
| Final <i>R</i> indexes [ <i>I</i> ≥ 2 $\sigma$ ( <i>I</i> )] | <i>R</i> <sub>1</sub> = 0.0401, <i>wR</i> <sub>2</sub> = 0.1109                    |
| Final <i>R</i> indexes [all data]                            | <i>R</i> <sub>1</sub> = 0.0404, <i>wR</i> <sub>2</sub> = 0.1114                    |
| Largest diff. peak/hole/e Å <sup>-3</sup>                    | 0.42/-0.43                                                                         |



## 7. Copies of NMR Spectra of Compounds

### <sup>1</sup>H NMR of compound 3a (in CDCl<sub>3</sub>)

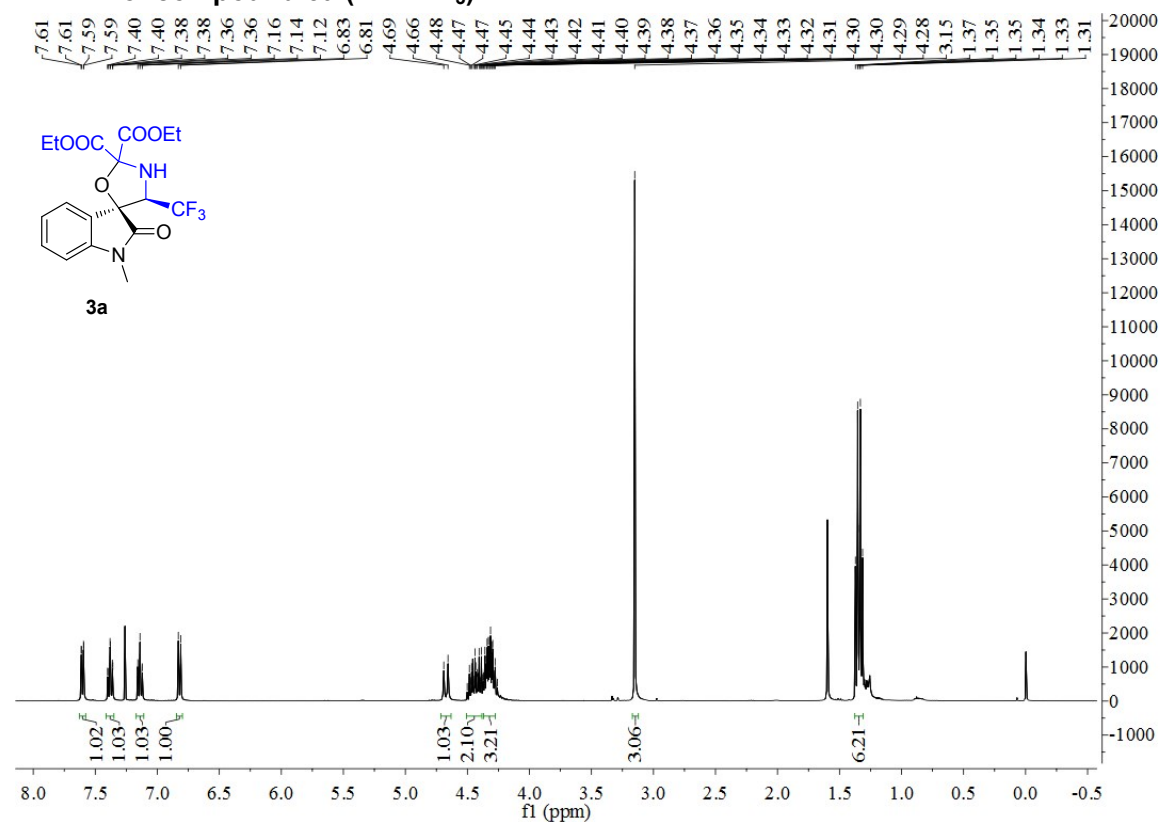

### <sup>13</sup>C NMR of compound 3a (in CDCl<sub>3</sub>)

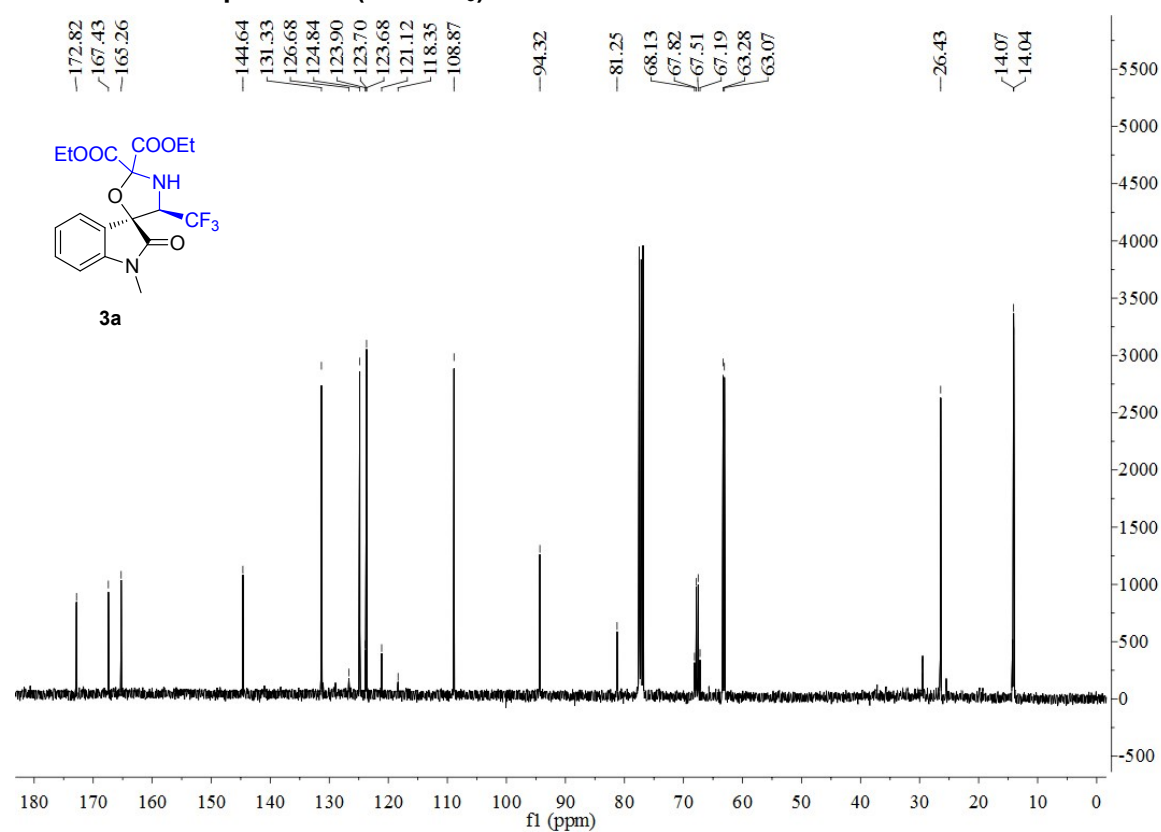

**$^{19}\text{F}$  NMR of compound 3a (in  $\text{CDCl}_3$ )**

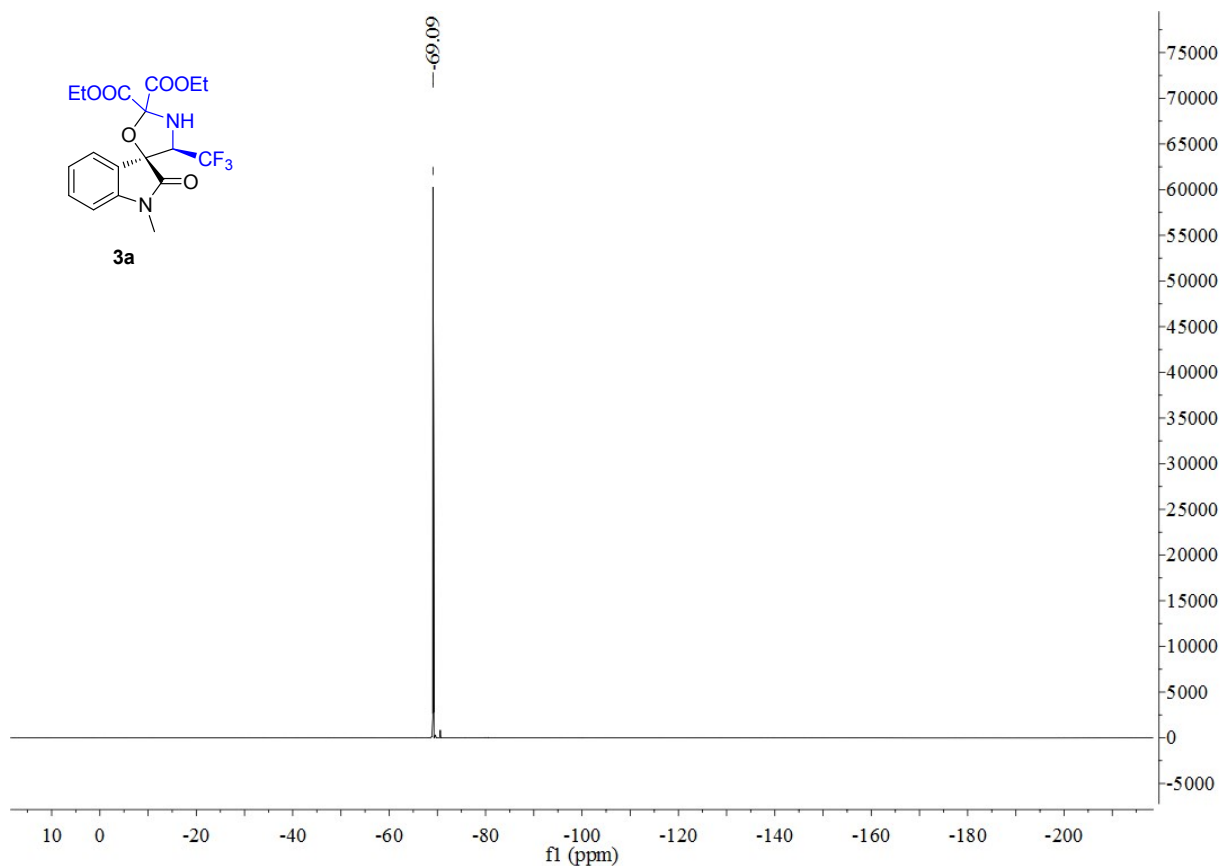

**$^1\text{H}$  NMR of compound 3b (in  $\text{CDCl}_3$ )**

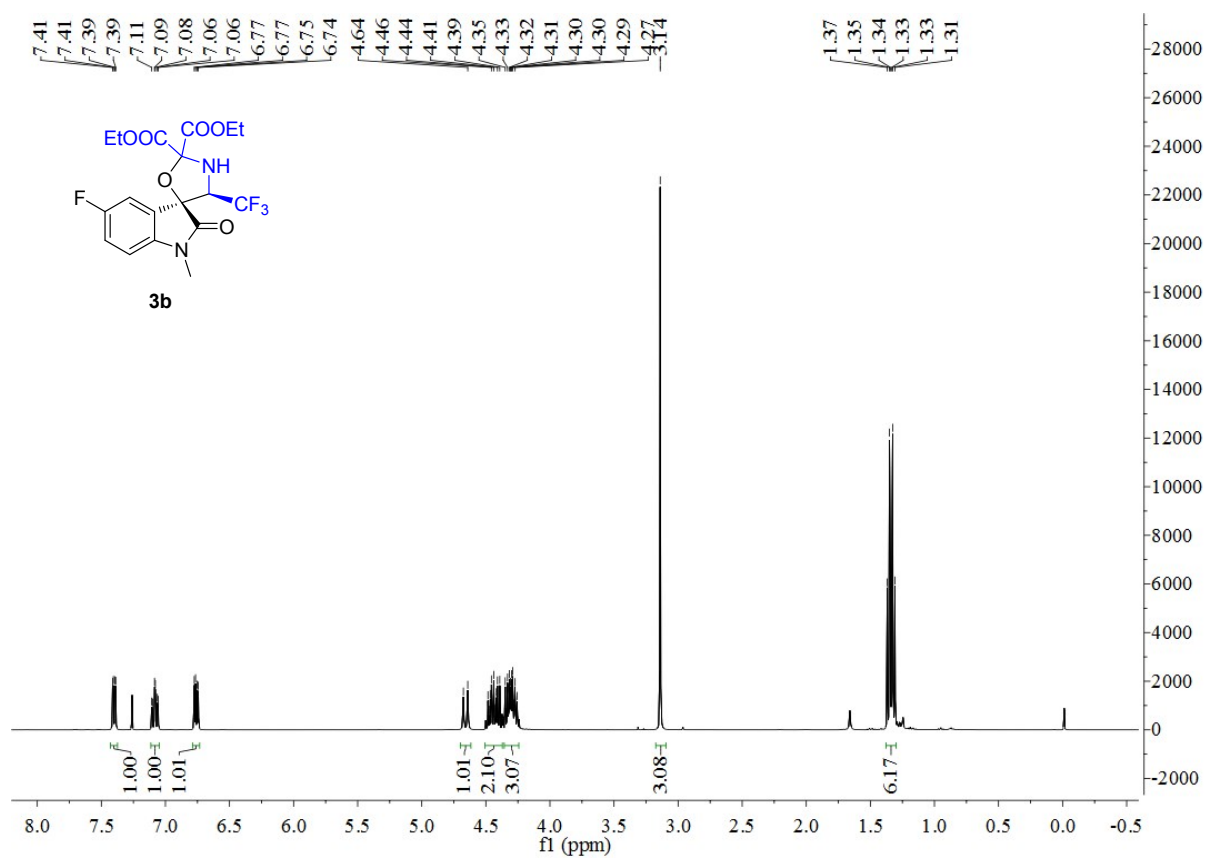

**<sup>13</sup>C NMR of compound 3b (in CDCl<sub>3</sub>)**

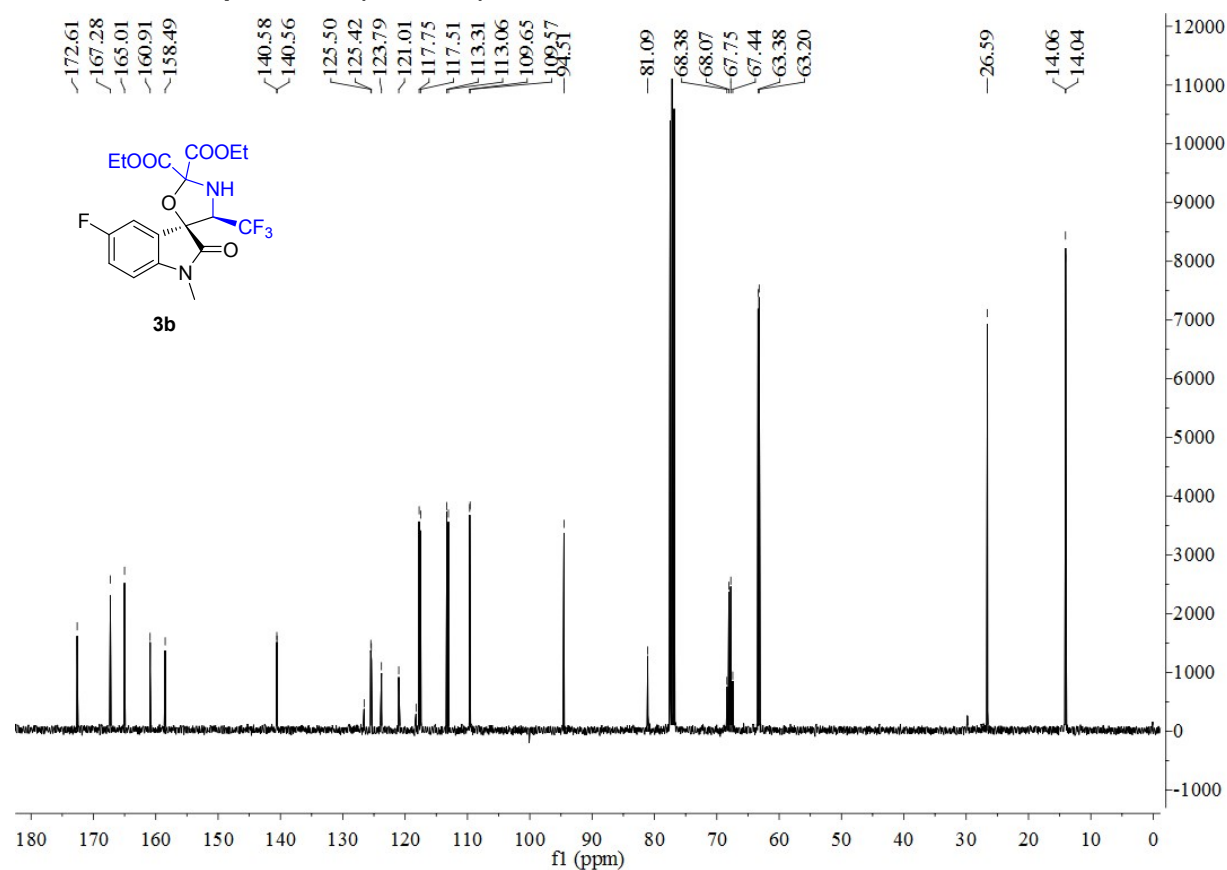

**<sup>19</sup>F NMR of compound 3b (in CDCl<sub>3</sub>)**

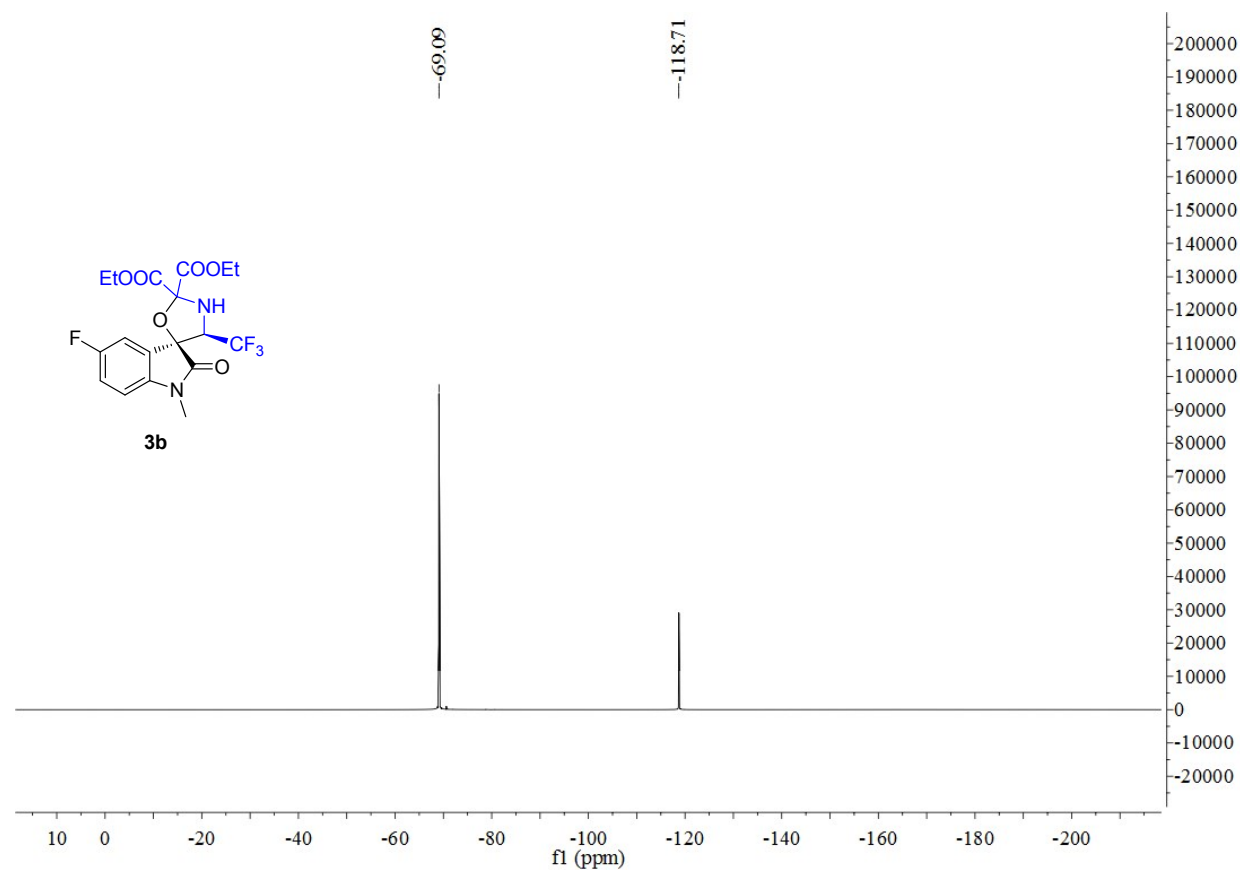

**<sup>1</sup>H NMR of compound 3c (in CDCl<sub>3</sub>)**

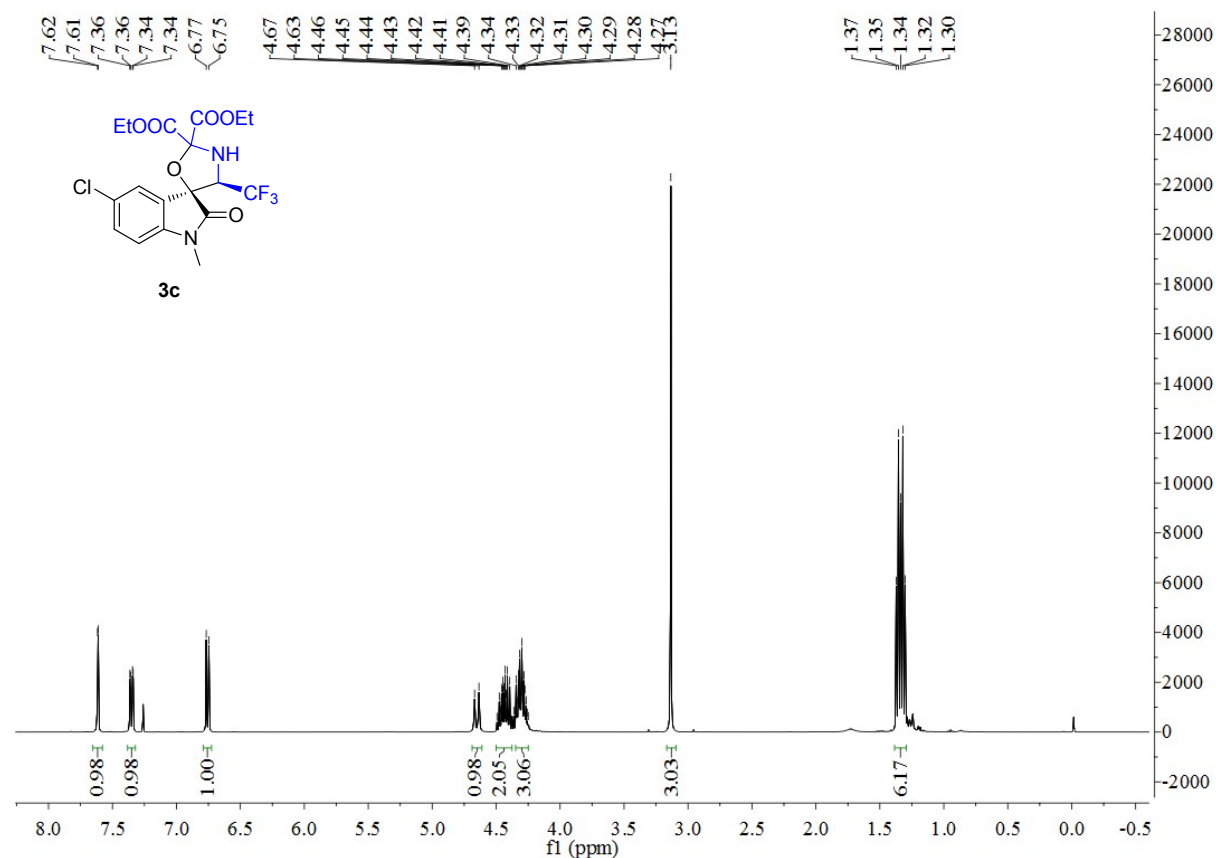

**<sup>13</sup>C NMR of compound 3c (in CDCl<sub>3</sub>)**

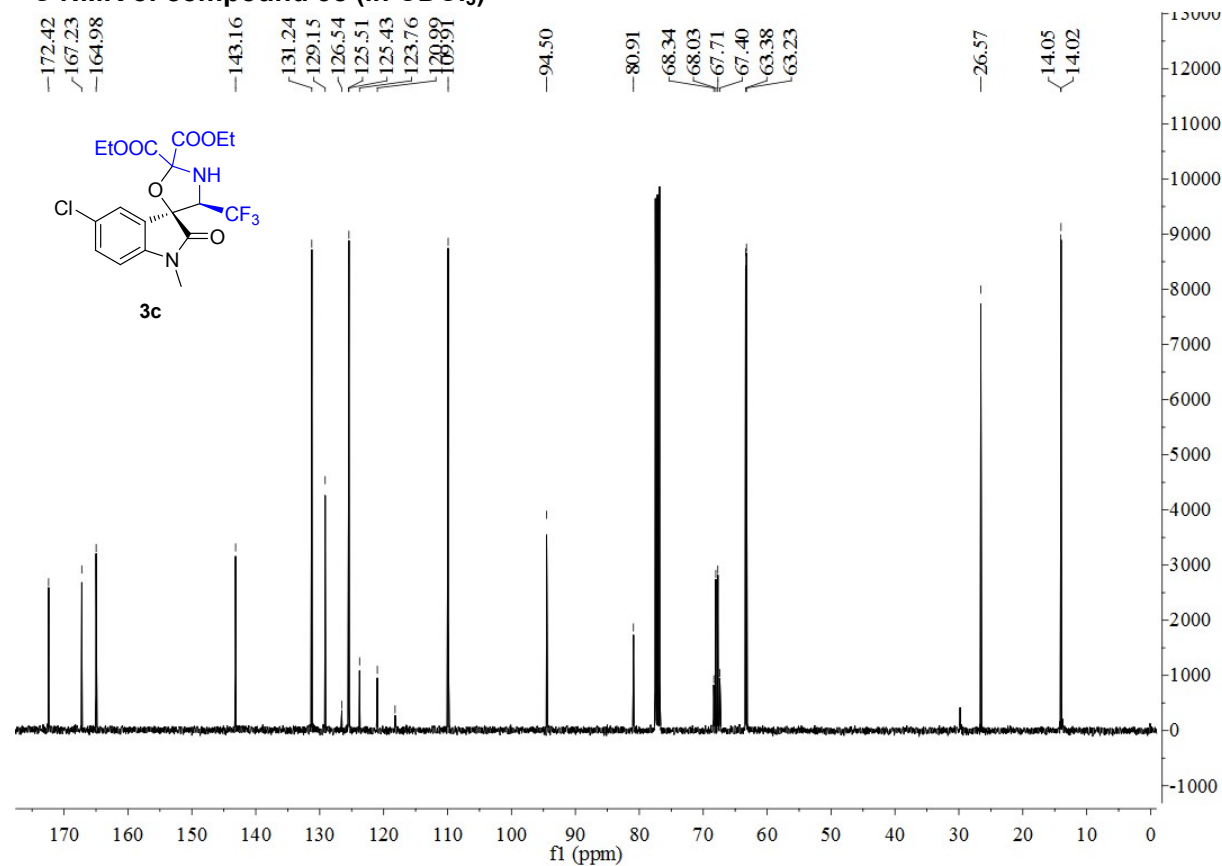

**$^{19}\text{F}$  NMR of compound 3c (in  $\text{CDCl}_3$ )**

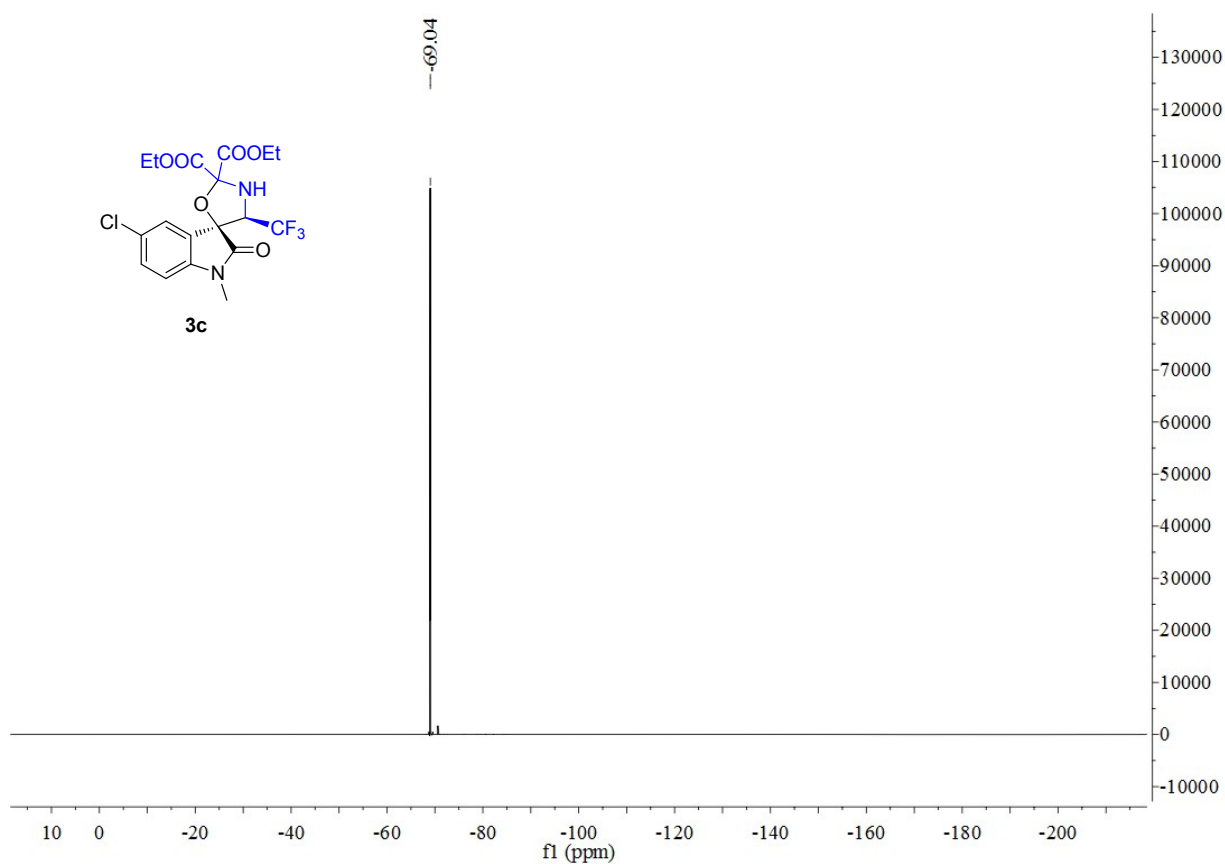

**$^1\text{H}$  NMR of compound 3d (in  $\text{CDCl}_3$ )**

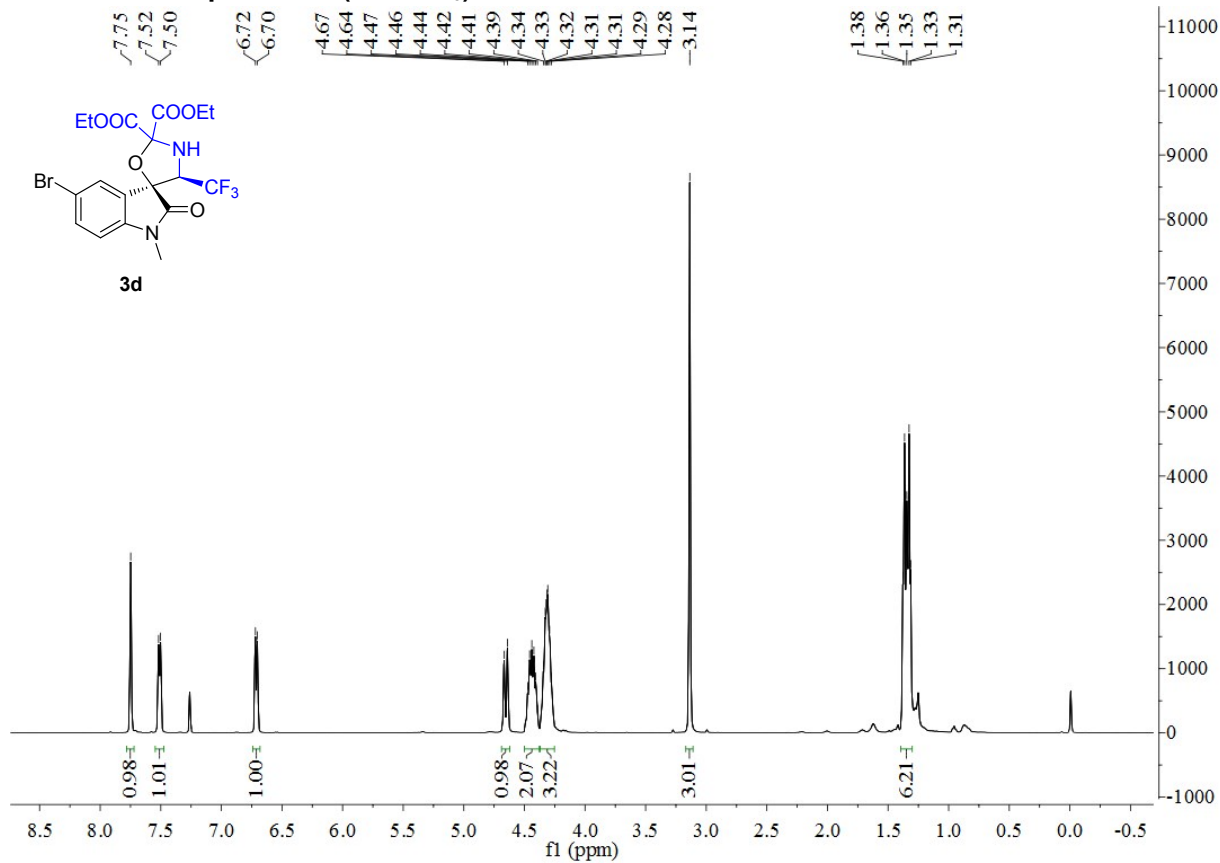

**<sup>13</sup>C NMR of compound 3d (in CDCl<sub>3</sub>)**

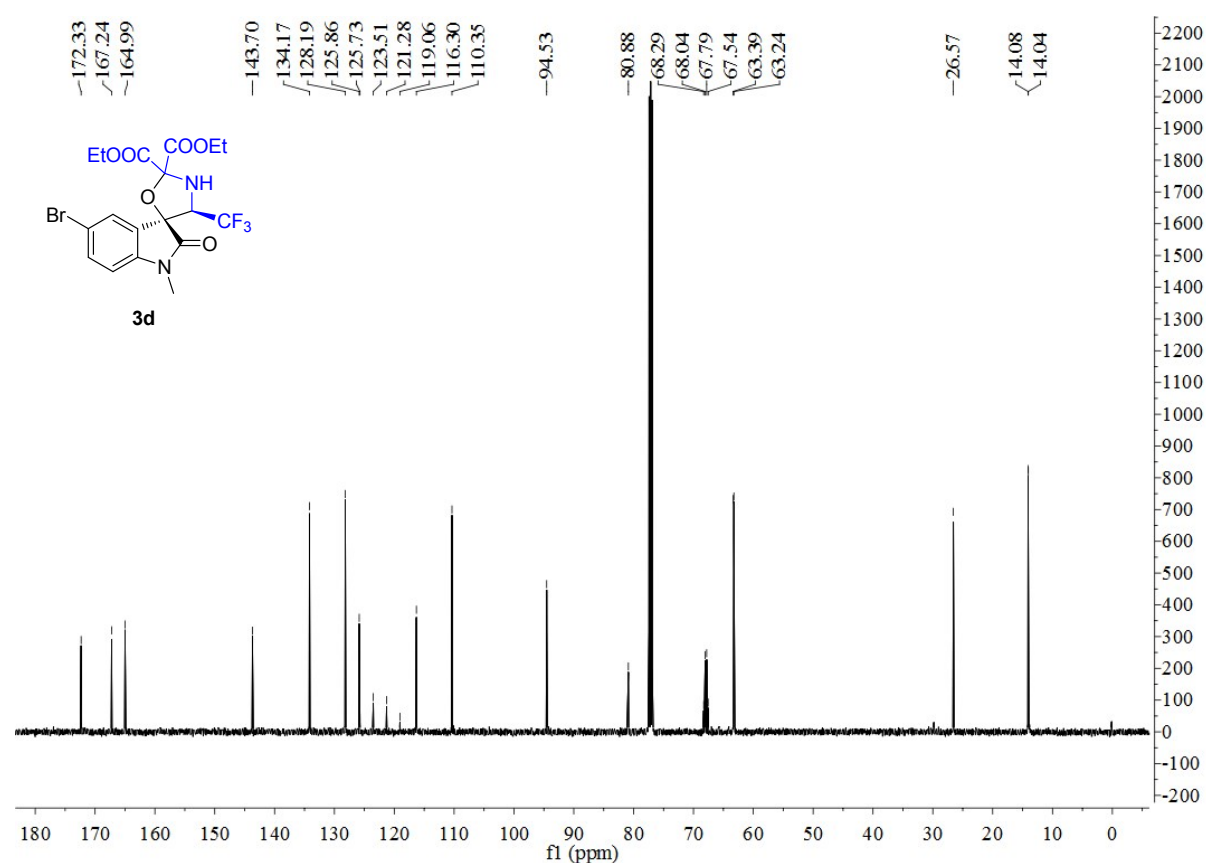

**<sup>19</sup>F NMR of compound 3d (in CDCl<sub>3</sub>)**

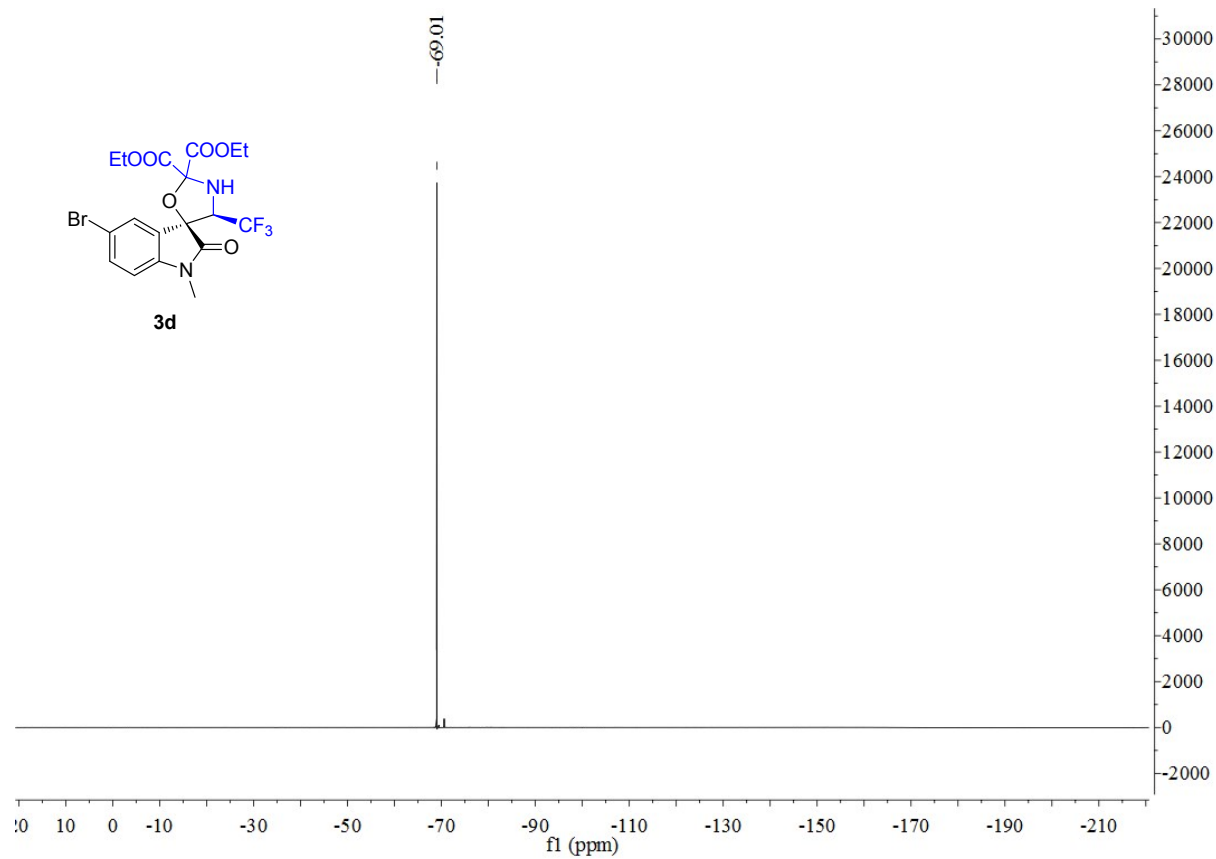

**<sup>1</sup>H NMR of compound 3e (in CDCl<sub>3</sub>)**

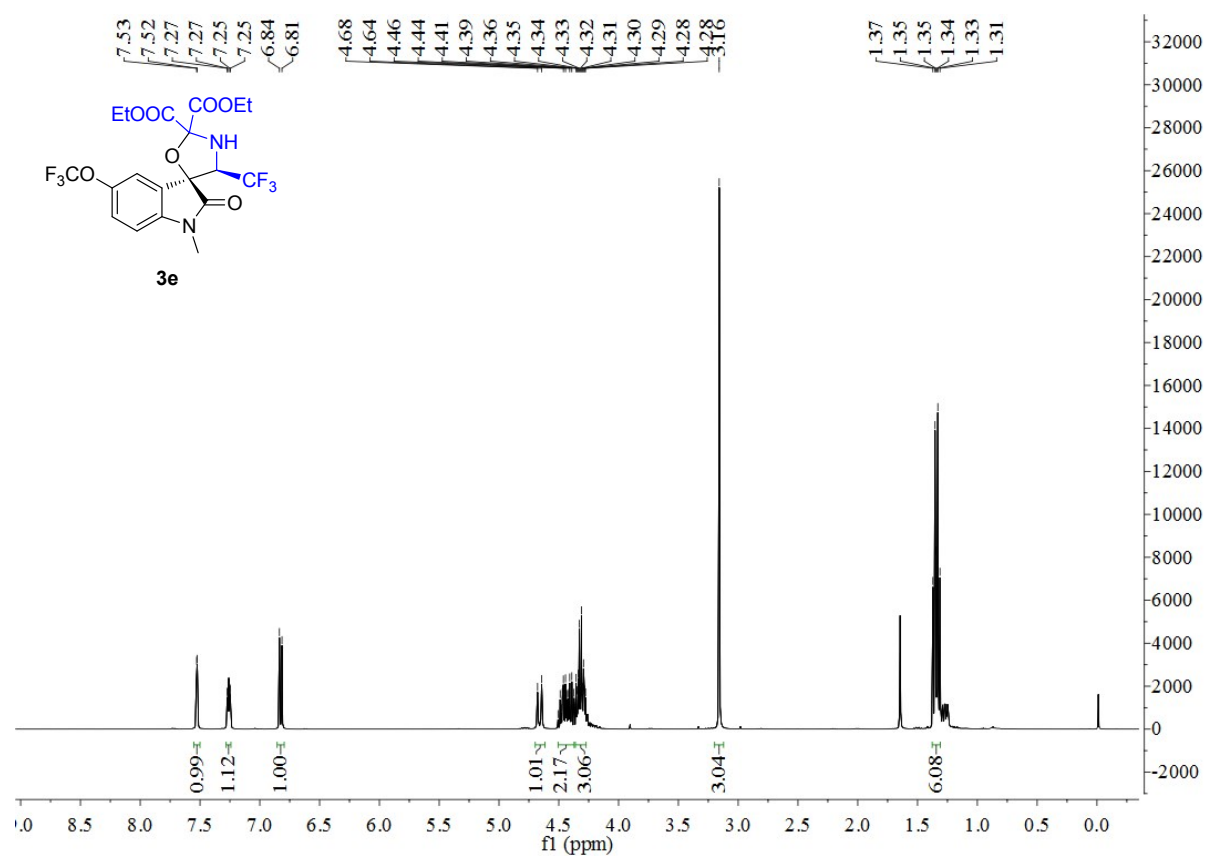

**<sup>13</sup>C NMR of compound 3e (in CDCl<sub>3</sub>)**

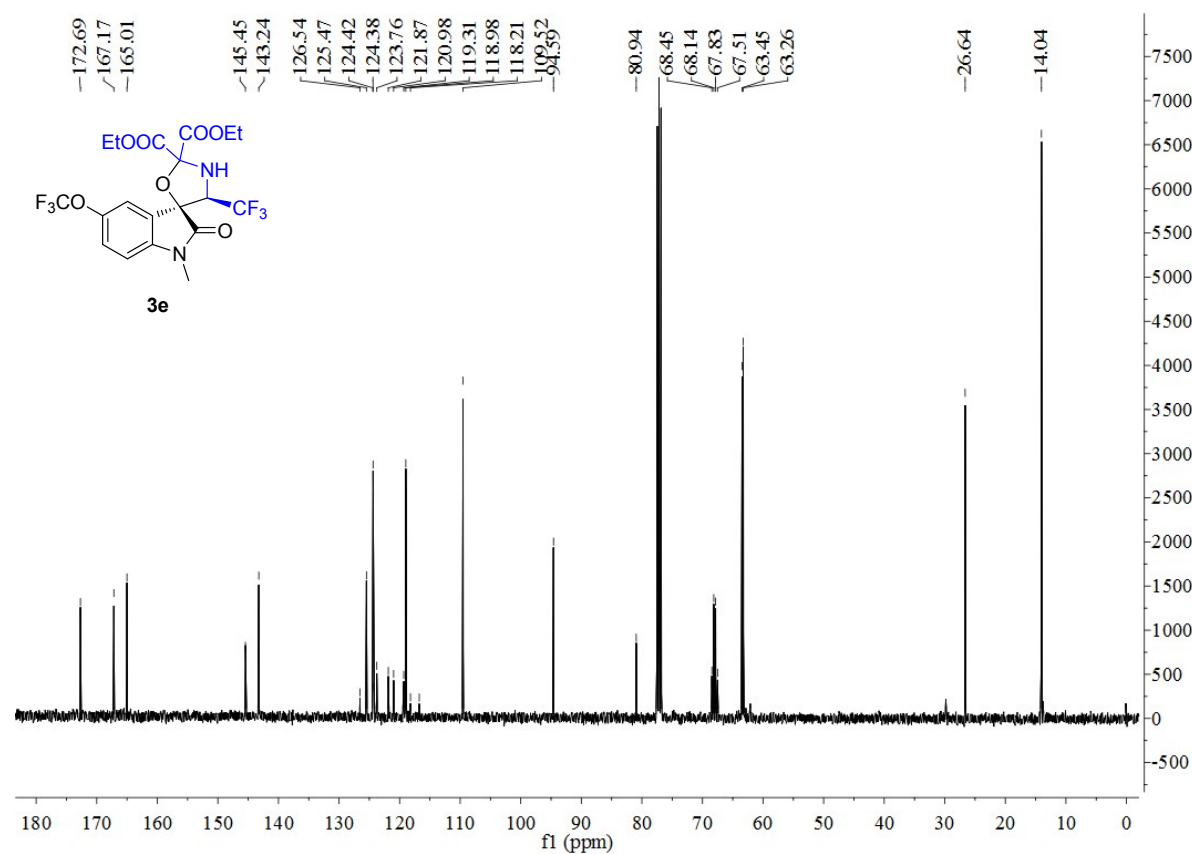

**$^{19}\text{F}$  NMR of compound 3e (in  $\text{CDCl}_3$ )**

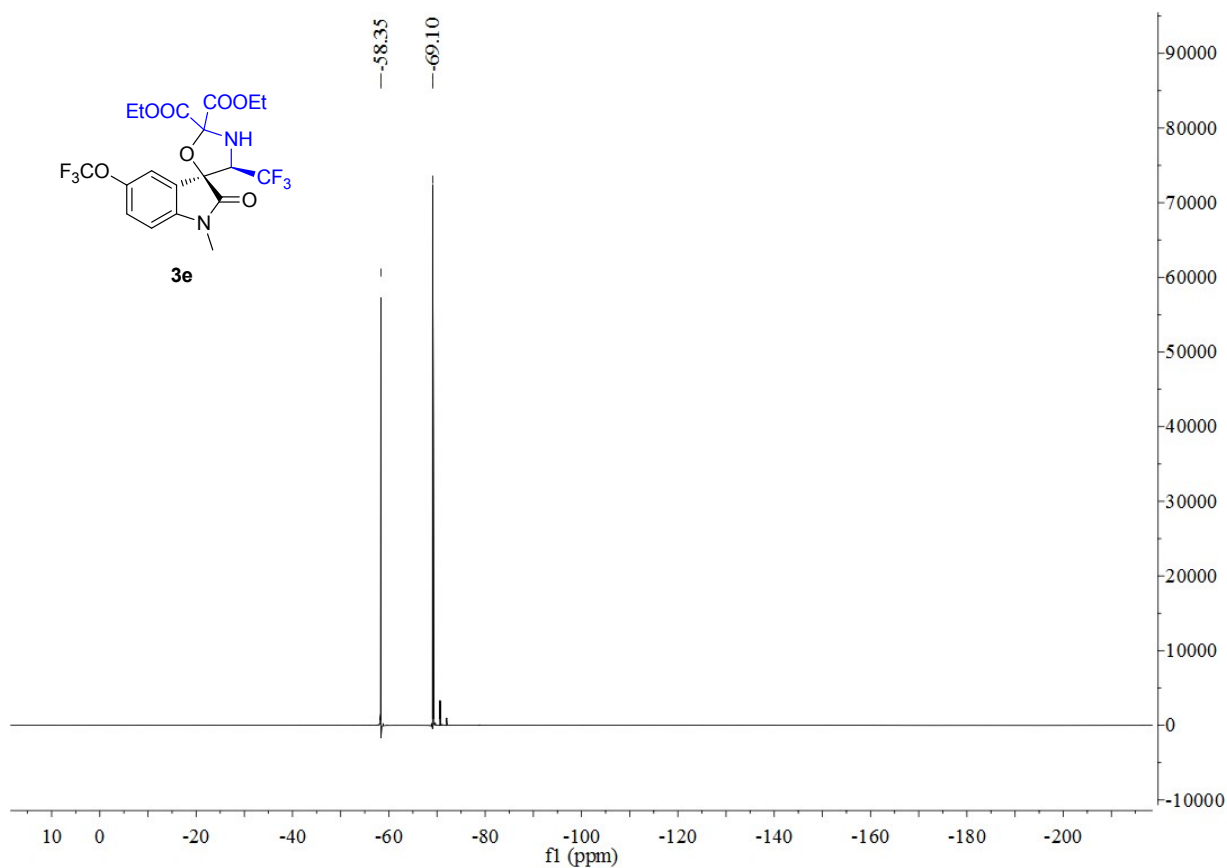

**$^1\text{H}$  NMR of compound 3f (in  $\text{CDCl}_3$ )**

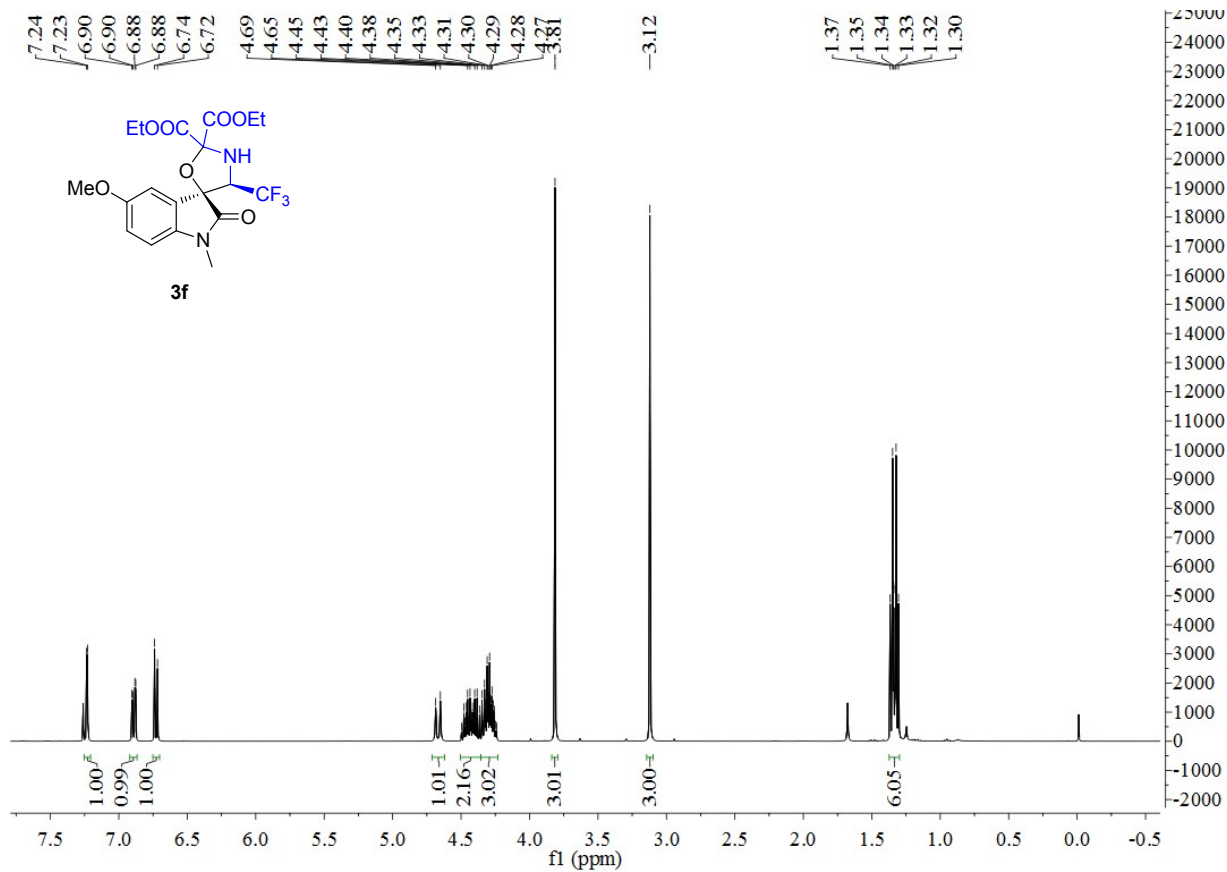



**$^{13}\text{C}$  NMR of compound 3f (in  $\text{CDCl}_3$ )**

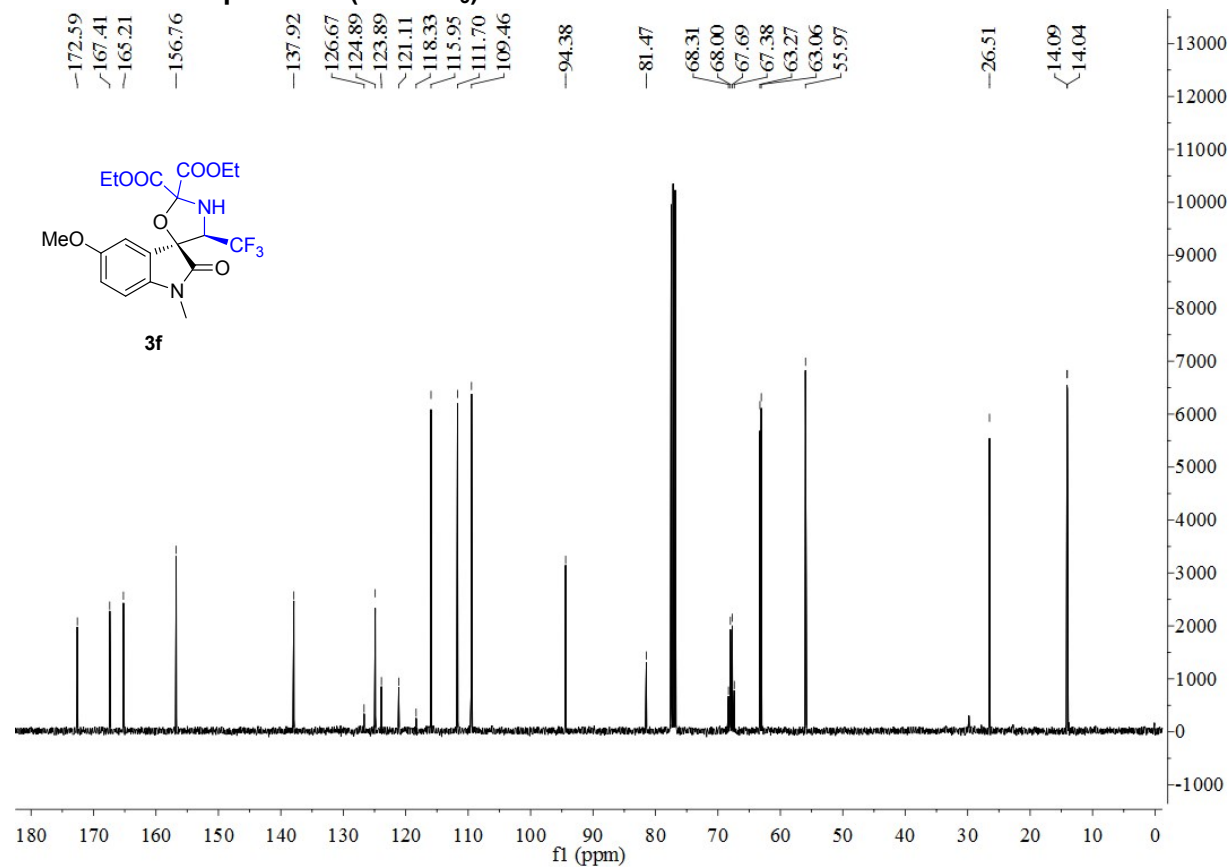

**$^{19}\text{F}$  NMR of compound 3f (in  $\text{CDCl}_3$ )**

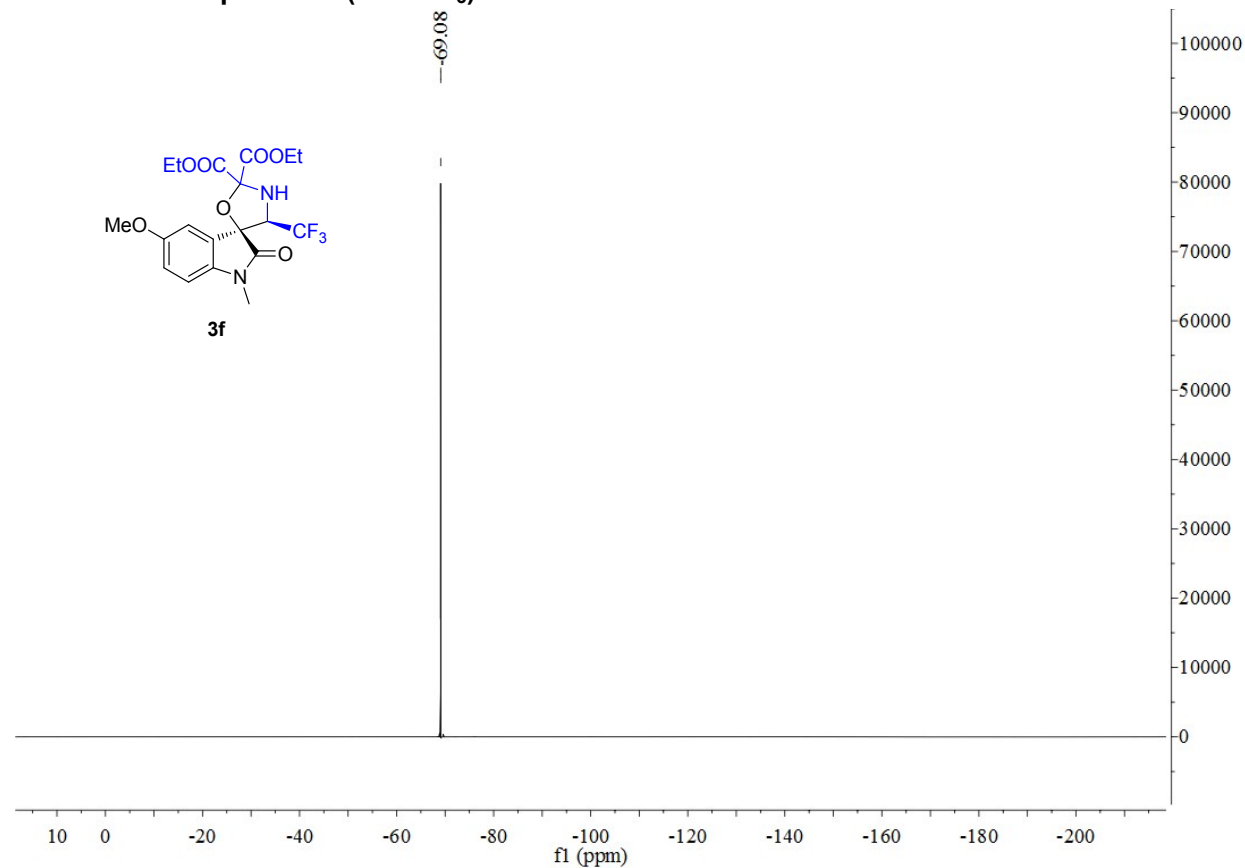

**<sup>1</sup>H NMR of compound 3g (in CDCl<sub>3</sub>)**

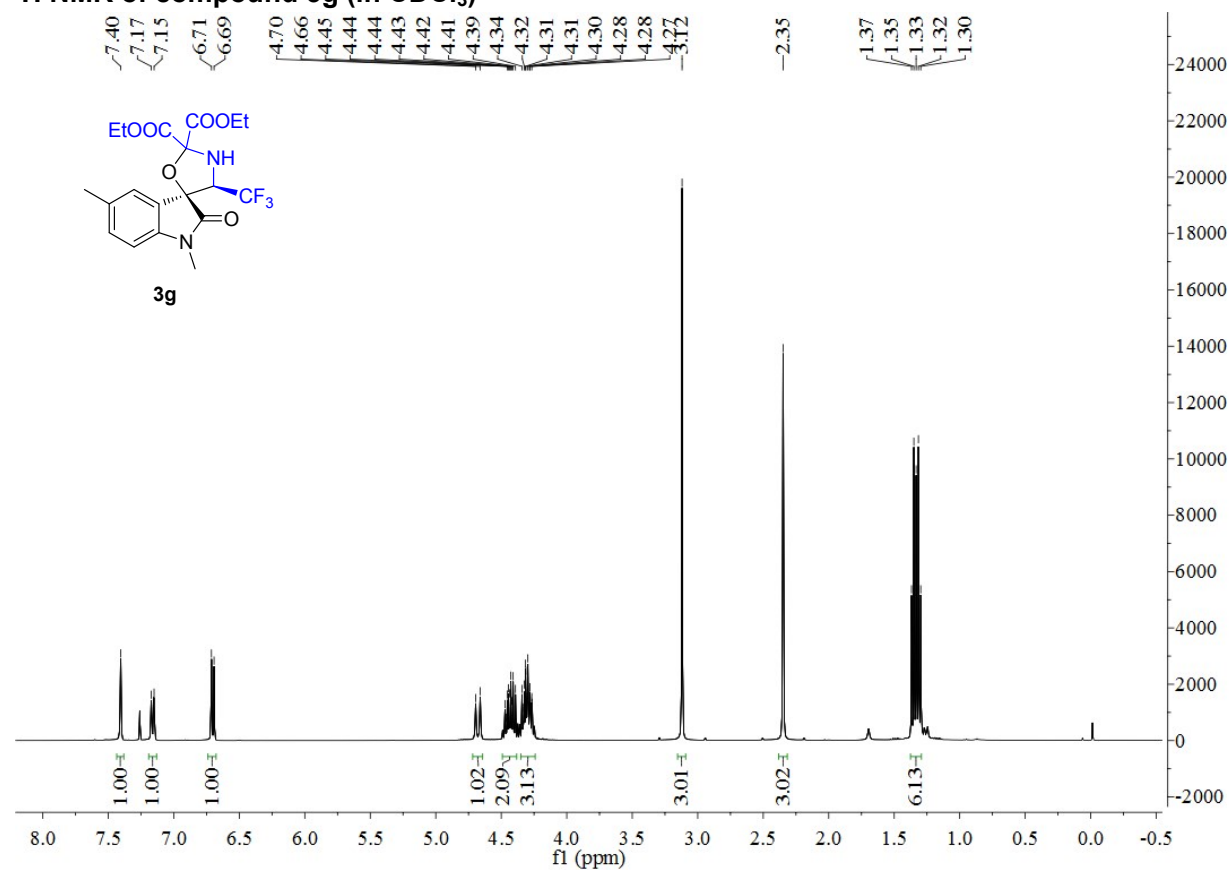

**<sup>13</sup>C NMR of compound 3g (in CDCl<sub>3</sub>)**

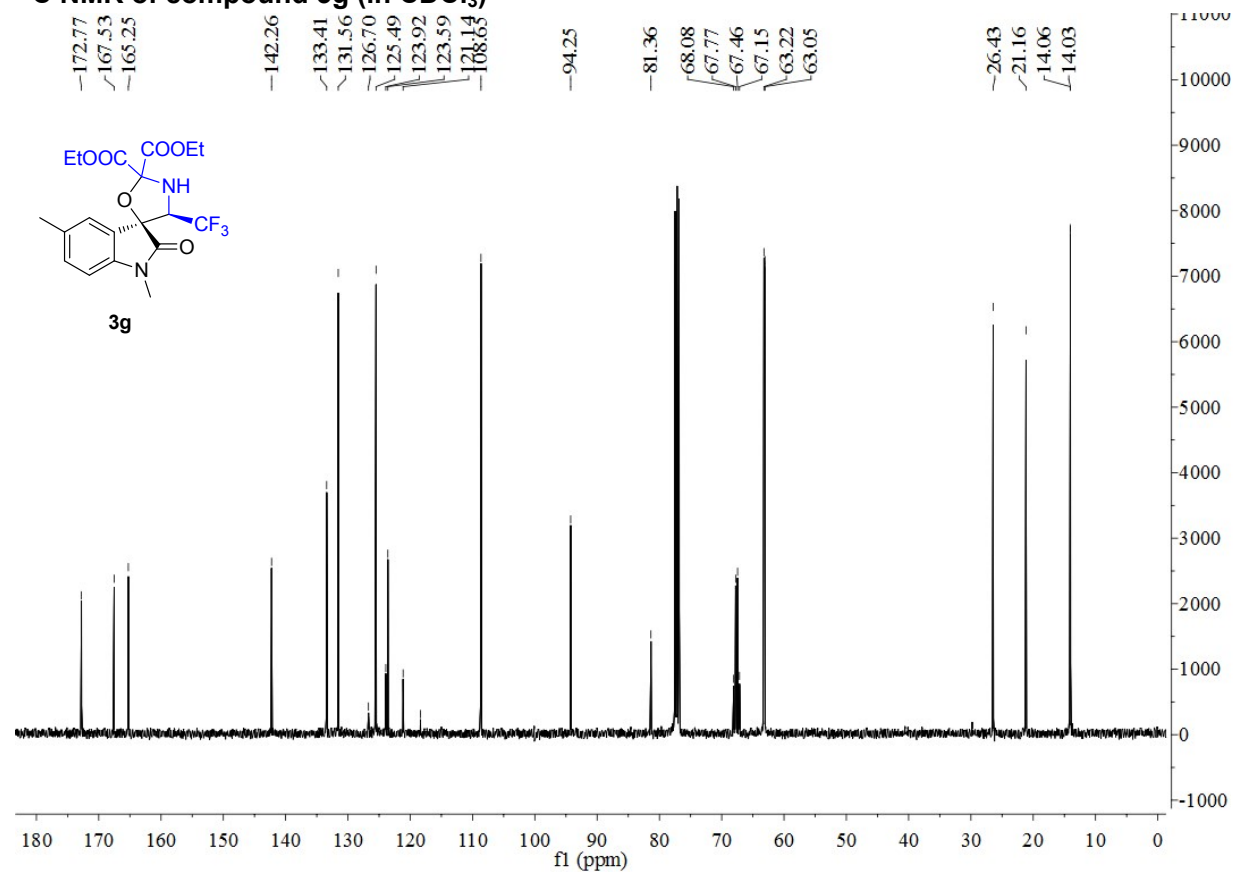

**$^{19}\text{F}$  NMR of compound 3g (in  $\text{CDCl}_3$ )**

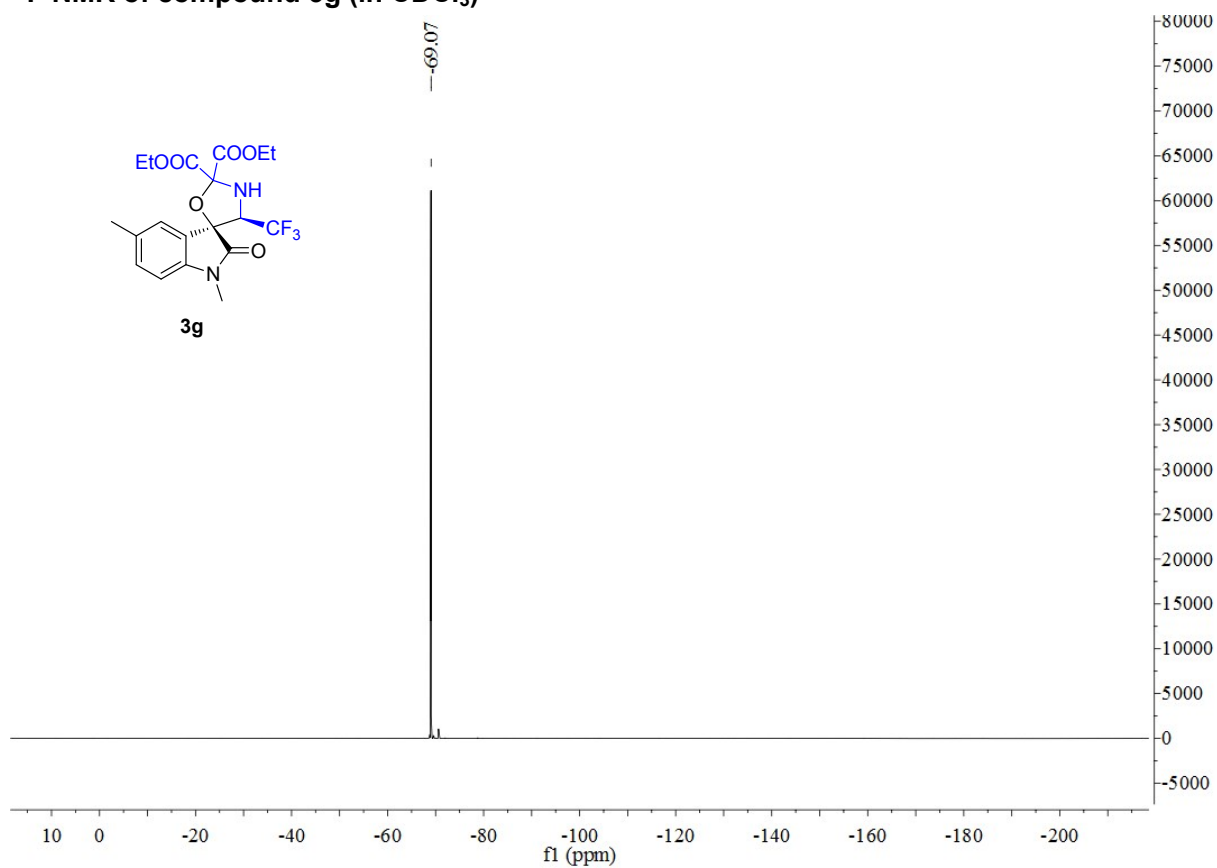

**$^1\text{H}$  NMR of compound 3h (in  $\text{CDCl}_3$ )**

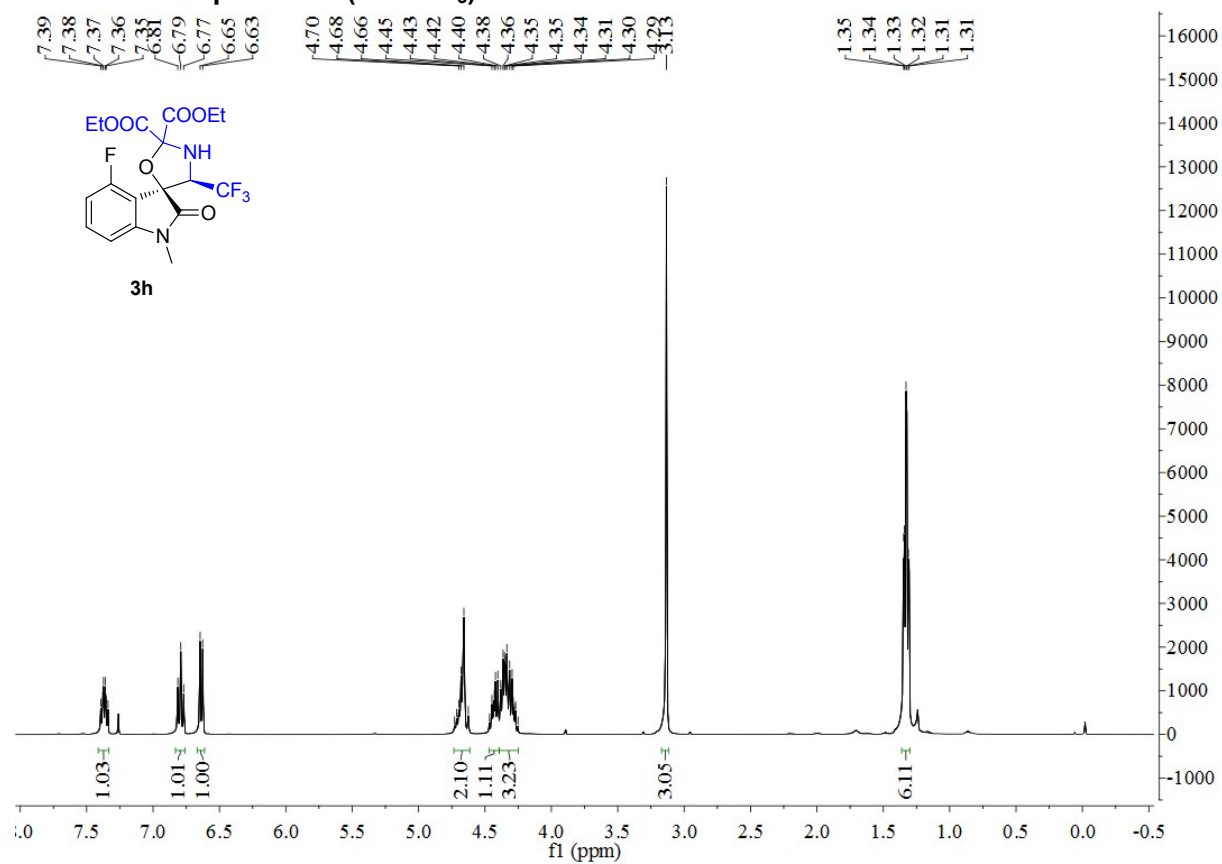

**$^{13}\text{C}$  NMR of compound 3h (in  $\text{CDCl}_3$ )**

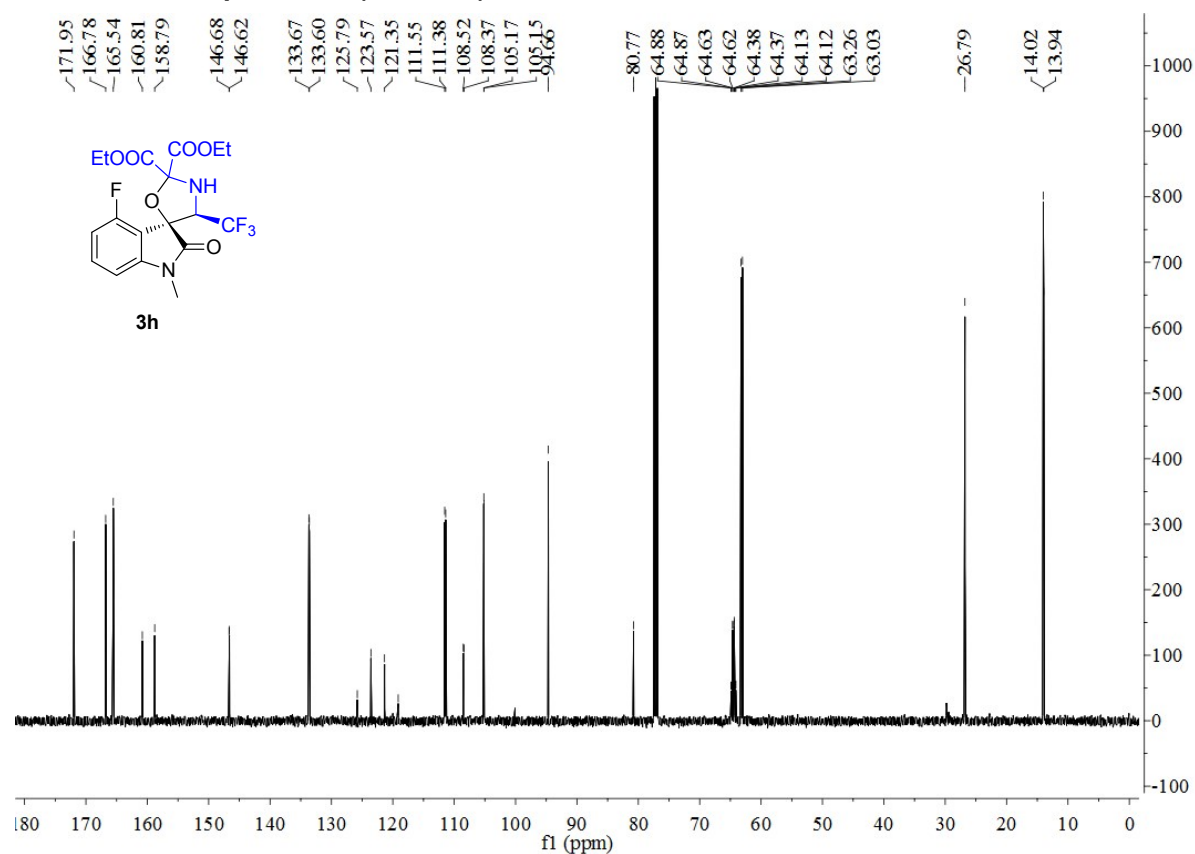

**$^{19}\text{F}$  NMR of compound 3h (in  $\text{CDCl}_3$ )**

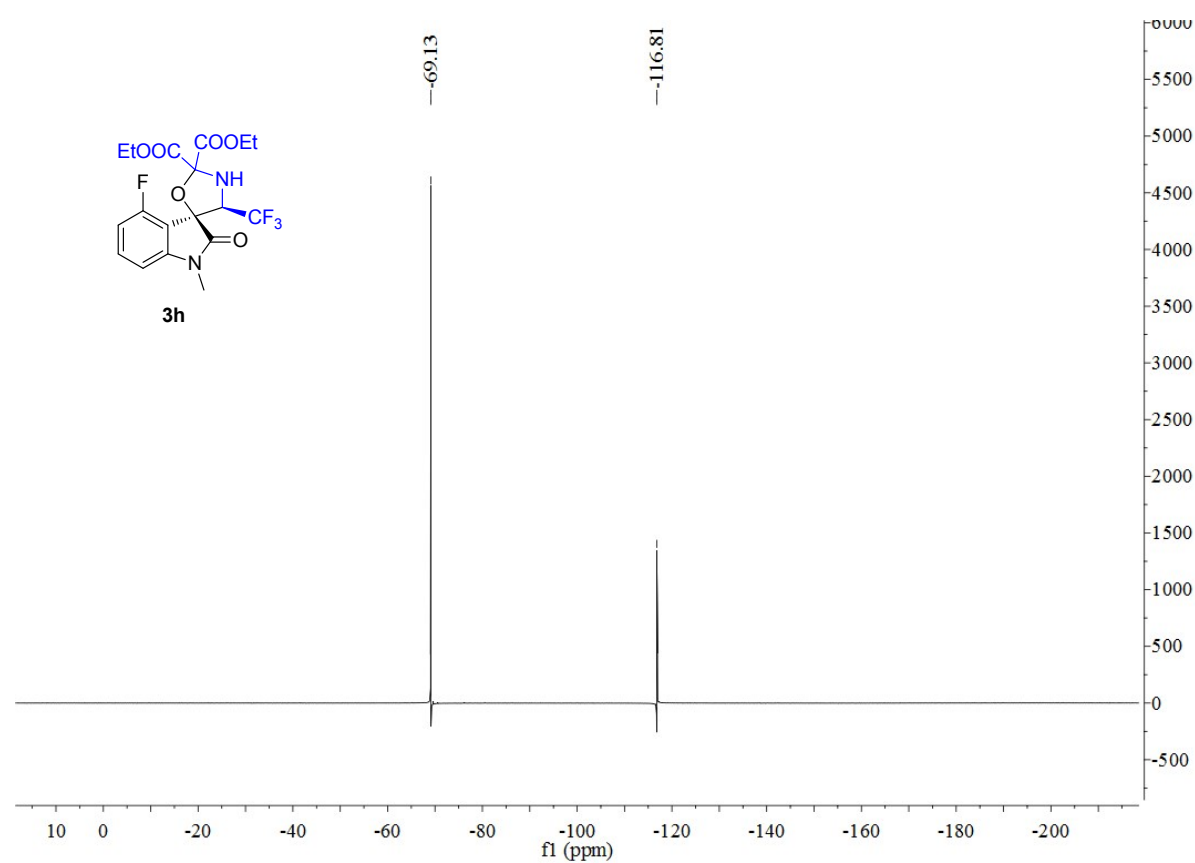

**<sup>1</sup>H NMR of compound 3i (in CDCl<sub>3</sub>)**

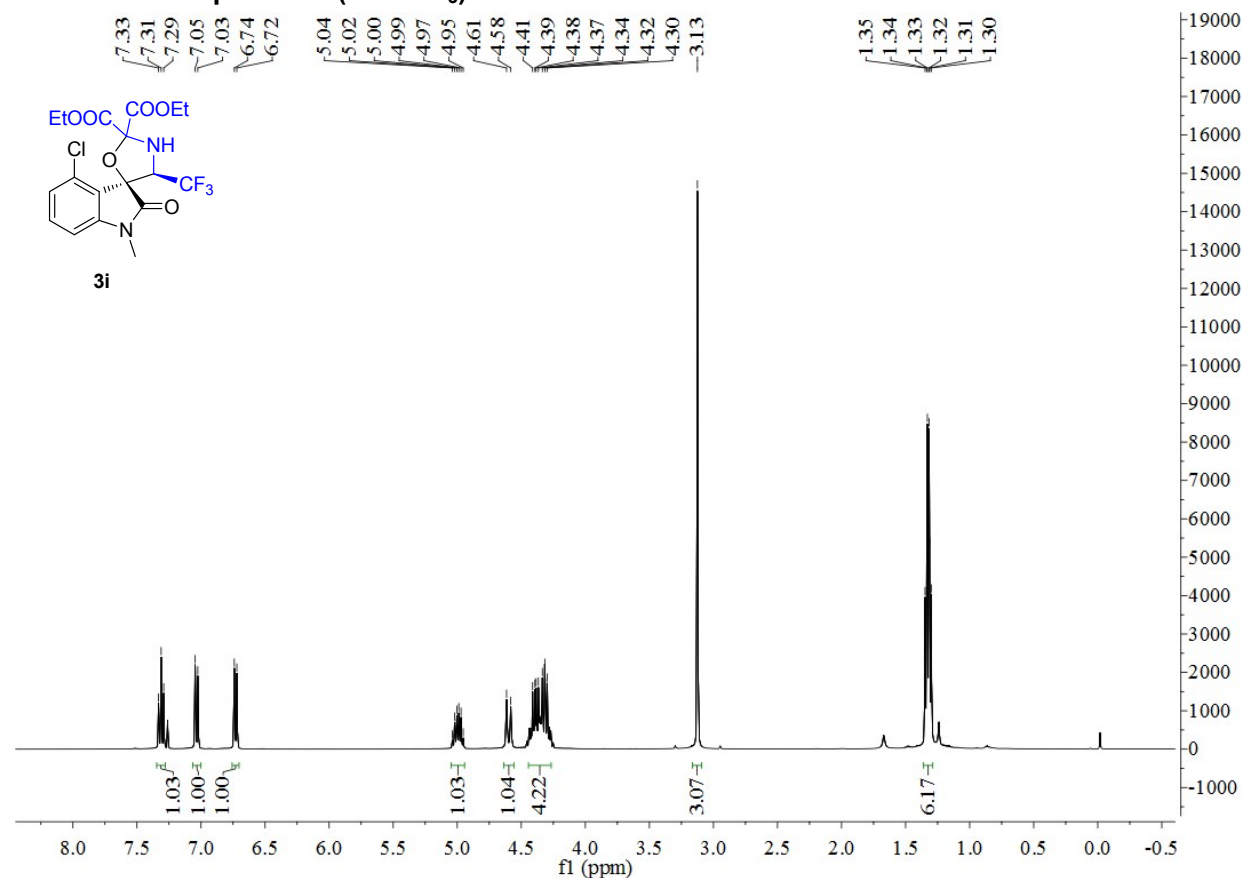

**<sup>13</sup>C NMR of compound 3i (in CDCl<sub>3</sub>)**

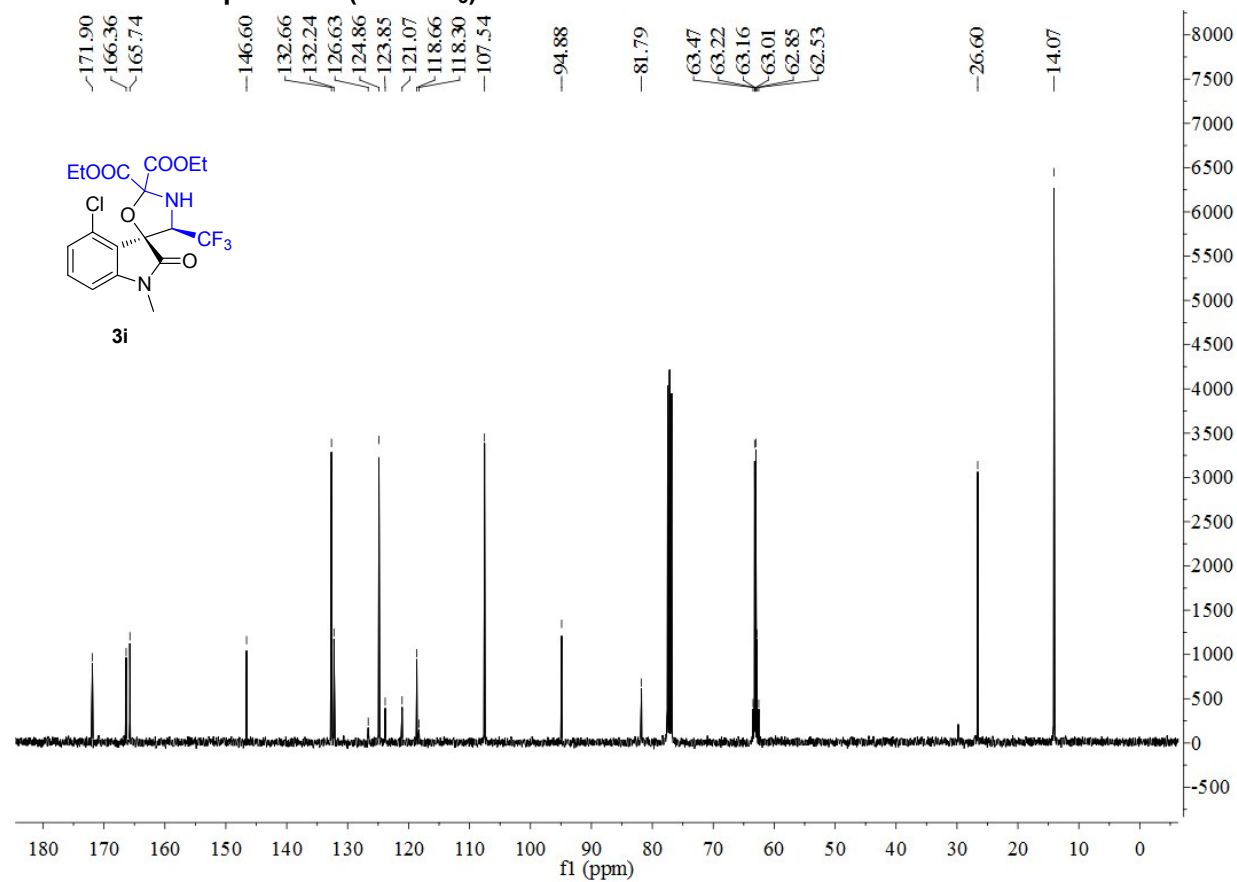

**$^{19}\text{F}$  NMR of compound 3i (in  $\text{CDCl}_3$ )**

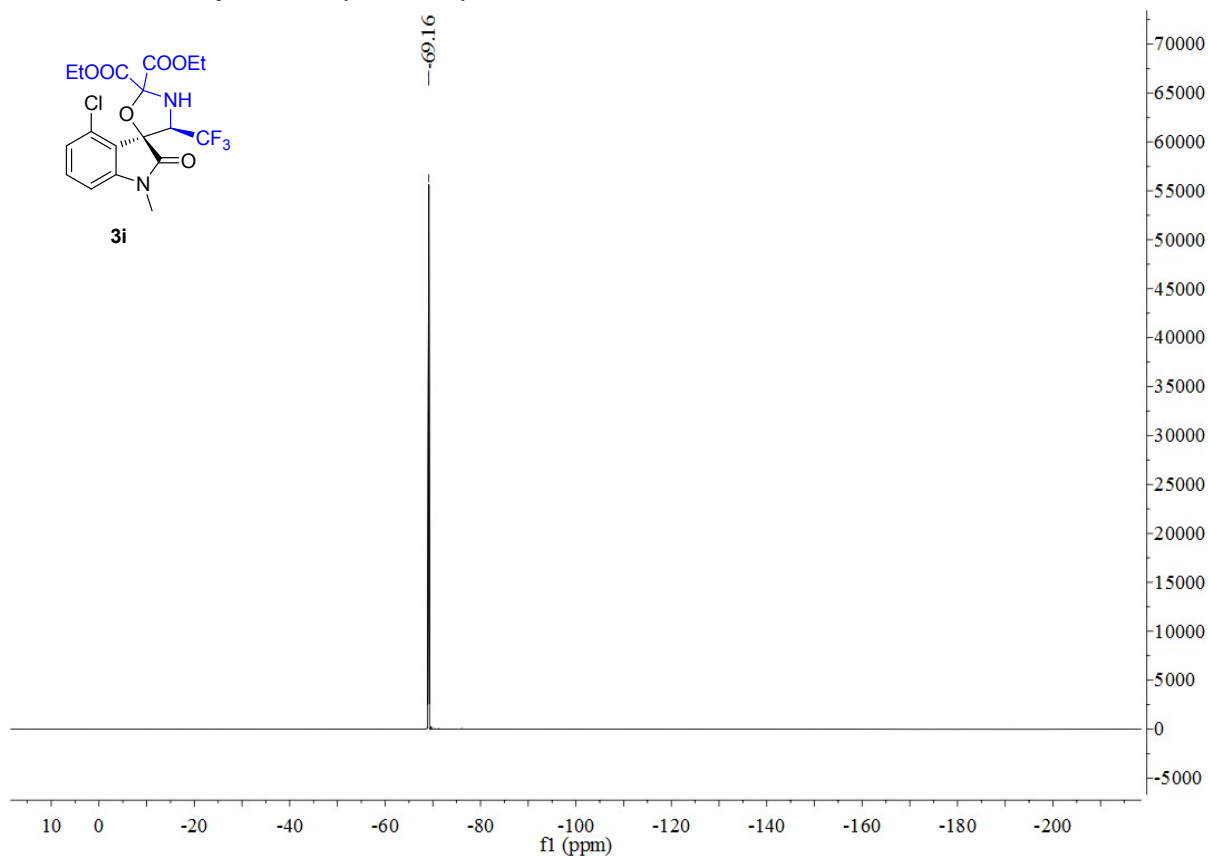

**$^1\text{H}$  NMR of compound 3j (in  $\text{CDCl}_3$ )**

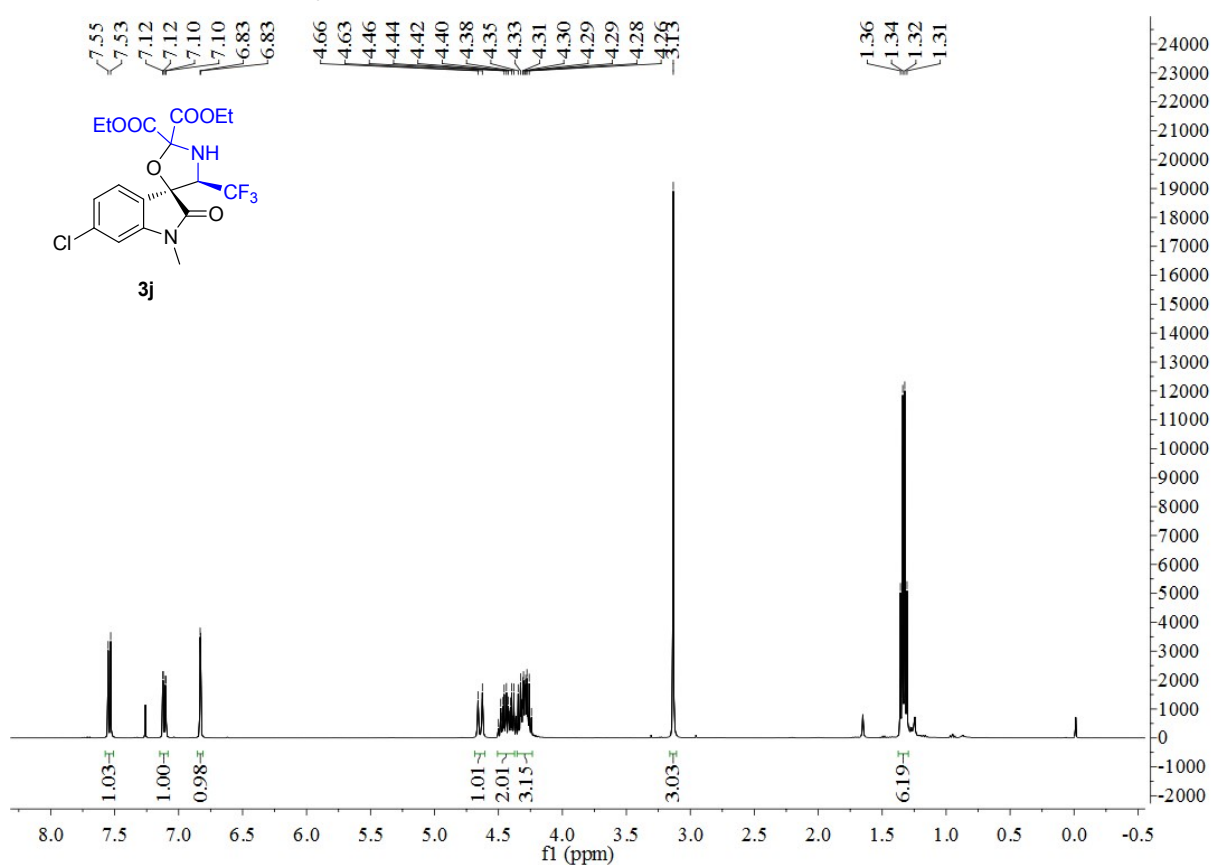

**$^{13}\text{C}$  NMR of compound 3j (in  $\text{CDCl}_3$ )**

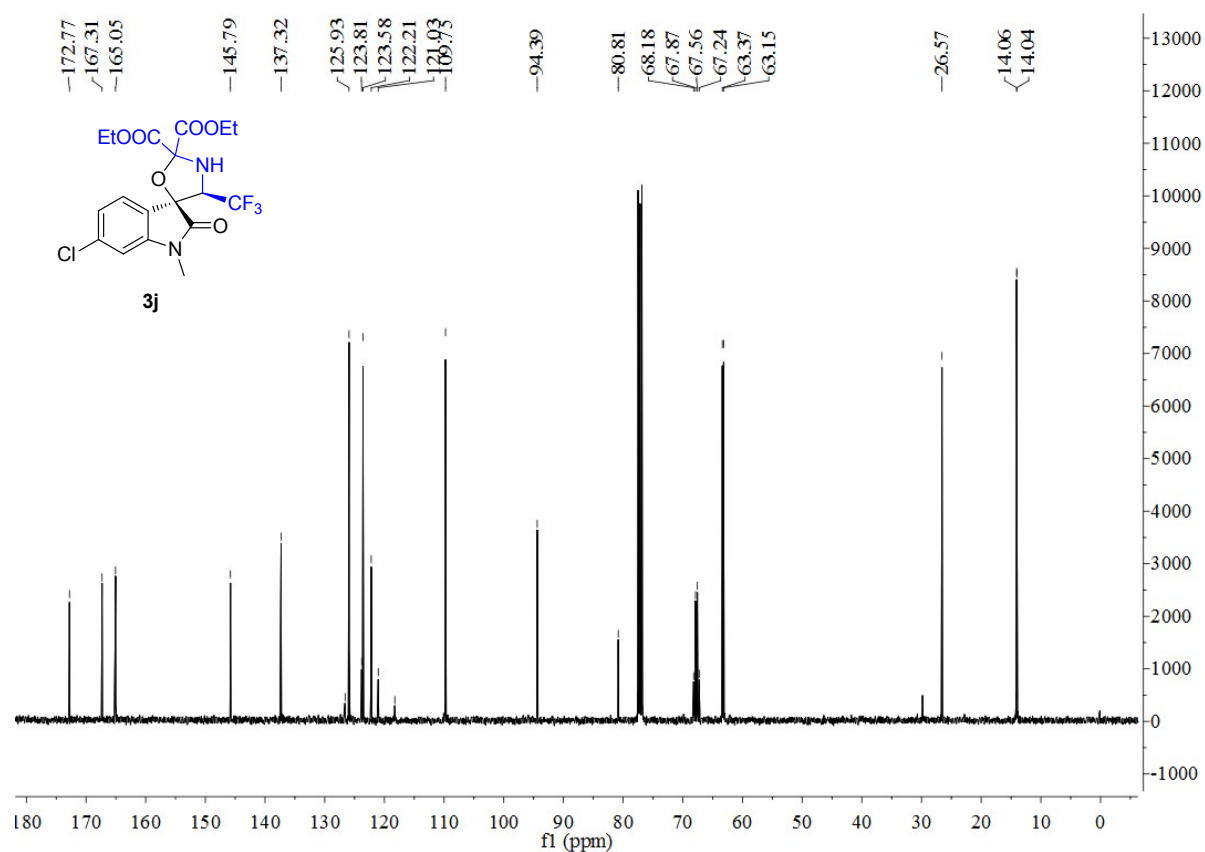

**$^{19}\text{F}$  NMR of compound 3j (in  $\text{CDCl}_3$ )**

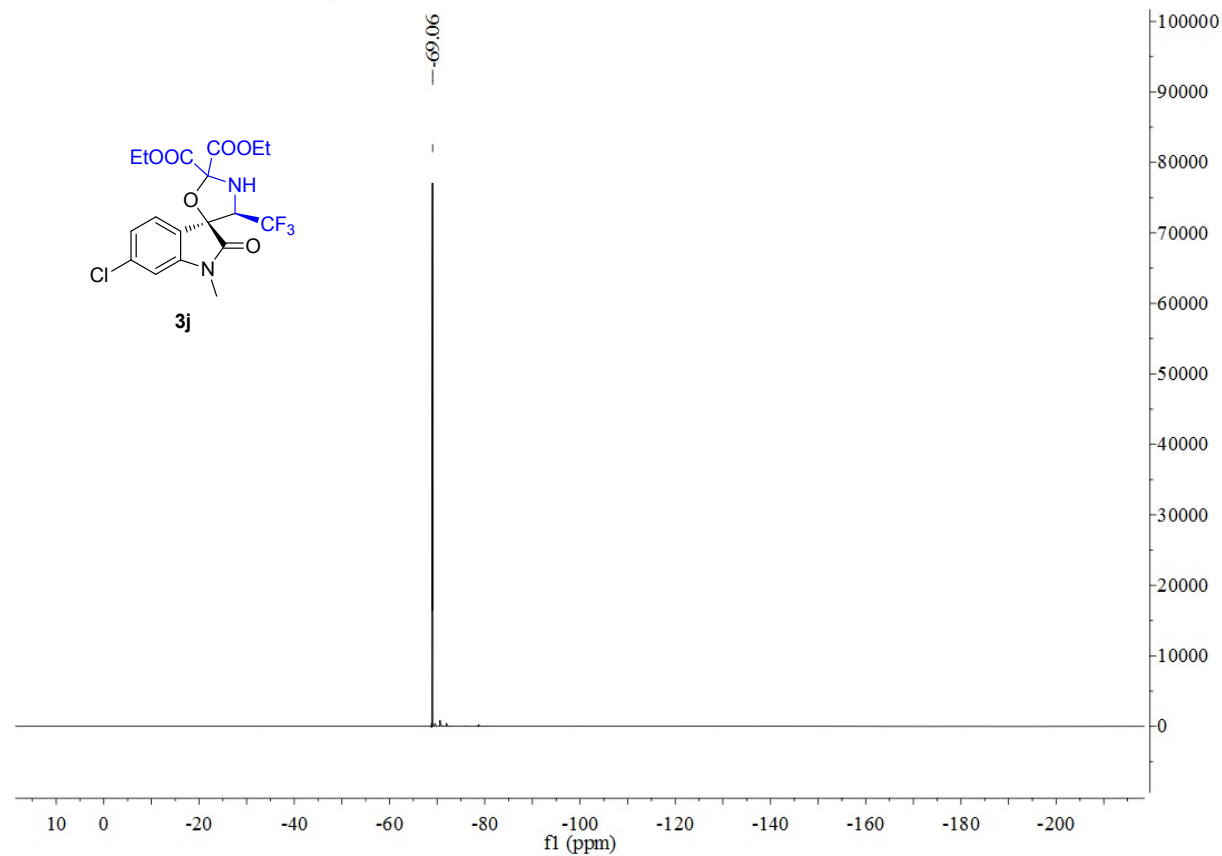

**<sup>1</sup>H NMR of compound 3k (in CDCl<sub>3</sub>)**

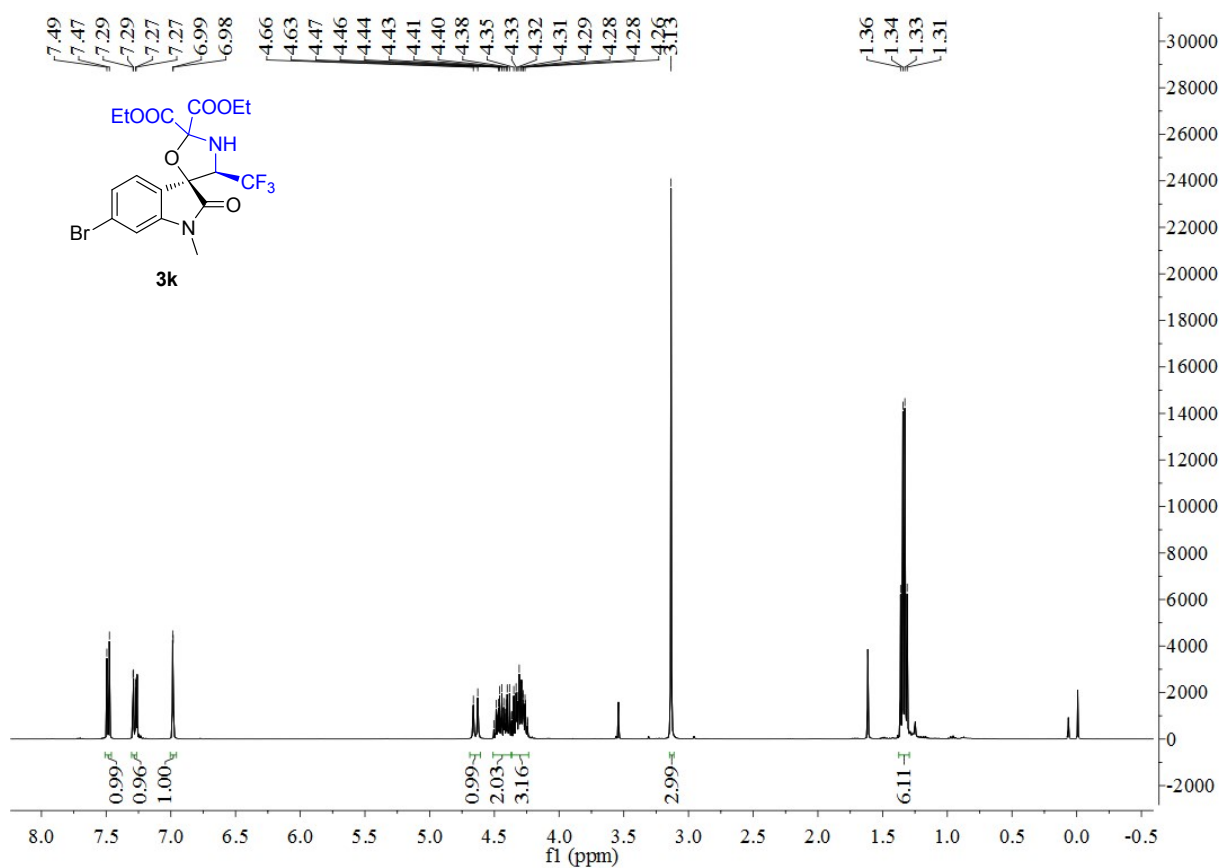

**<sup>13</sup>C NMR of compound 3k (in CDCl<sub>3</sub>)**

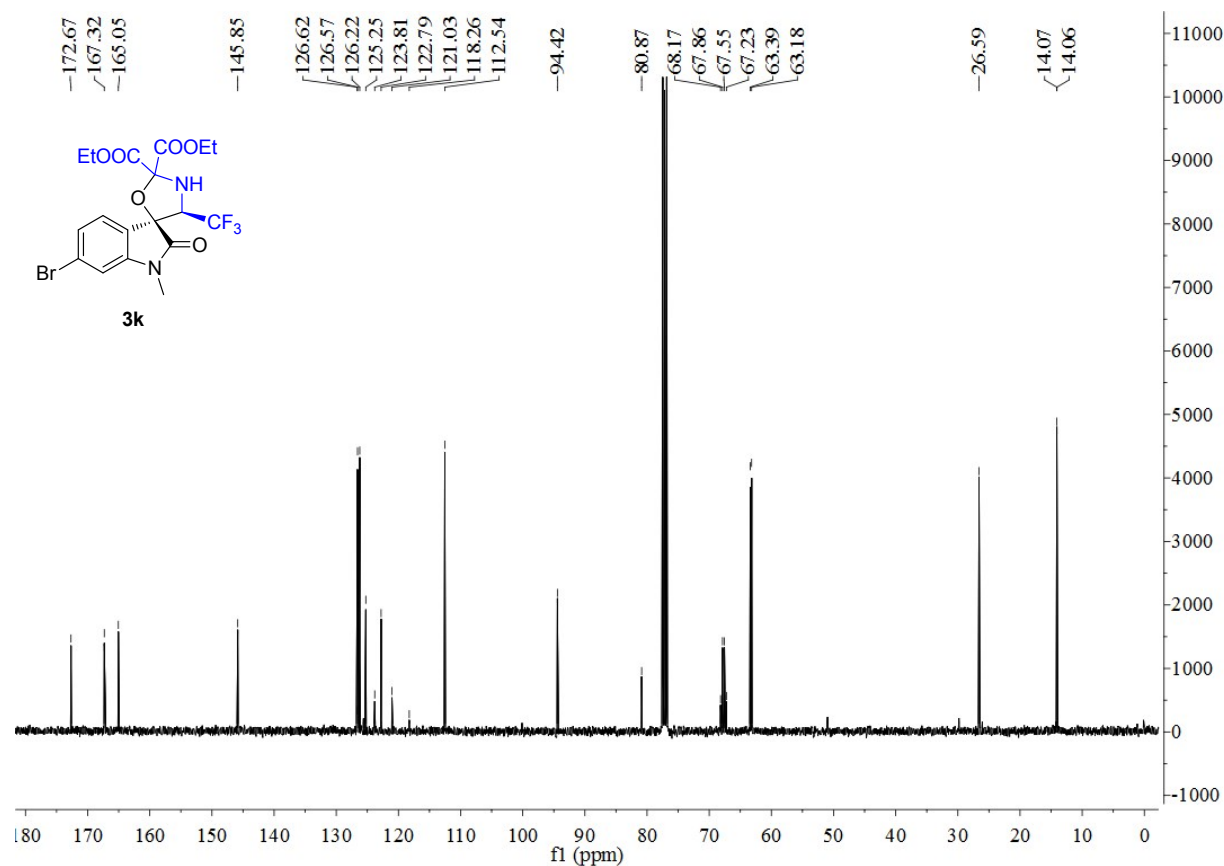



**$^{19}\text{F}$  NMR of compound 3k (in  $\text{CDCl}_3$ )**

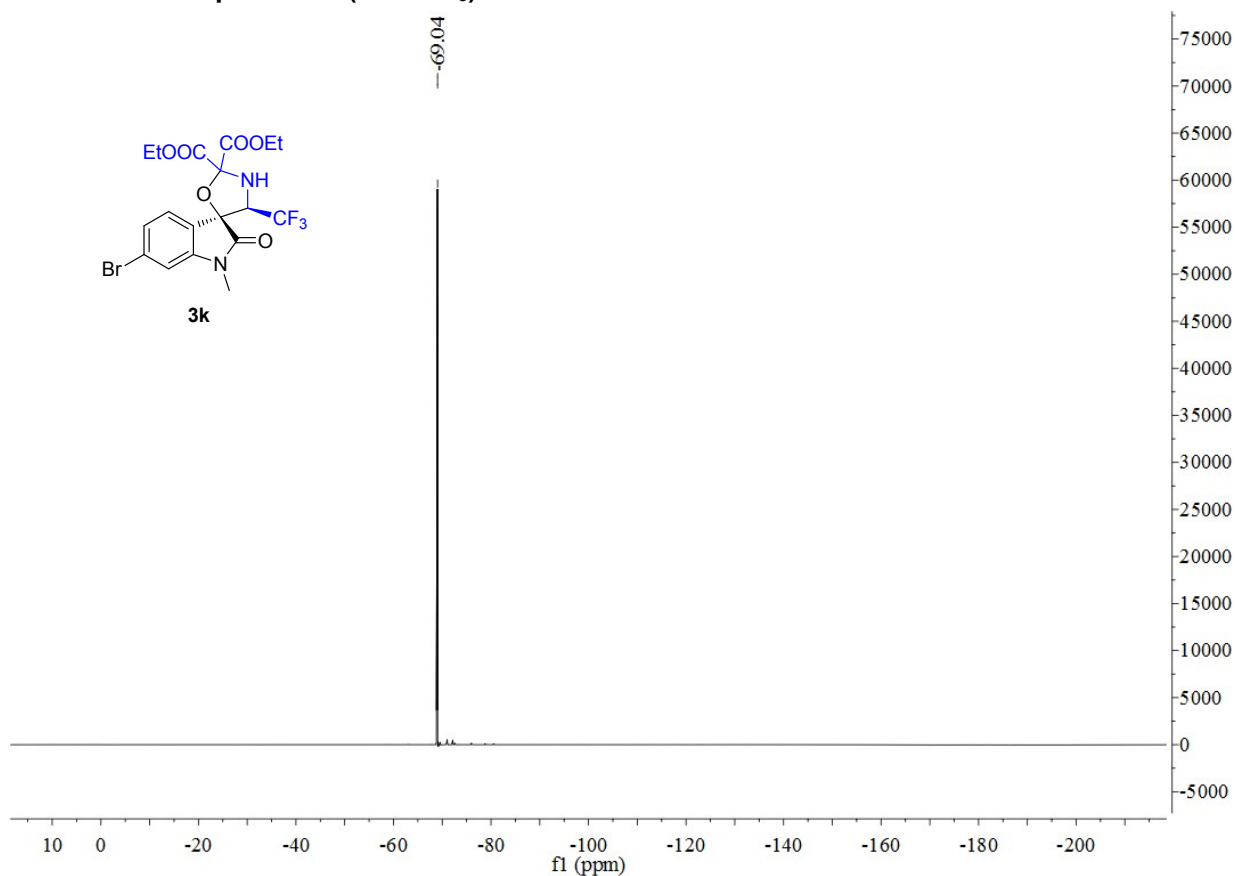

**$^1\text{H}$  NMR of compound 3l (in  $\text{CDCl}_3$ )**

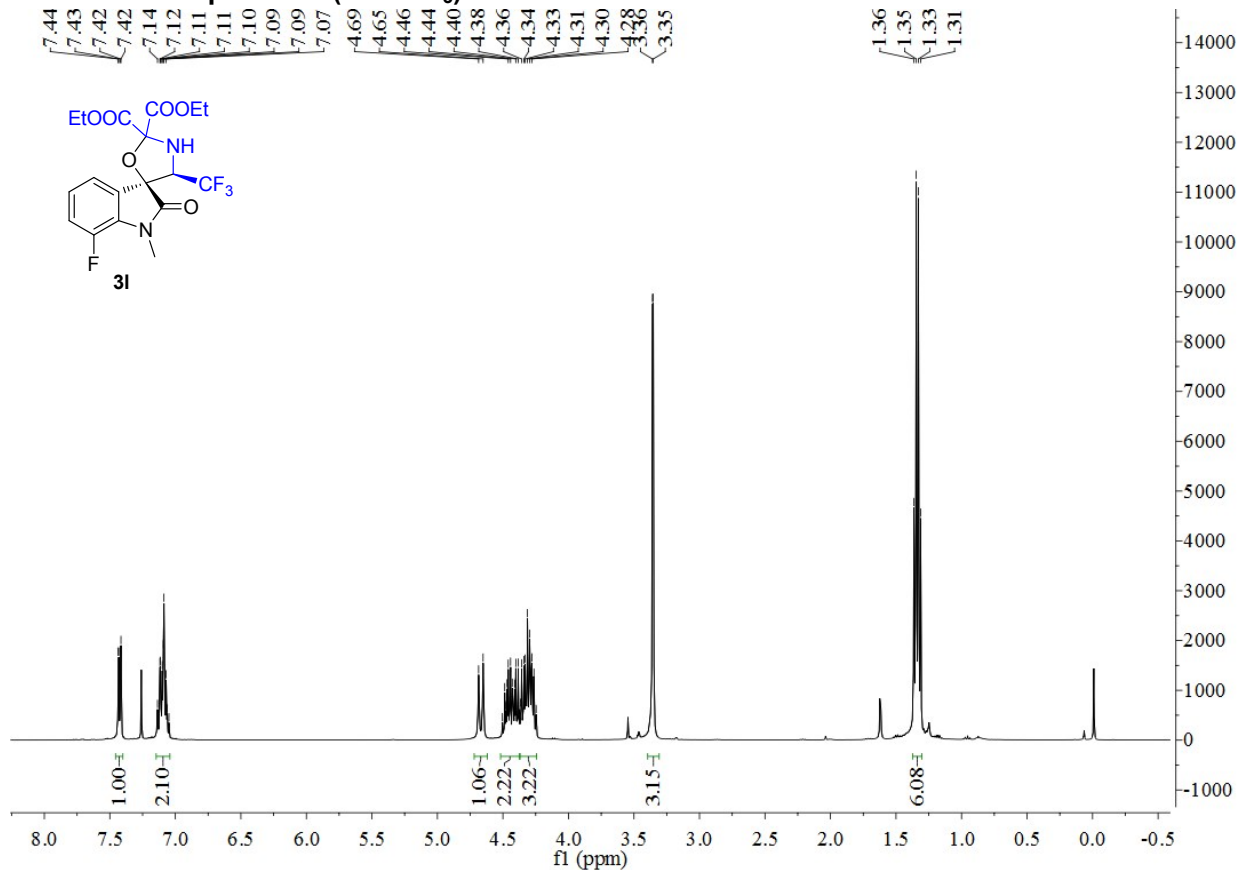

**<sup>13</sup>C NMR of compound 3I (in CDCl<sub>3</sub>)**

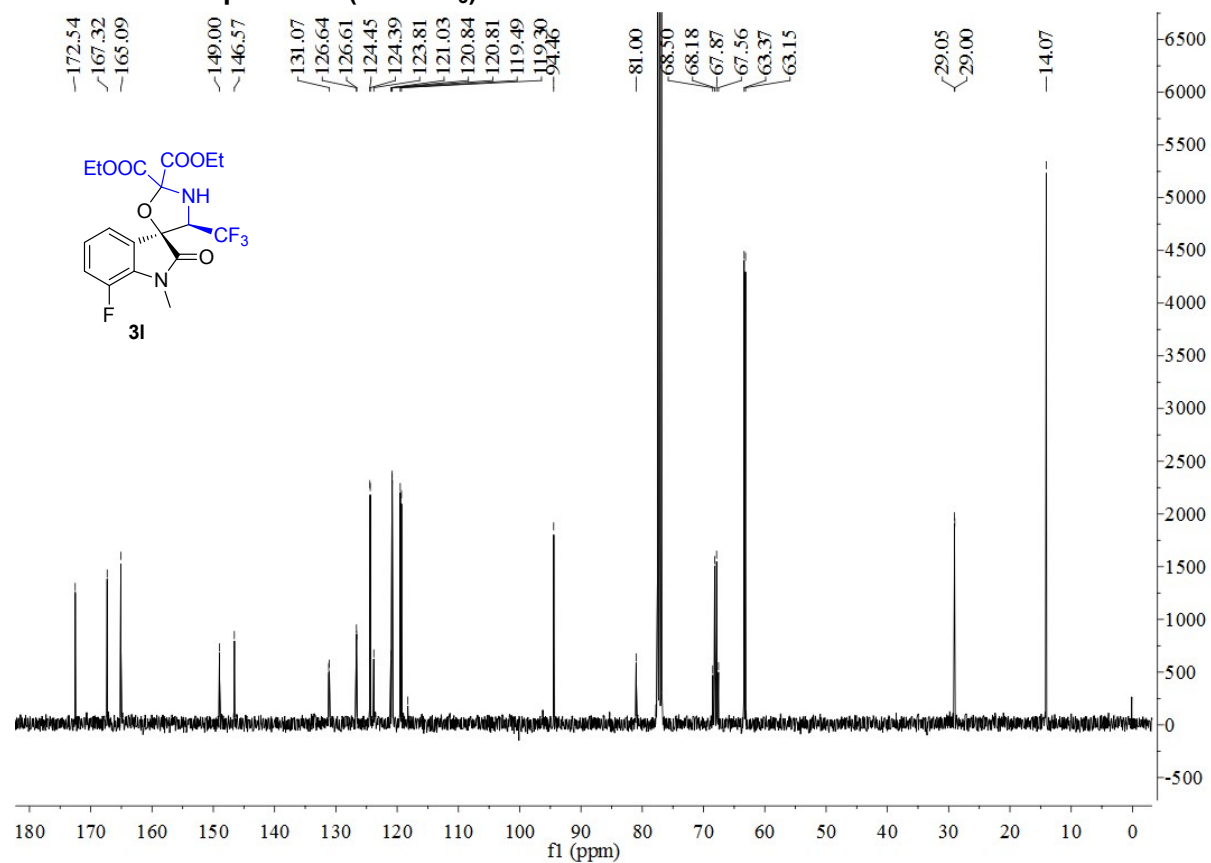

**<sup>19</sup>F NMR of compound 3I (in CDCl<sub>3</sub>)**

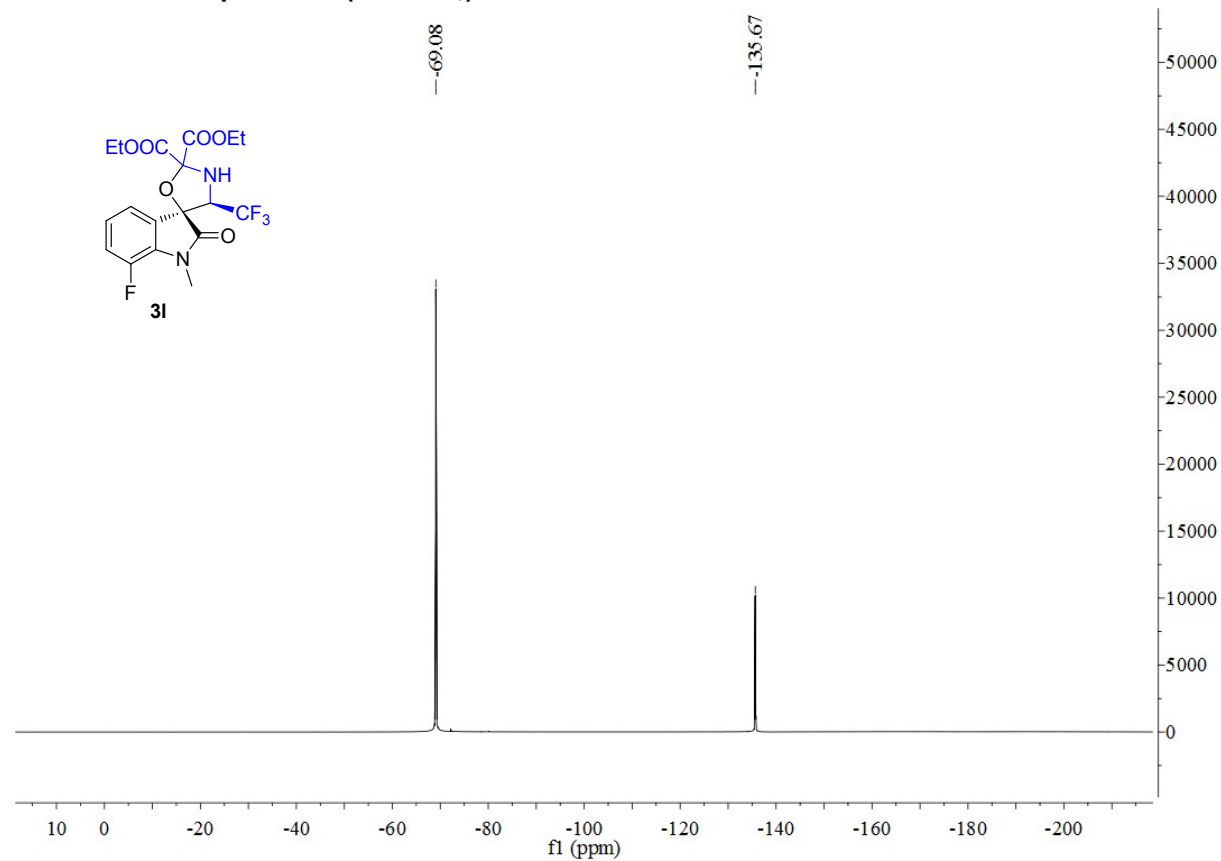

**<sup>1</sup>H NMR of compound 3m (in CDCl<sub>3</sub>)**

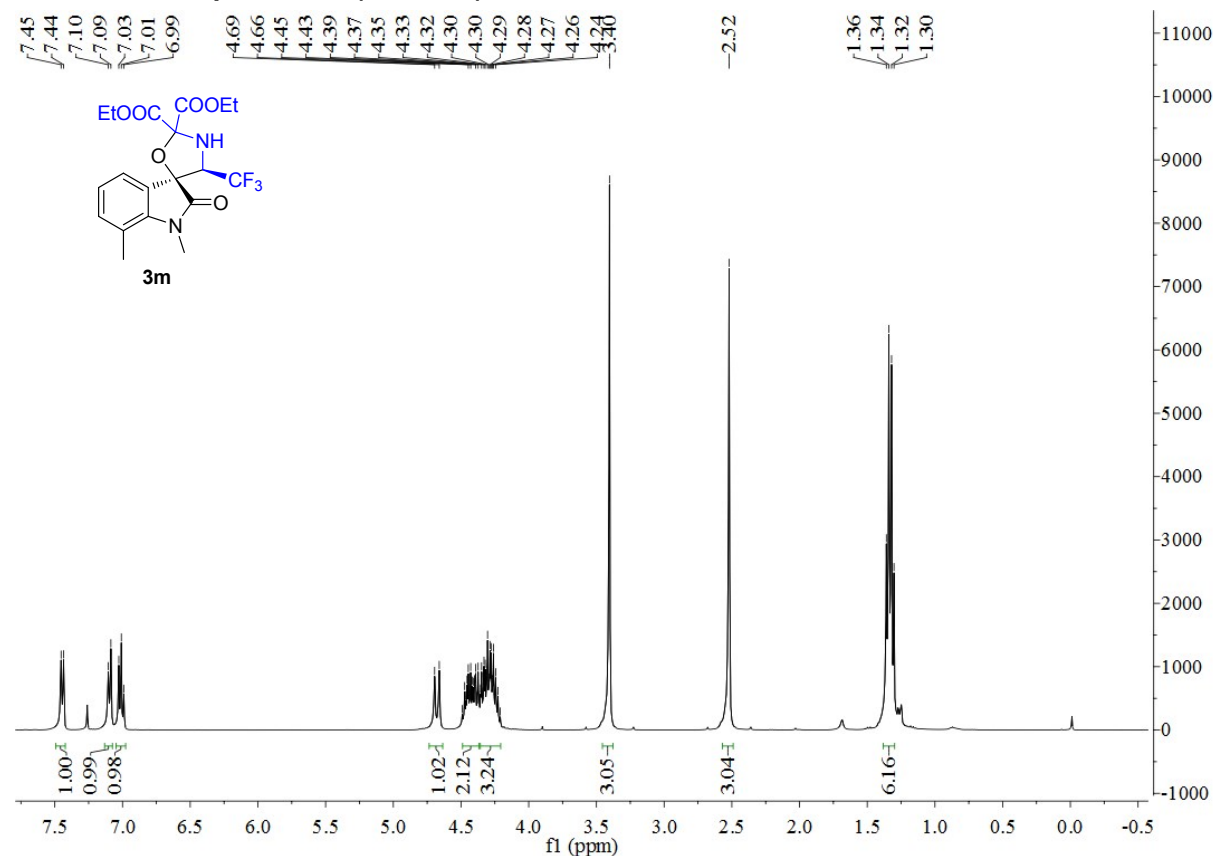

**<sup>13</sup>C NMR of compound 3m (in CDCl<sub>3</sub>)**

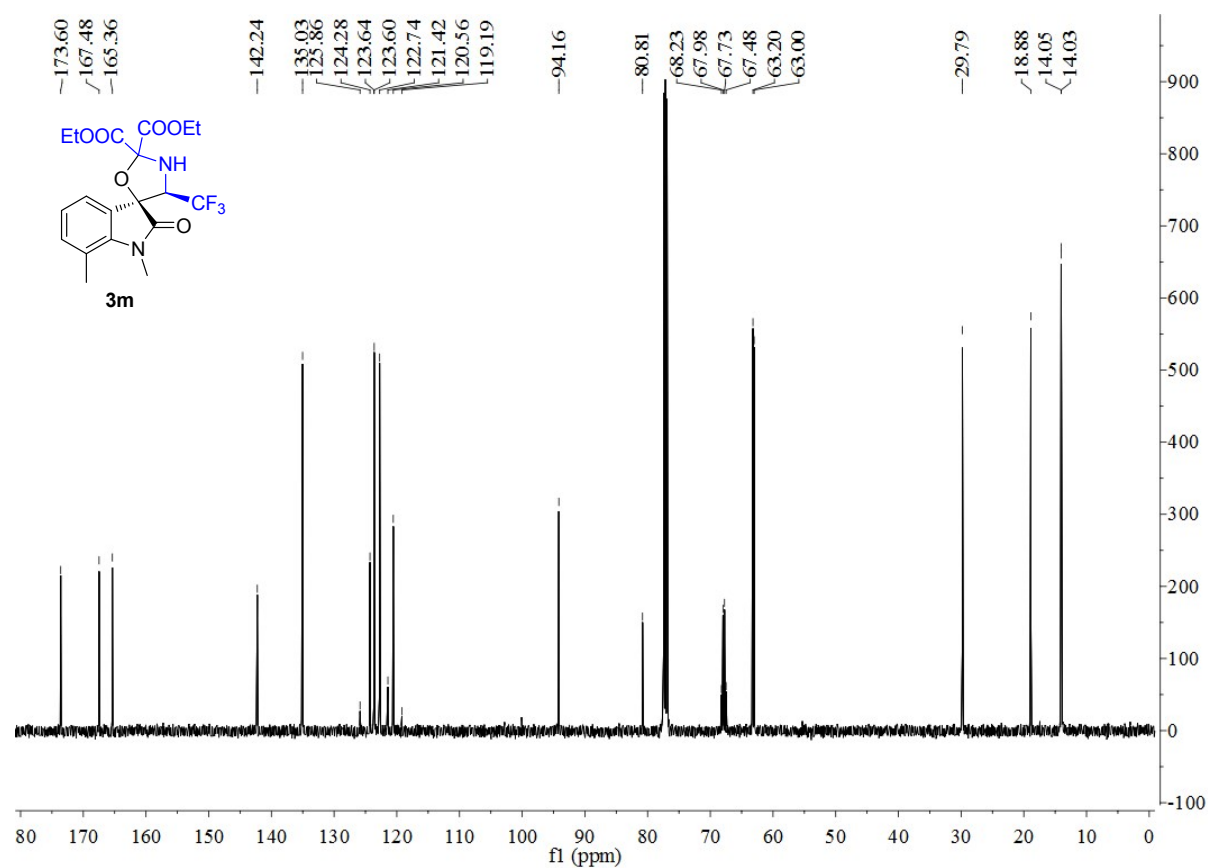

**$^{19}\text{F}$  NMR of compound 3m (in  $\text{CDCl}_3$ )**

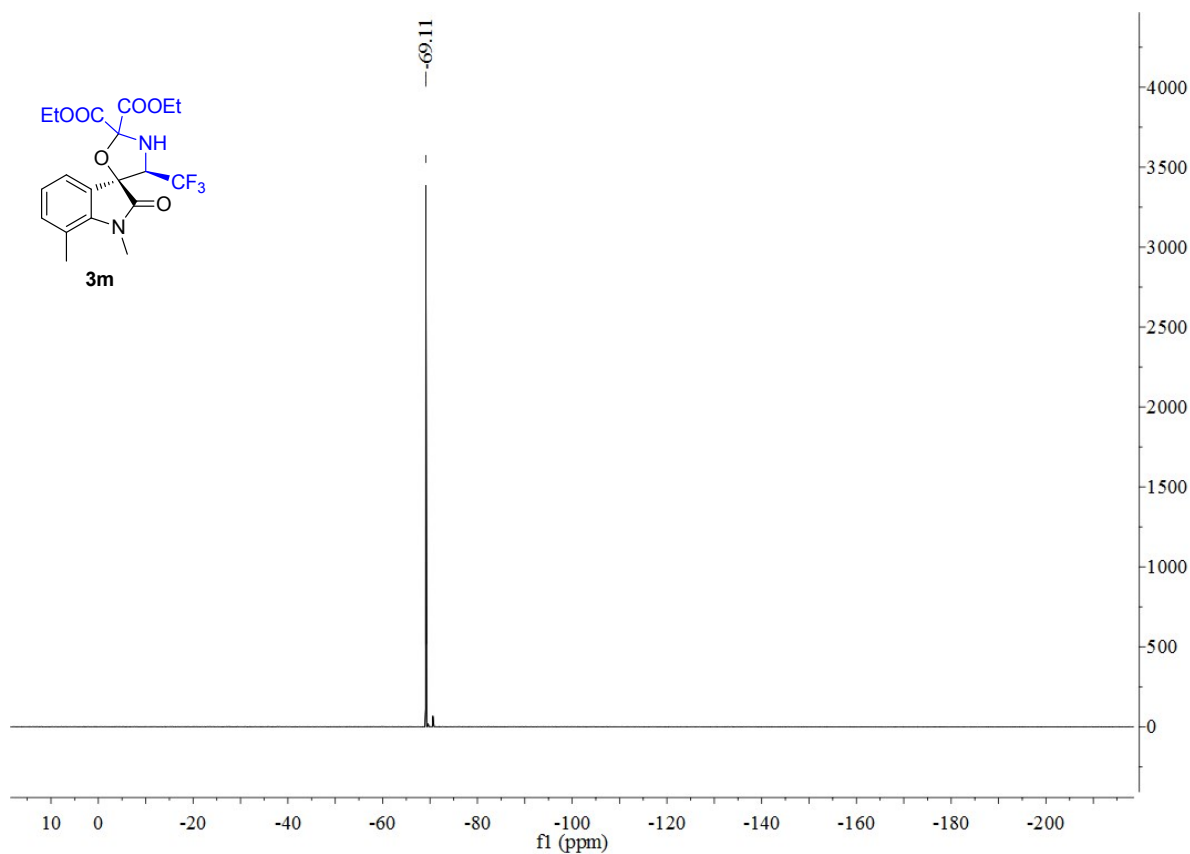

**$^1\text{H}$  NMR of compound 3n (in  $\text{CDCl}_3$ )**

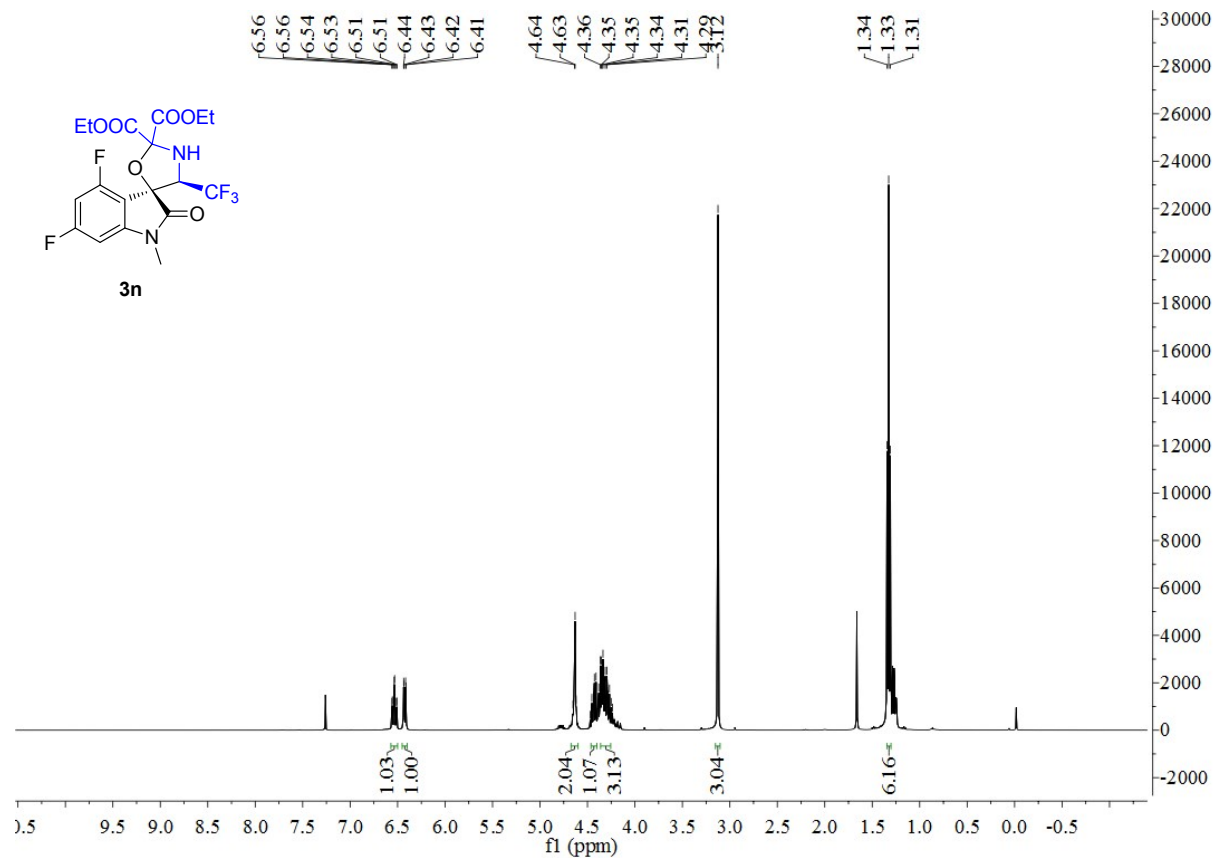

**$^{13}\text{C}$  NMR of compound 3n (in  $\text{CDCl}_3$ )**

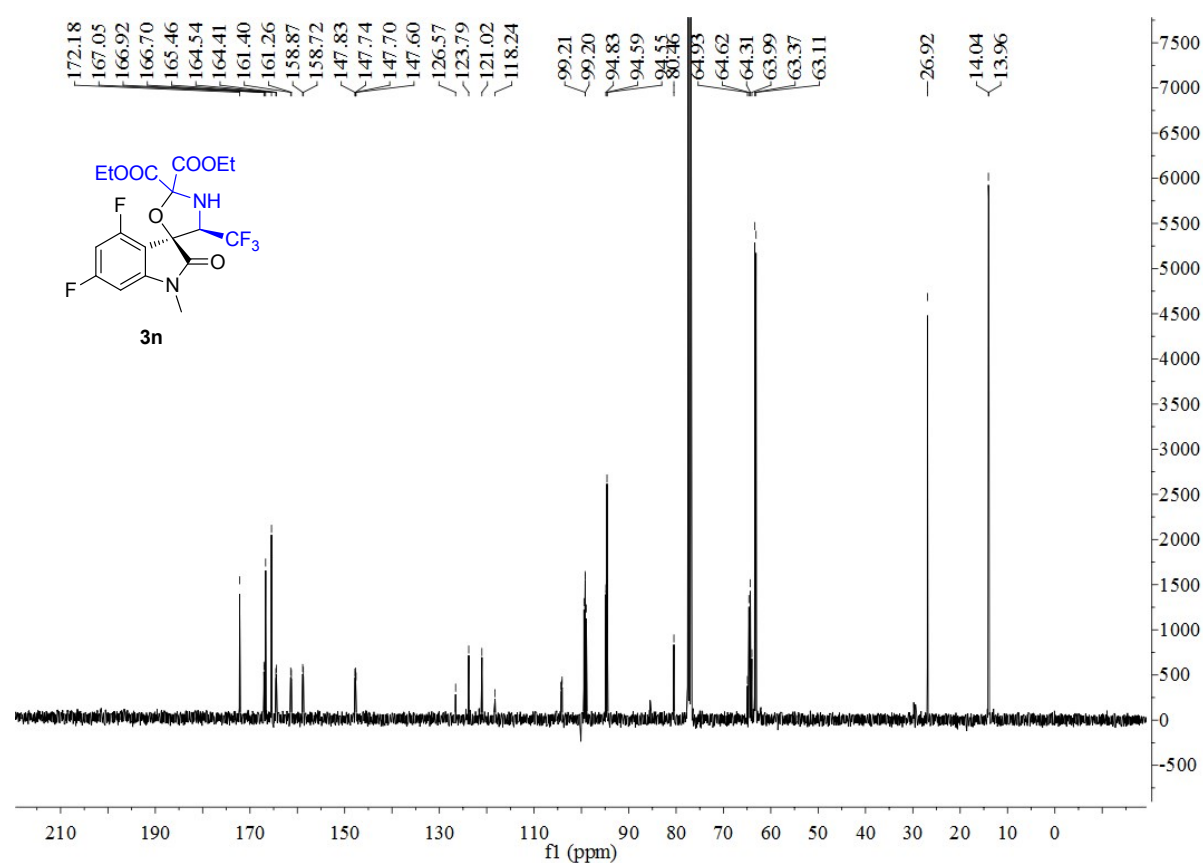

**$^{19}\text{F}$  NMR of compound 3n (in  $\text{CDCl}_3$ )**

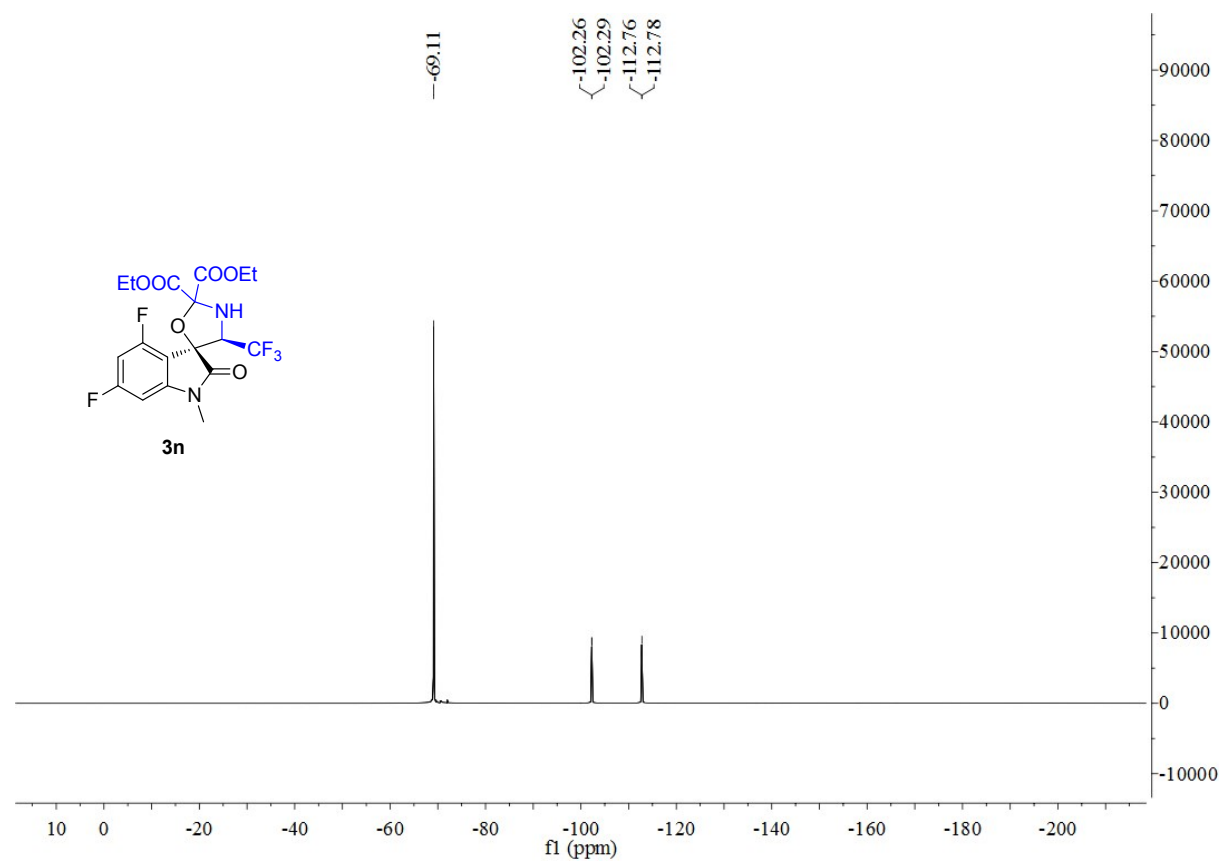

**<sup>1</sup>H NMR of compound 3o (in CDCl<sub>3</sub>)**

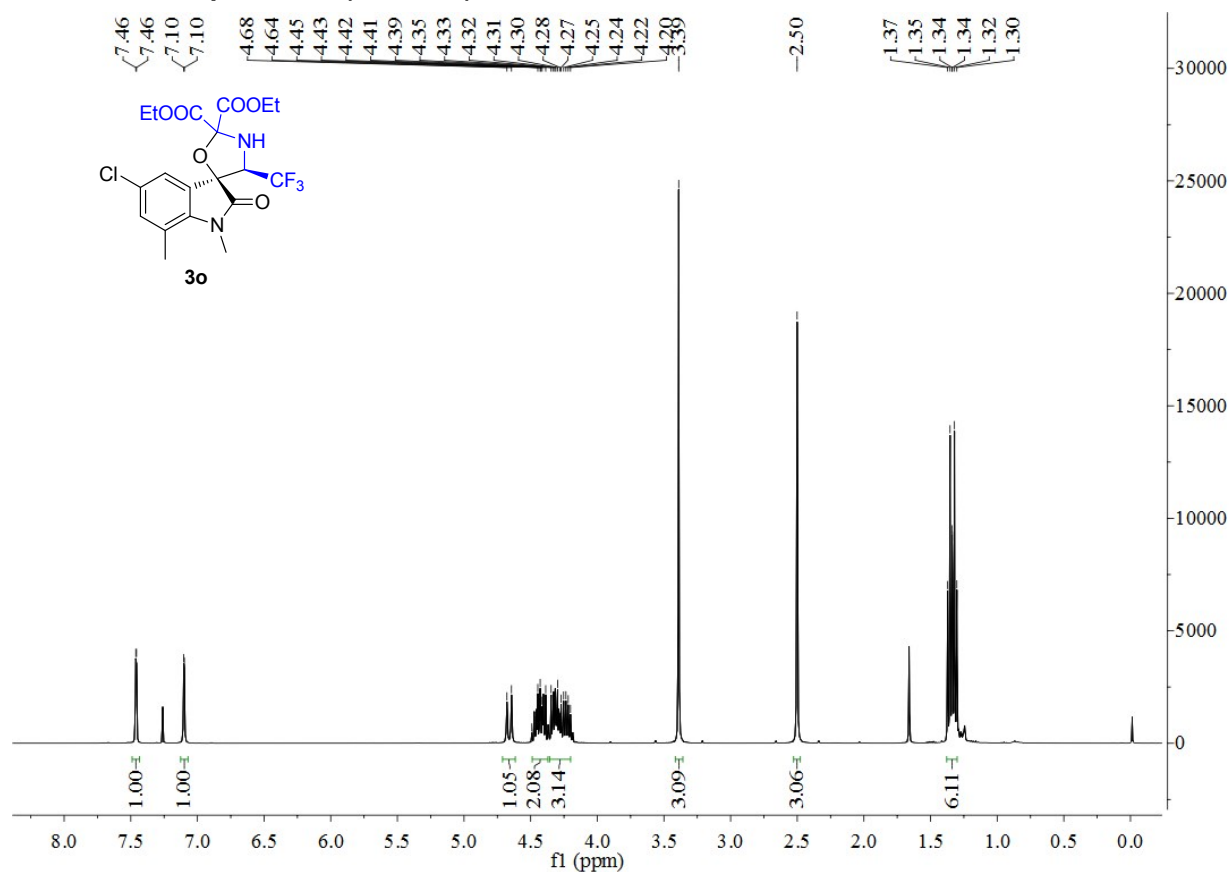

**<sup>13</sup>C NMR of compound 3o (in CDCl<sub>3</sub>)**

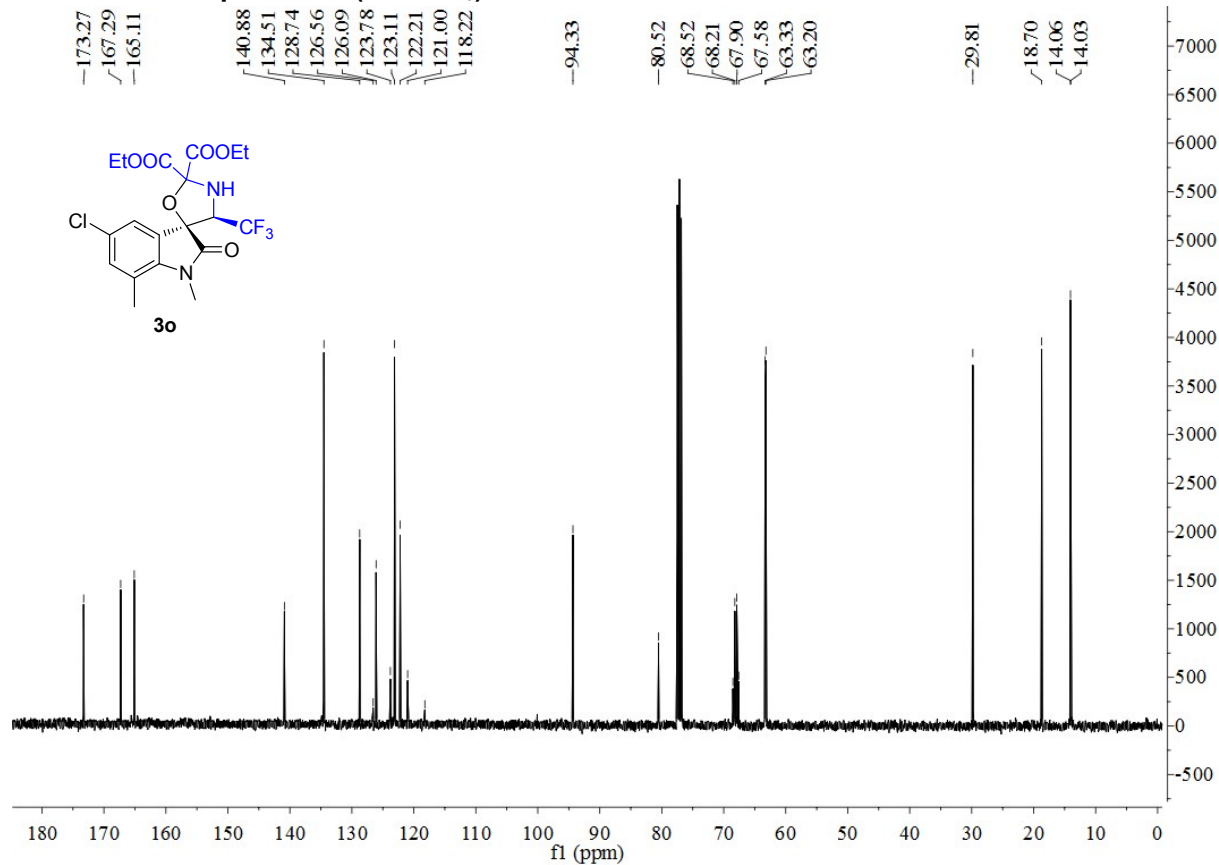

**$^{19}\text{F}$  NMR of compound 3o (in  $\text{CDCl}_3$ )**

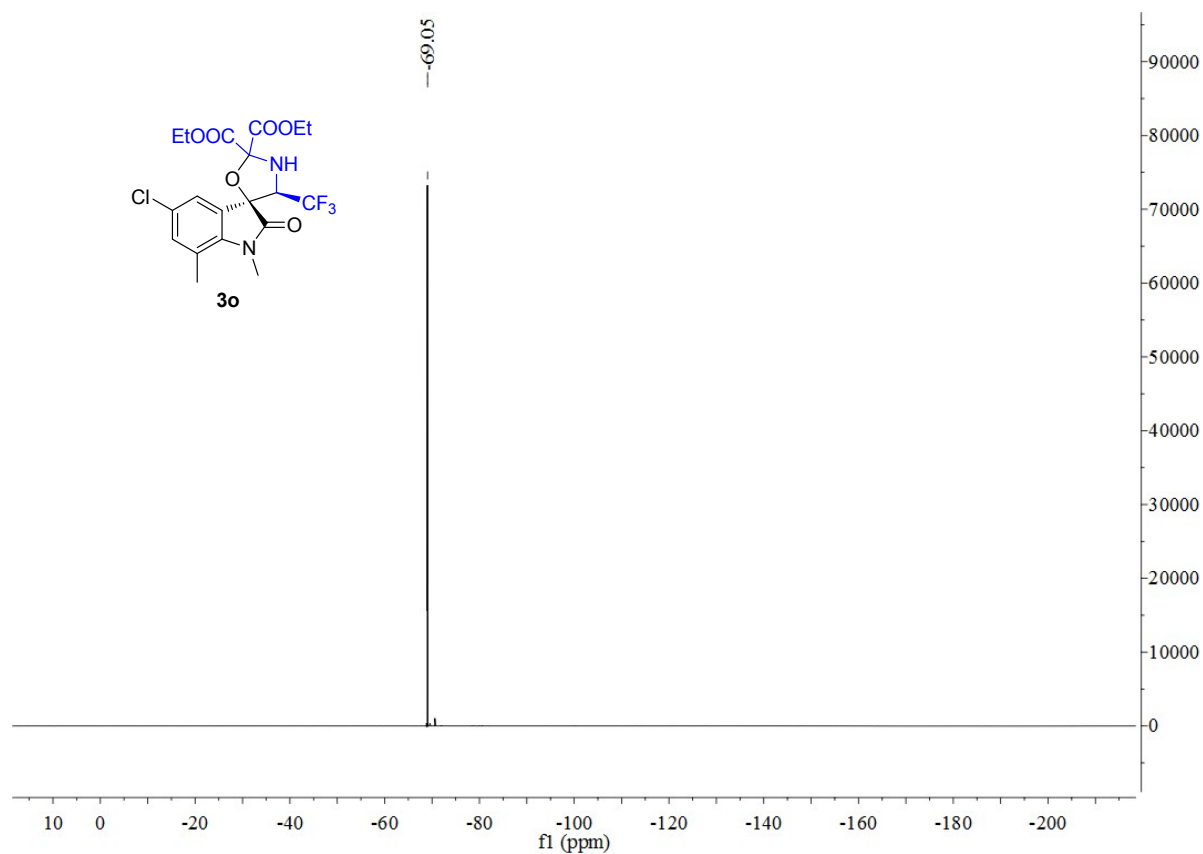

**$^1\text{H}$  NMR of compound 3p (in  $\text{CDCl}_3$ )**

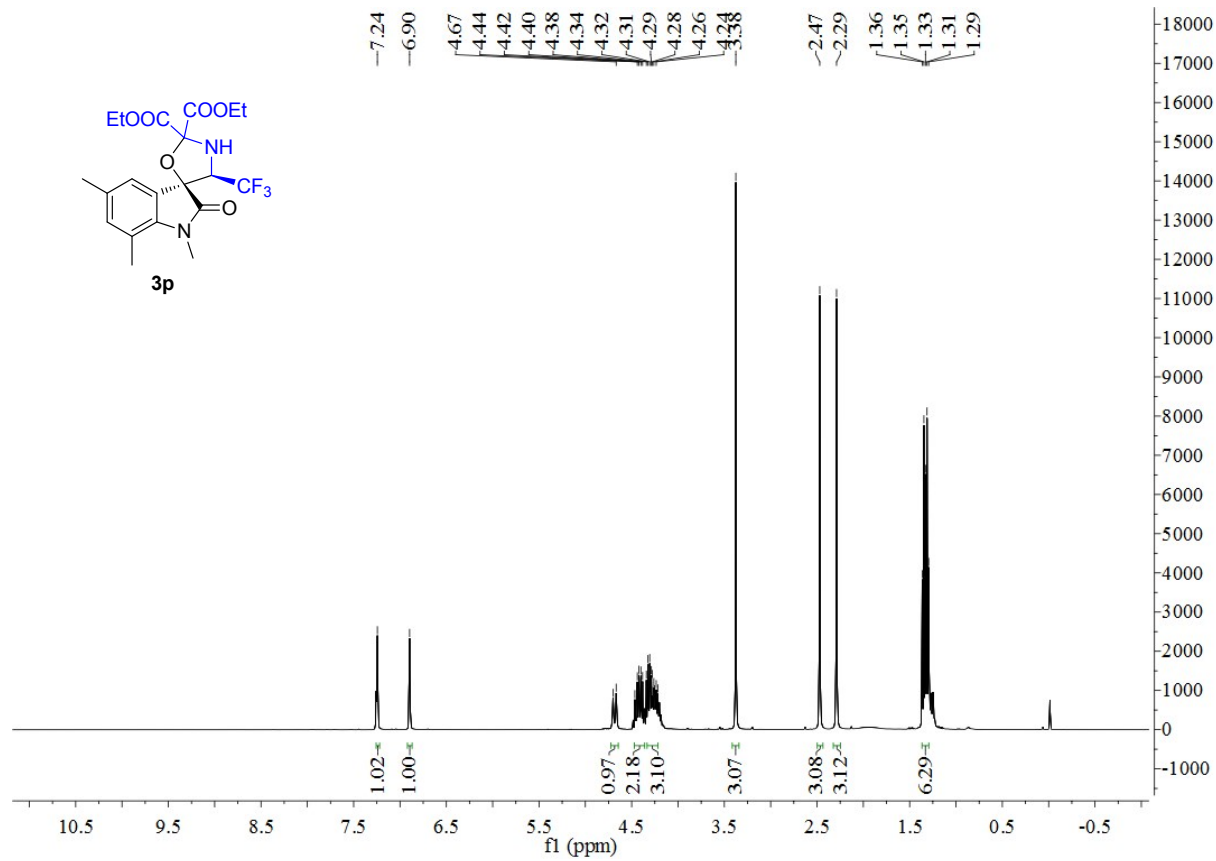

**<sup>13</sup>C NMR of compound 3p (in CDCl<sub>3</sub>)**

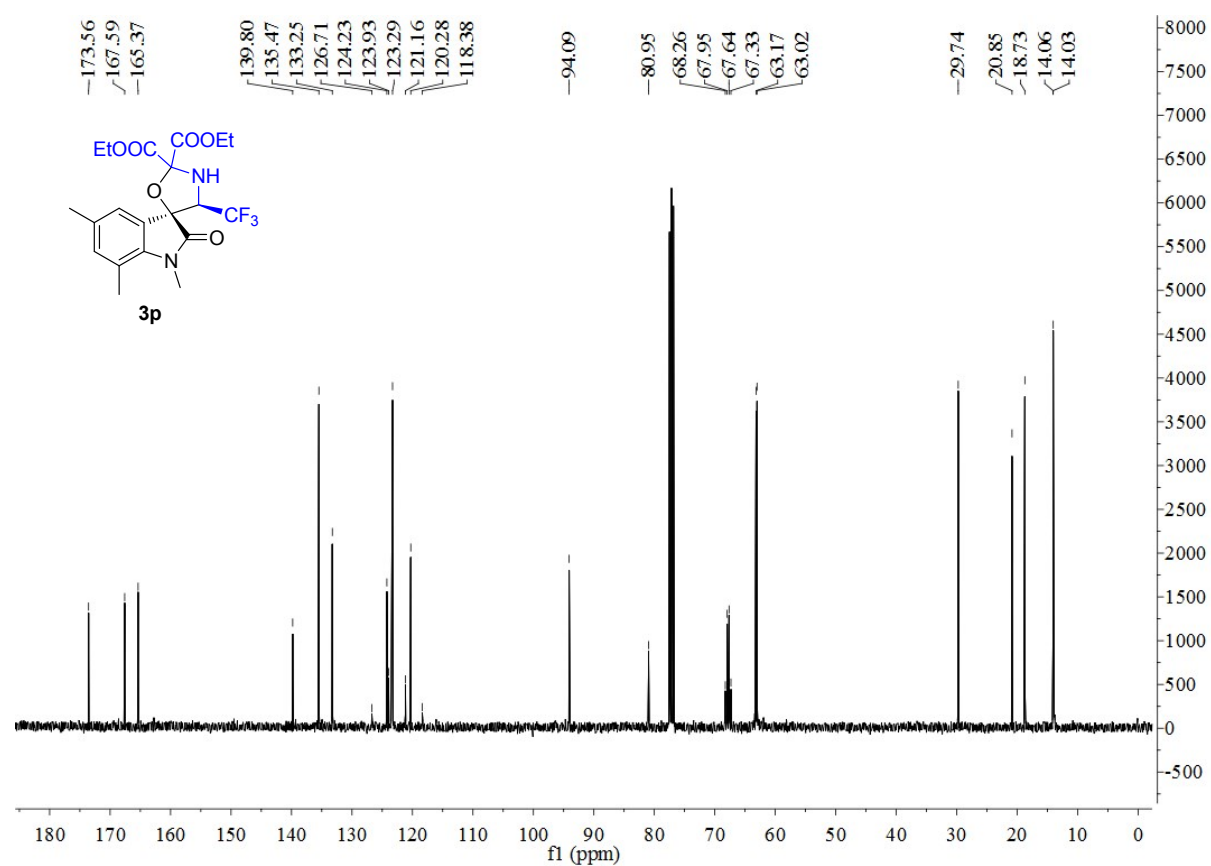

**<sup>19</sup>F NMR of compound 3p (in CDCl<sub>3</sub>)**

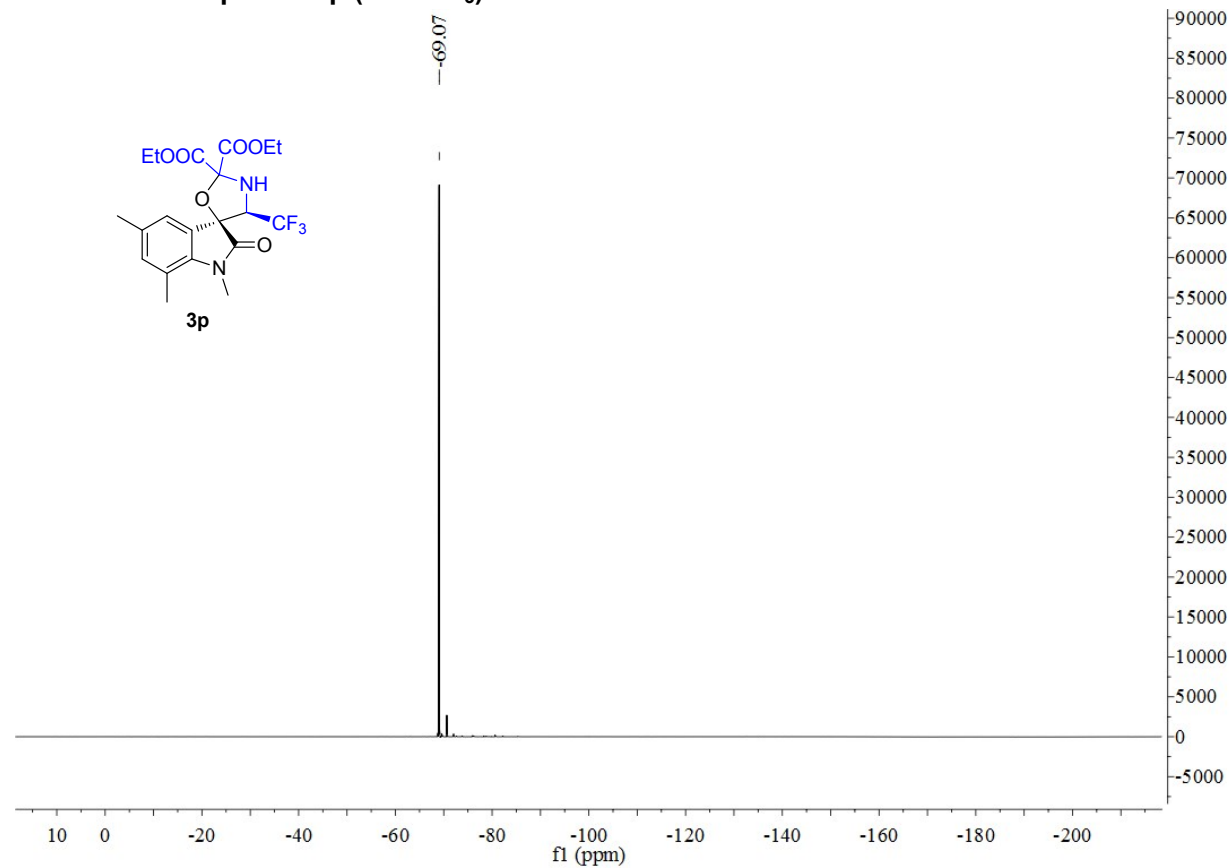



**<sup>1</sup>H NMR of compound 3q (in CDCl<sub>3</sub>)**

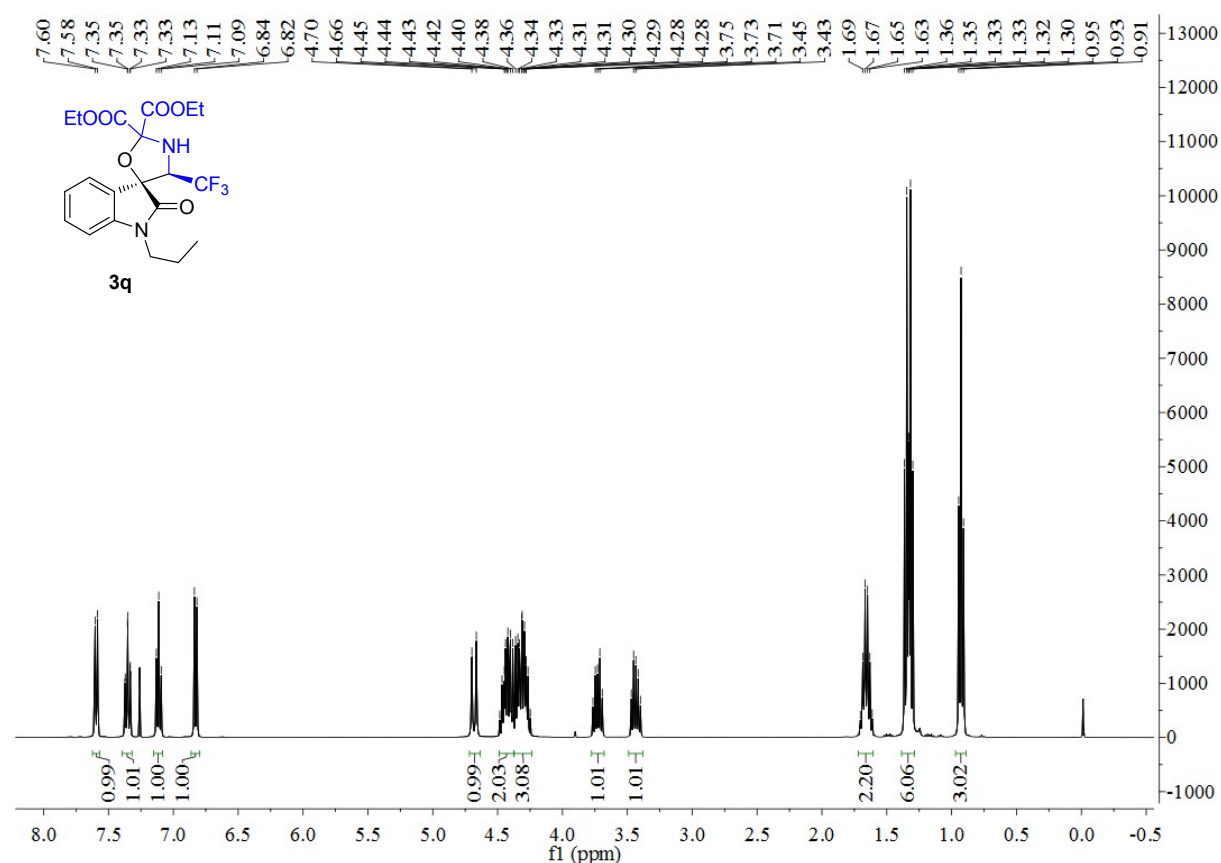

**<sup>13</sup>C NMR of compound 3q (in CDCl<sub>3</sub>)**

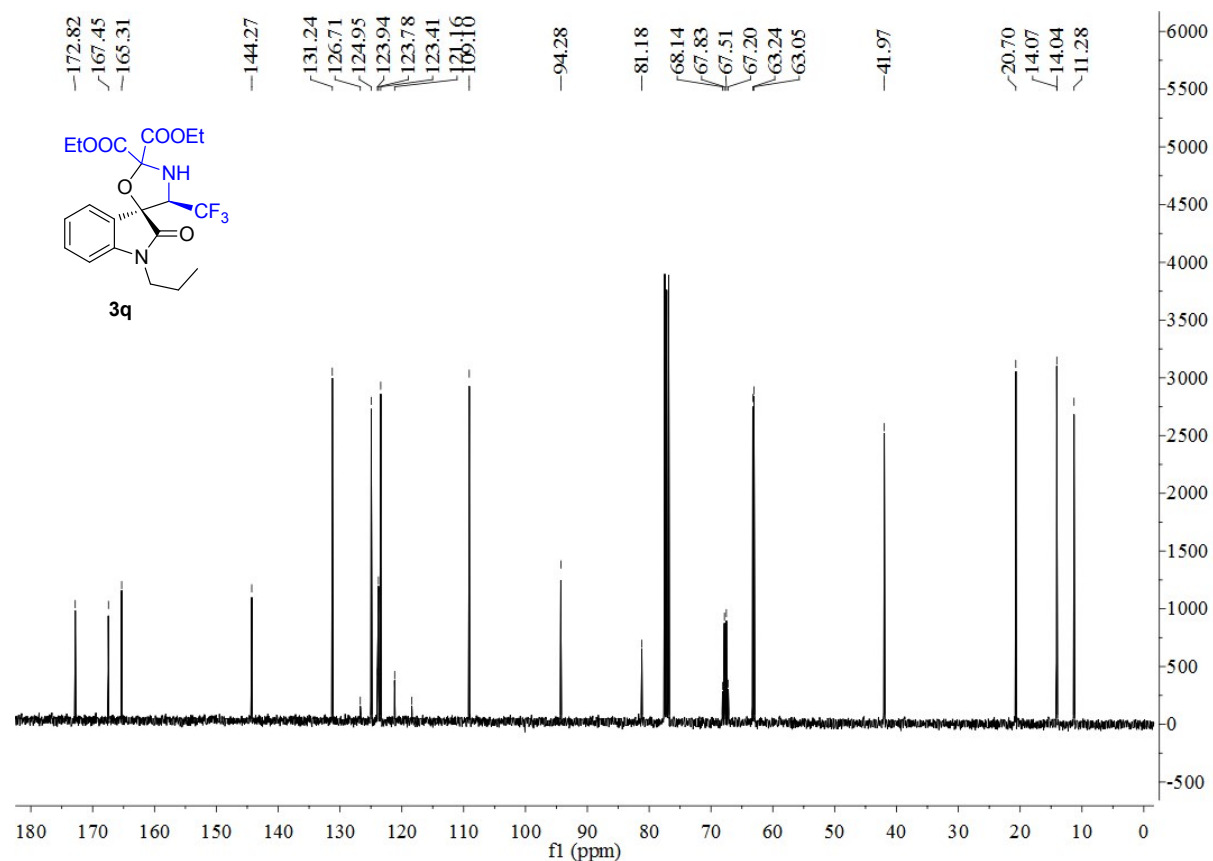

**$^{19}\text{F}$  NMR of compound 3q (in  $\text{CDCl}_3$ )**

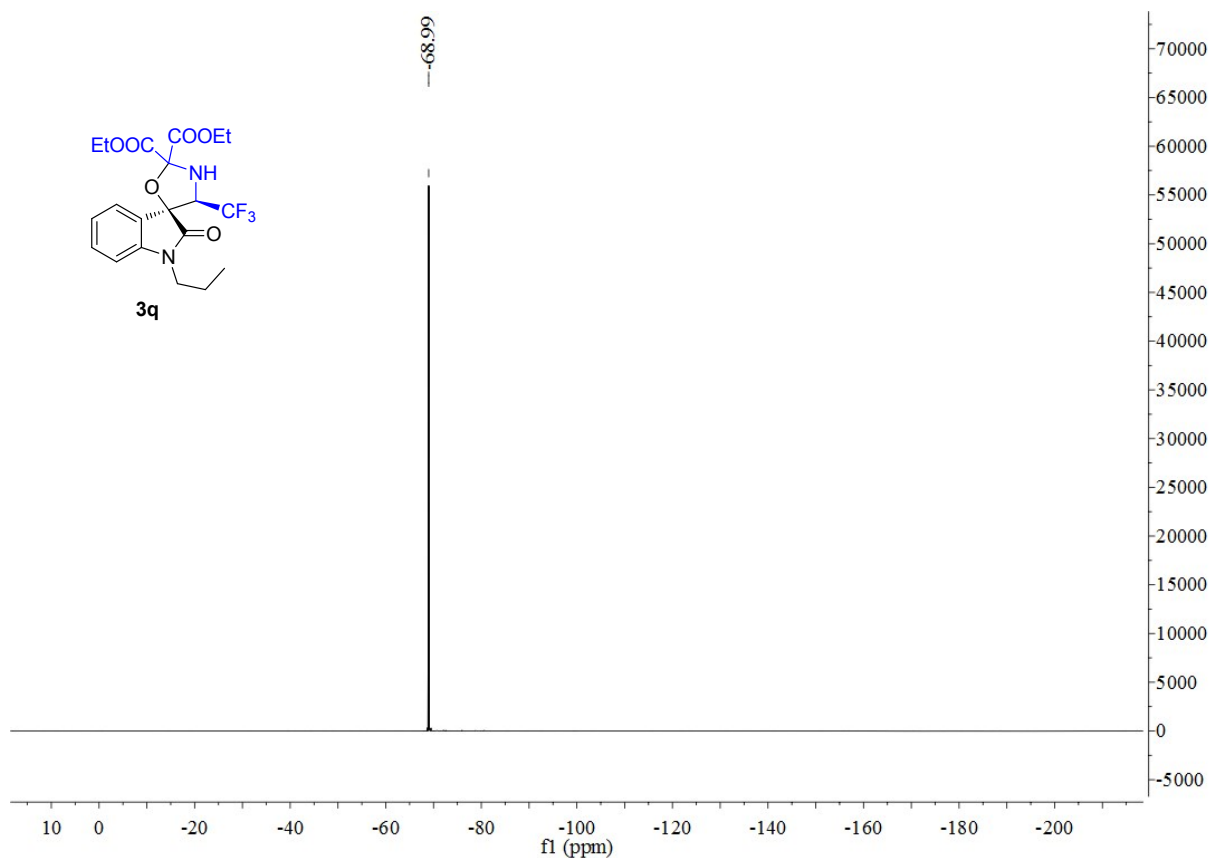

**$^1\text{H}$  NMR of compound 3r (in  $\text{CDCl}_3$ )**

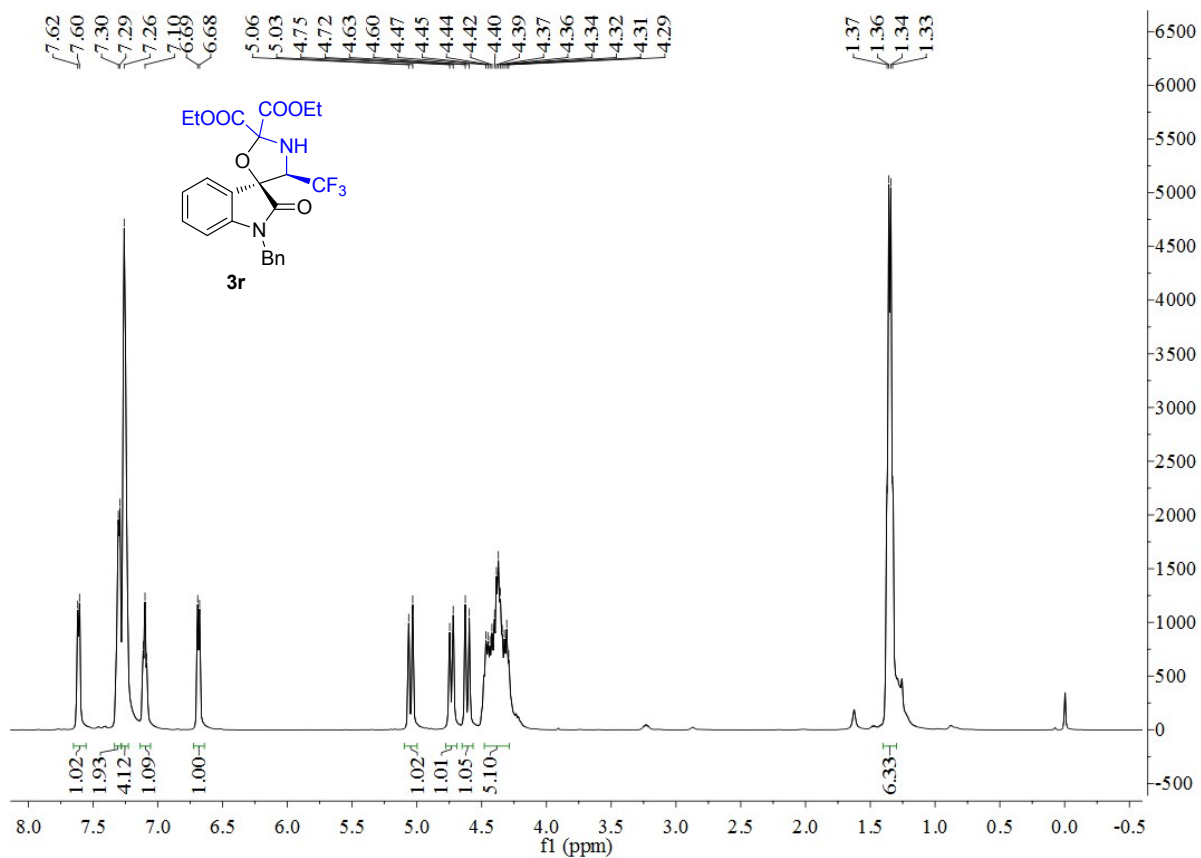

**$^{13}\text{C}$  NMR of compound 3r (in  $\text{CDCl}_3$ )**

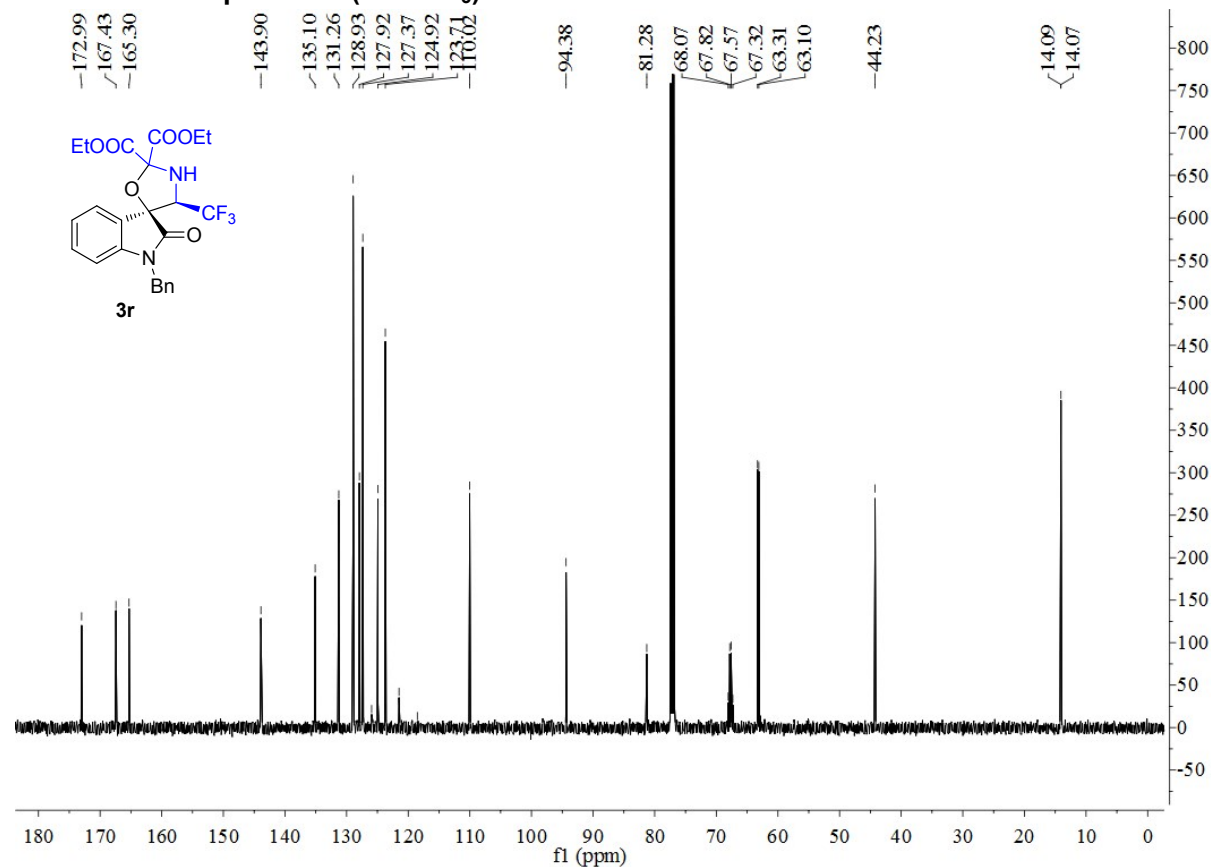

**$^{19}\text{F}$  NMR of compound 3r (in  $\text{CDCl}_3$ )**

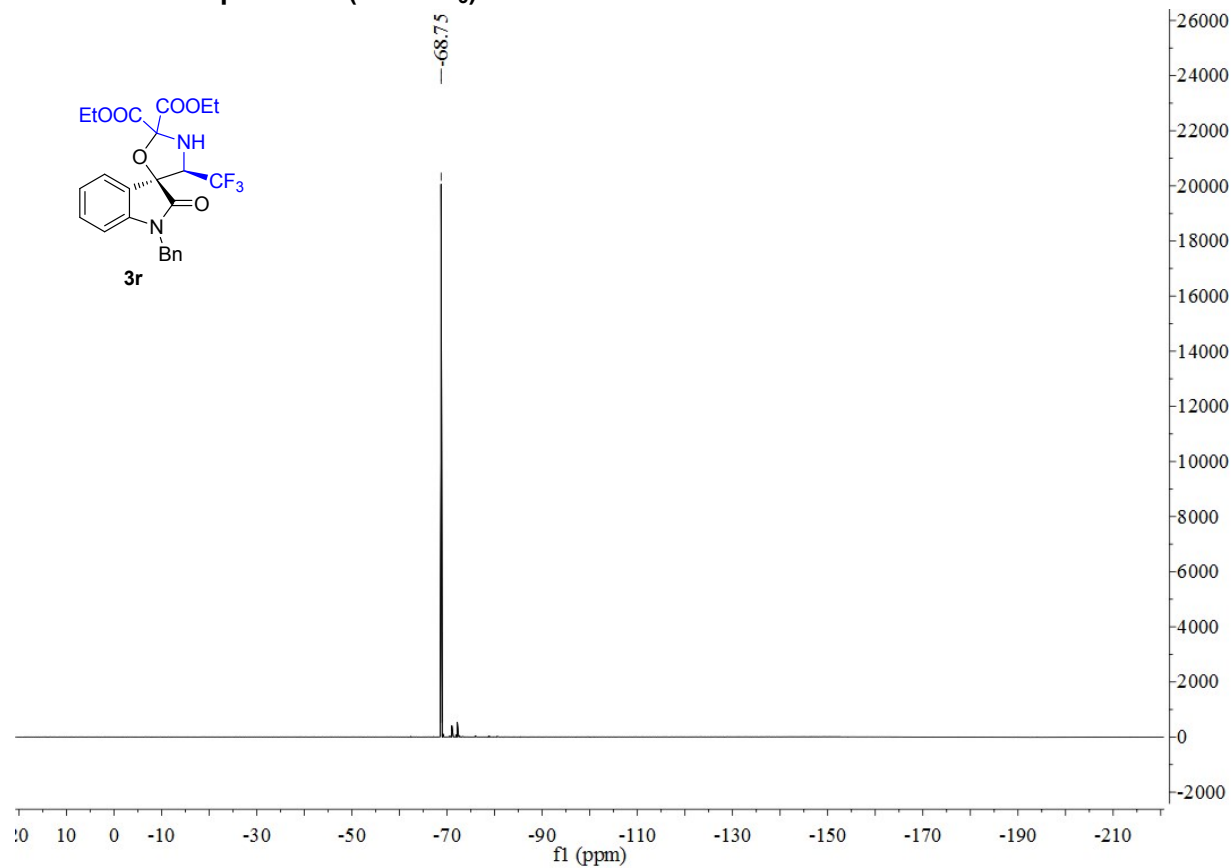

**<sup>1</sup>H NMR of compound 3s (in CDCl<sub>3</sub>)**

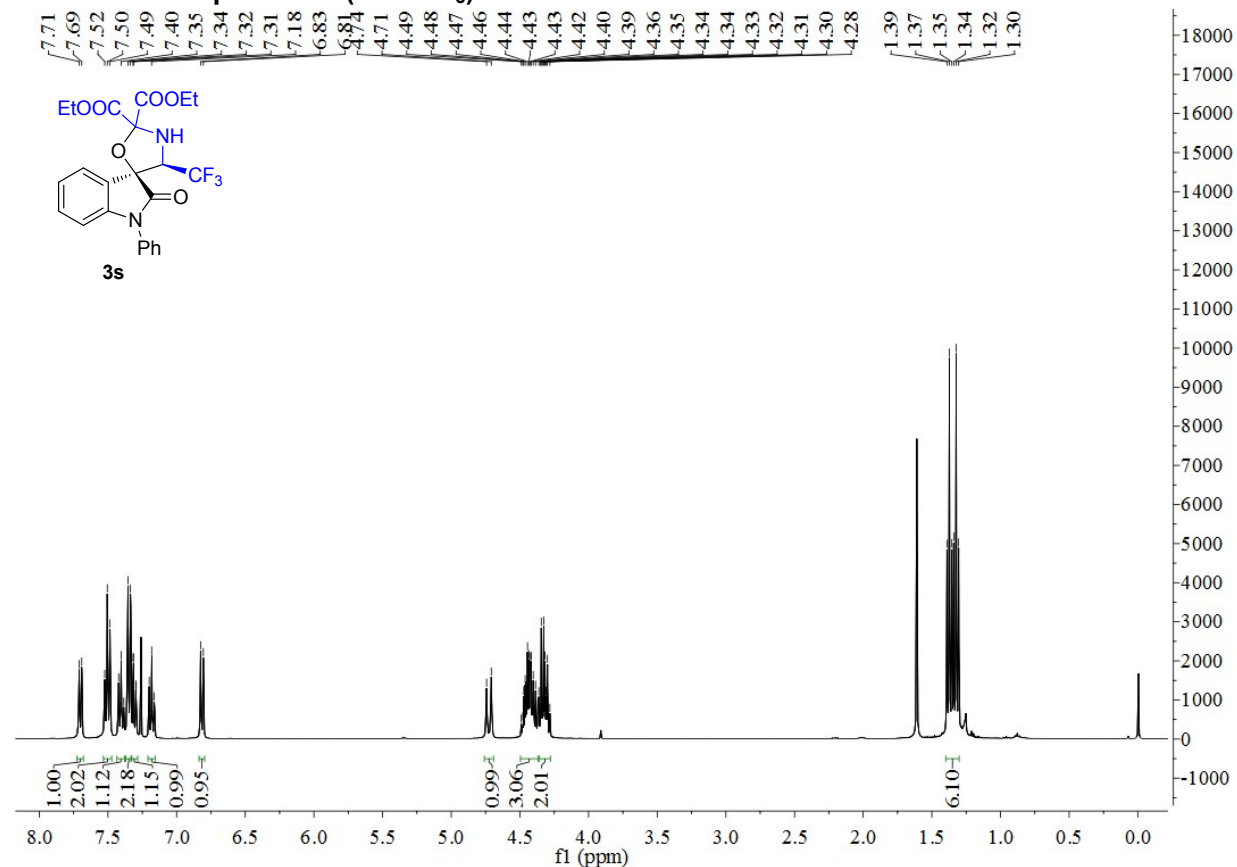

**<sup>13</sup>C NMR of compound 3s (in CDCl<sub>3</sub>)**

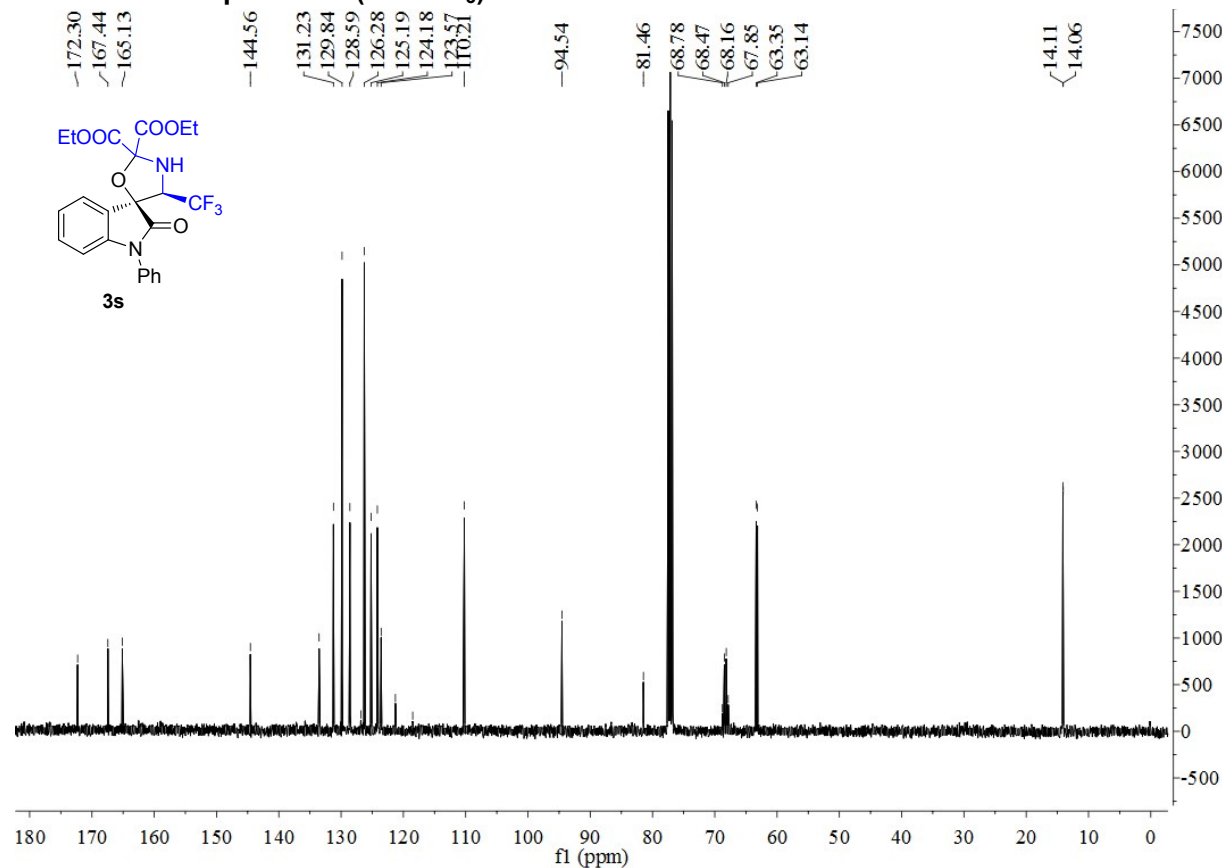

**<sup>19</sup>F NMR of compound 3s (in CDCl<sub>3</sub>)**

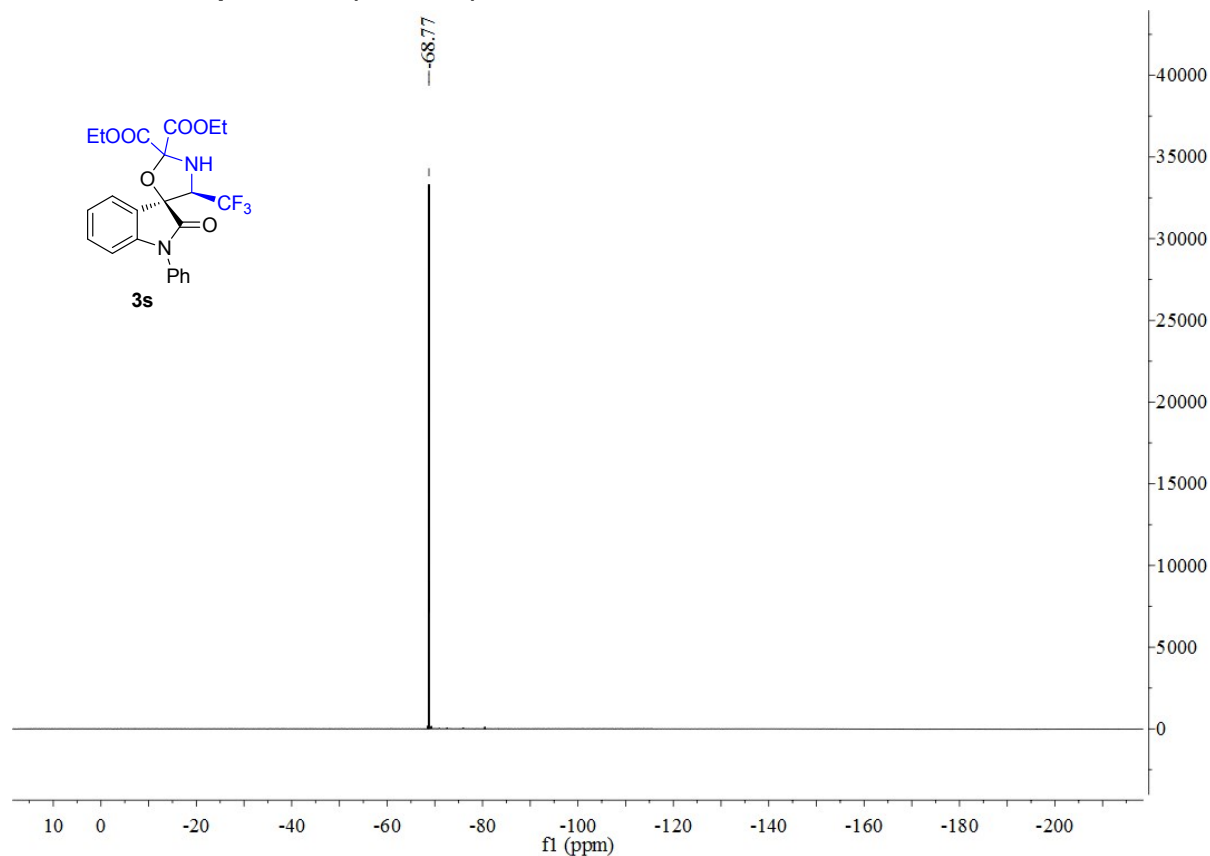

**<sup>1</sup>H NMR of compound 3t (in CDCl<sub>3</sub>)**

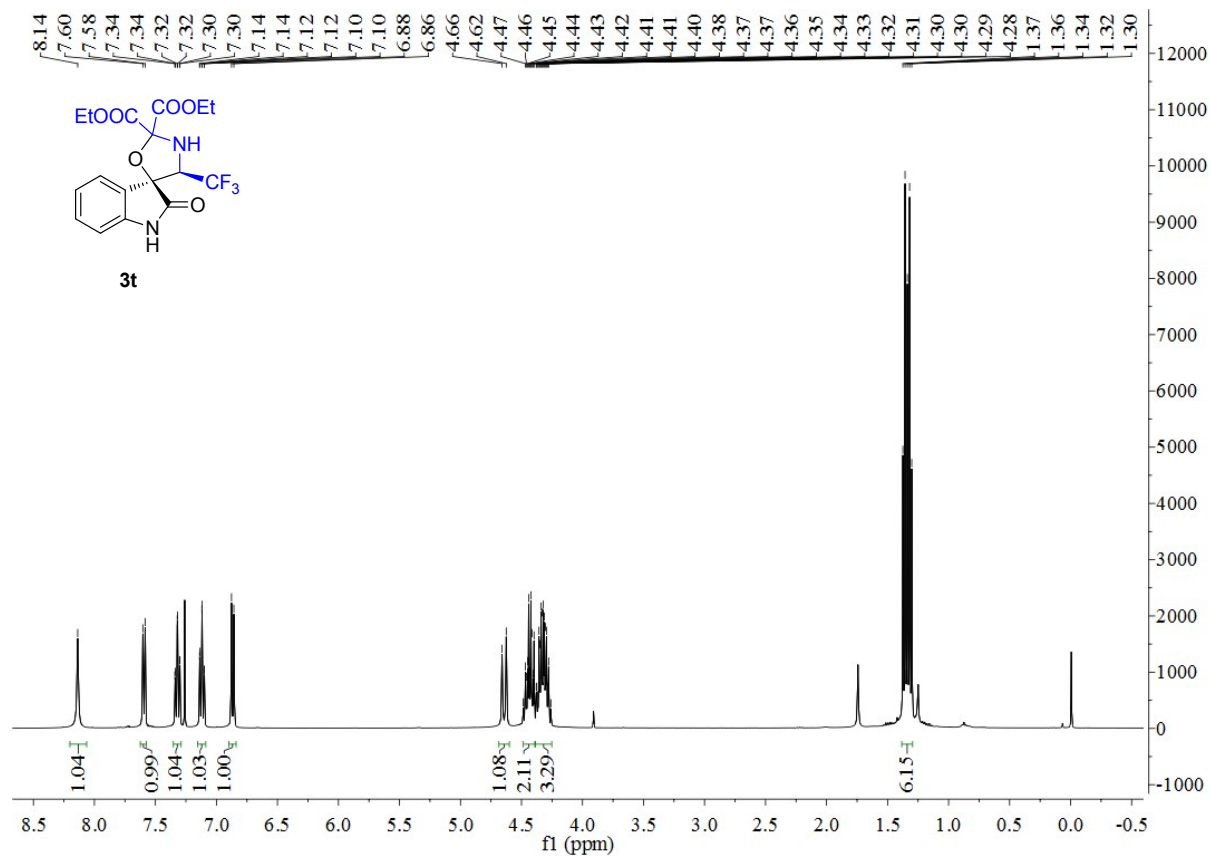

**$^{13}\text{C}$  NMR of compound 3t (in  $\text{CDCl}_3$ )**

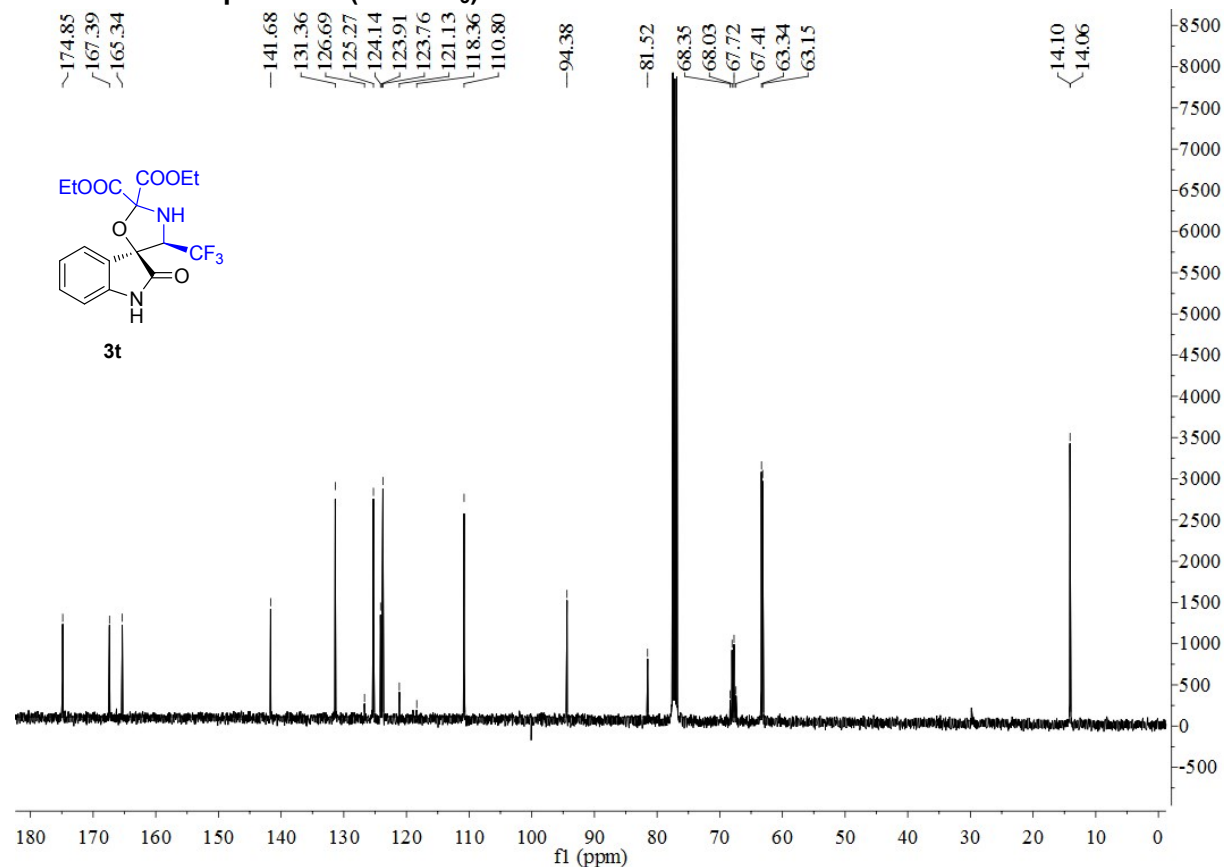

**$^{19}\text{F}$  NMR of compound 3t (in  $\text{CDCl}_3$ )**

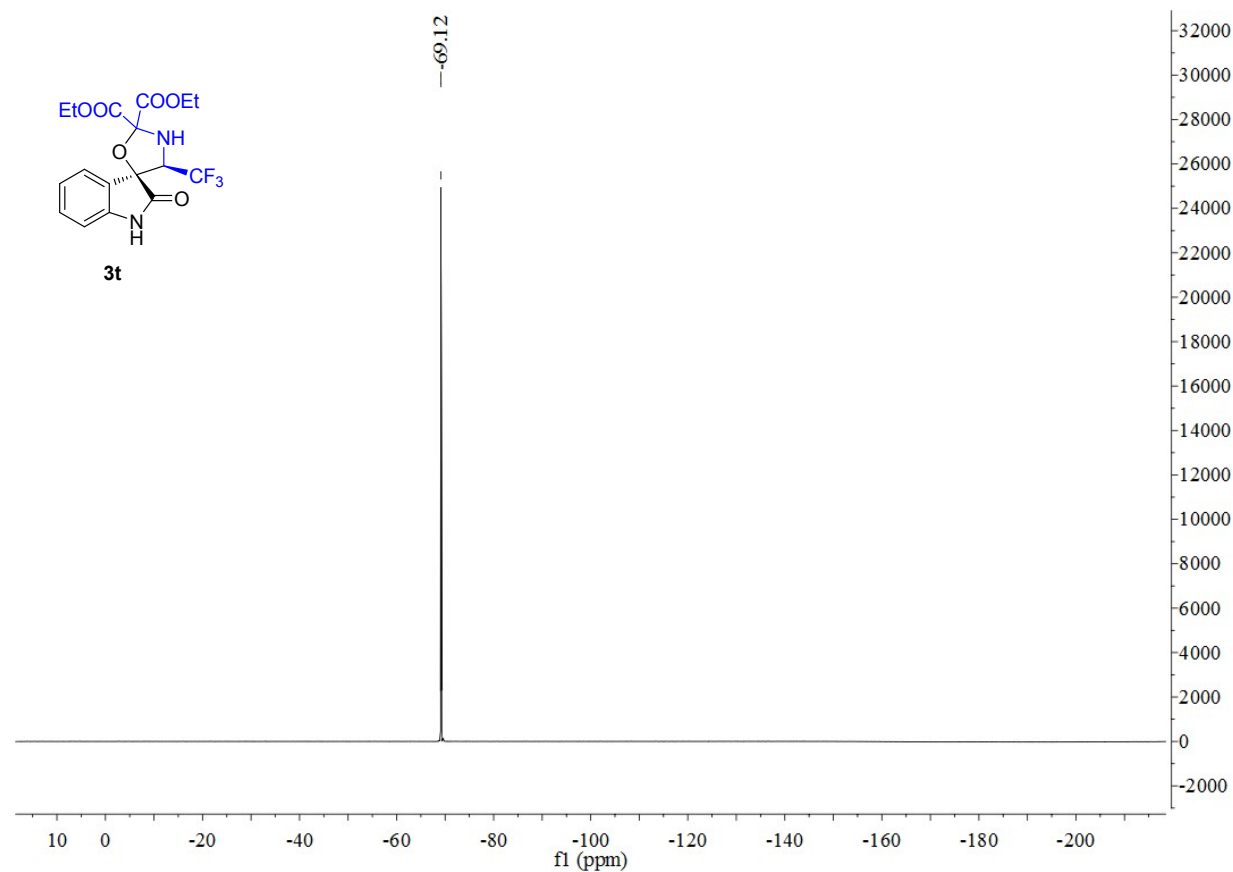

**<sup>1</sup>H NMR of compound 3aa (in CDCl<sub>3</sub>)**

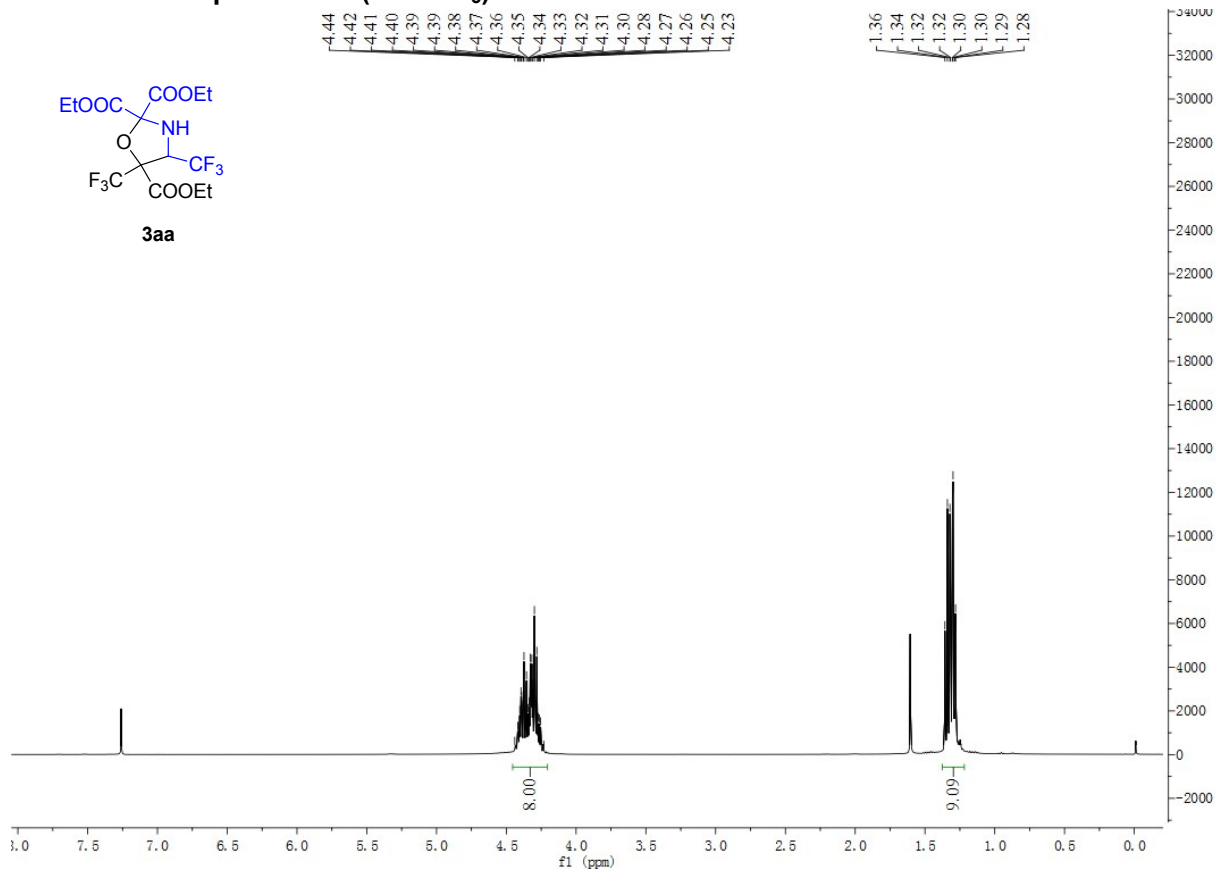

**<sup>13</sup>C NMR of compound 3aa (in CDCl<sub>3</sub>)**

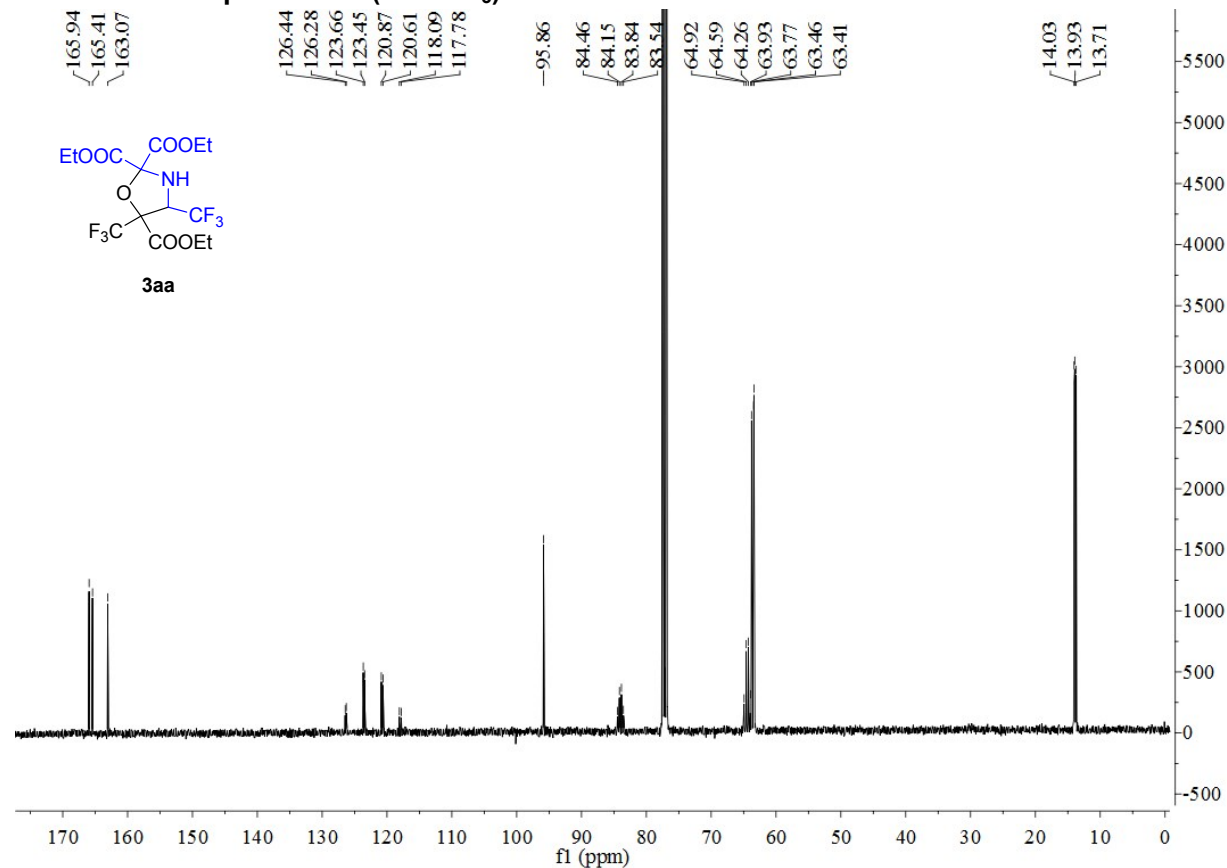

**$^{19}\text{F}$  NMR of compound 3aa (in  $\text{CDCl}_3$ )**

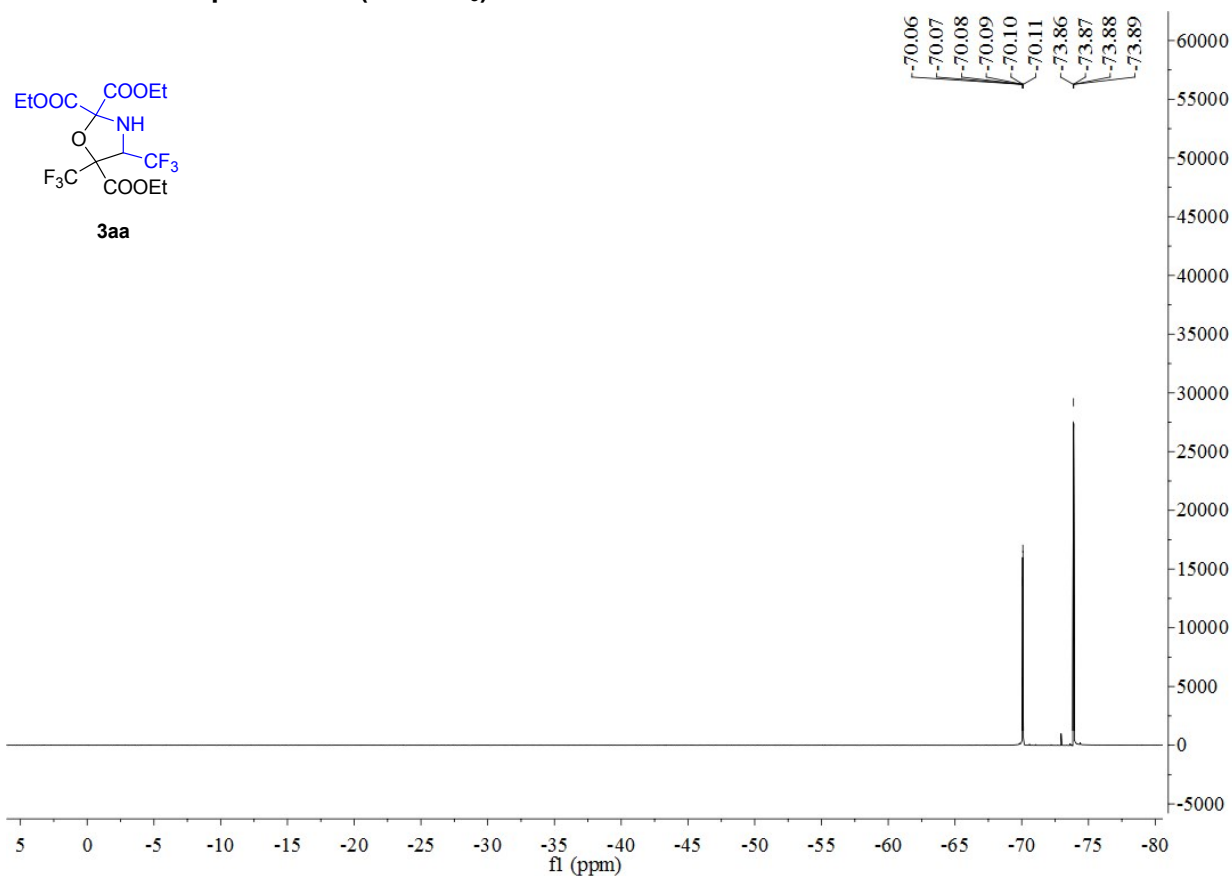

**$^1\text{H}$  NMR of compound 3u (in  $\text{CDCl}_3$ )**

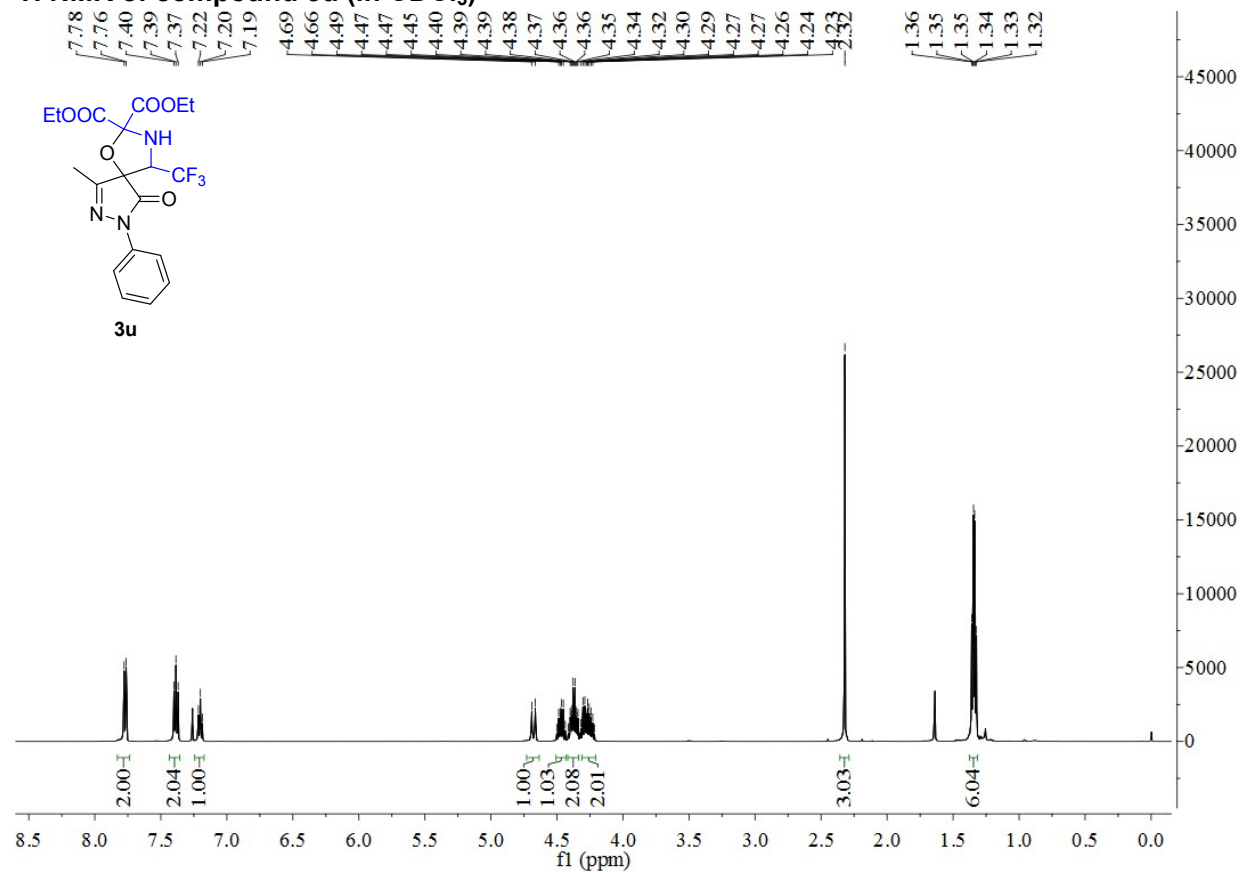



**<sup>13</sup>C NMR of compound 3u (in CDCl<sub>3</sub>)**

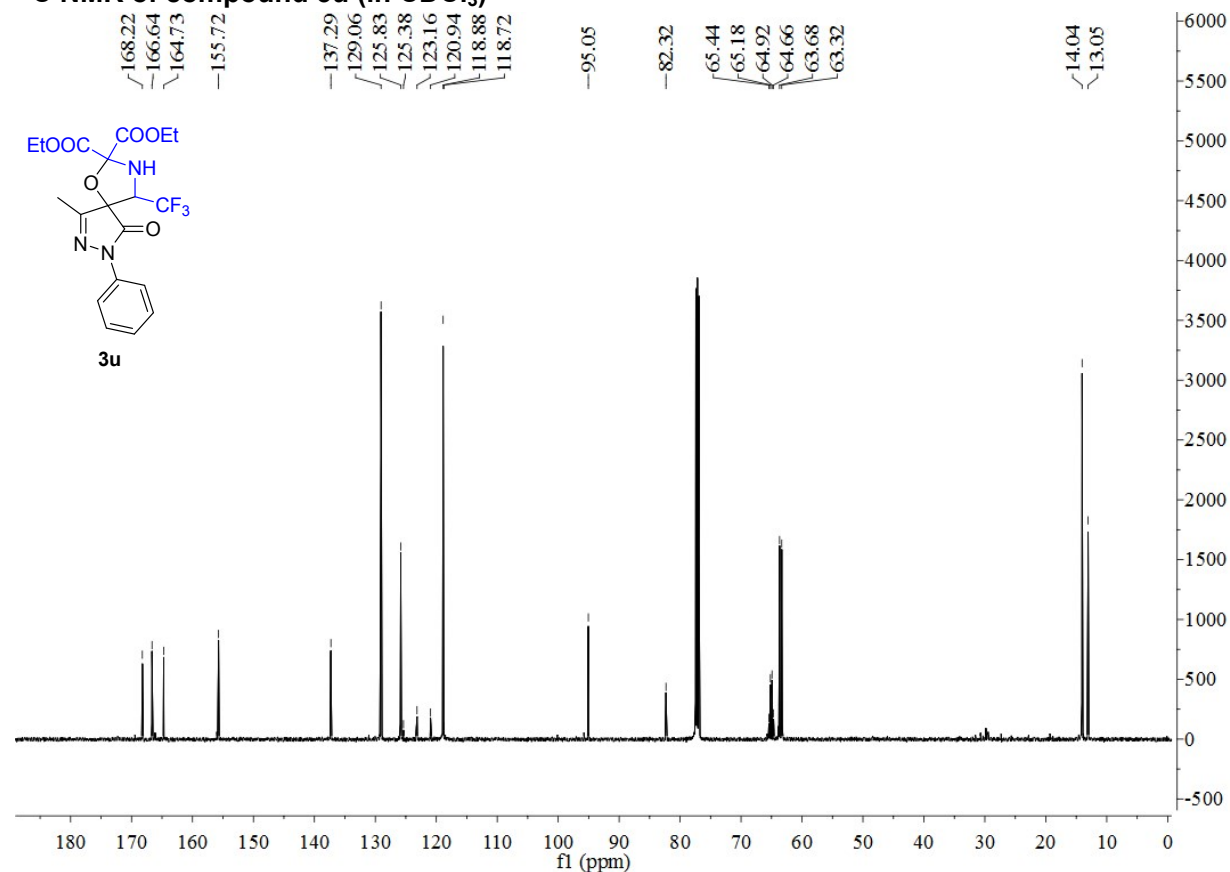

**<sup>19</sup>F NMR of compound 3u (in CDCl<sub>3</sub>)**

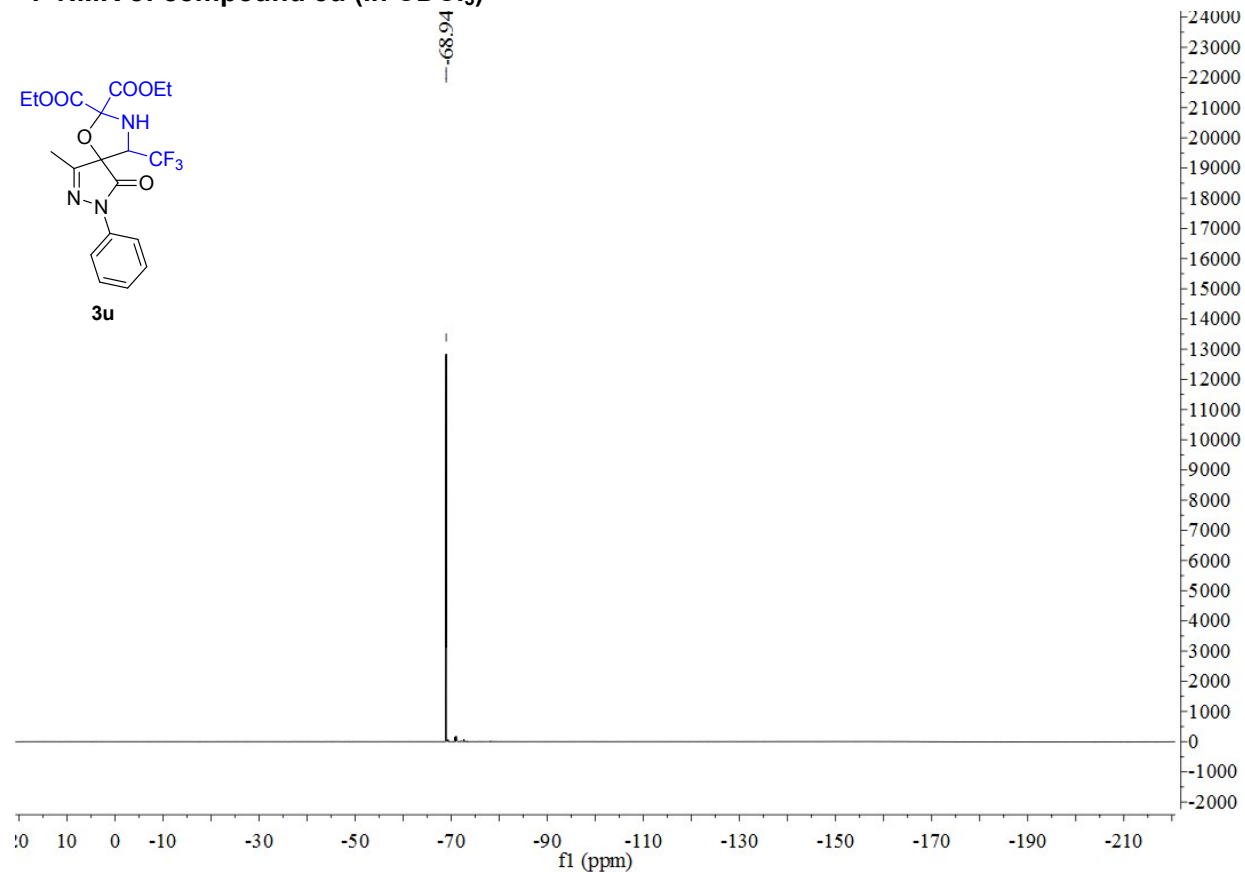

**<sup>1</sup>H NMR of compound 3v (in CDCl<sub>3</sub>)**

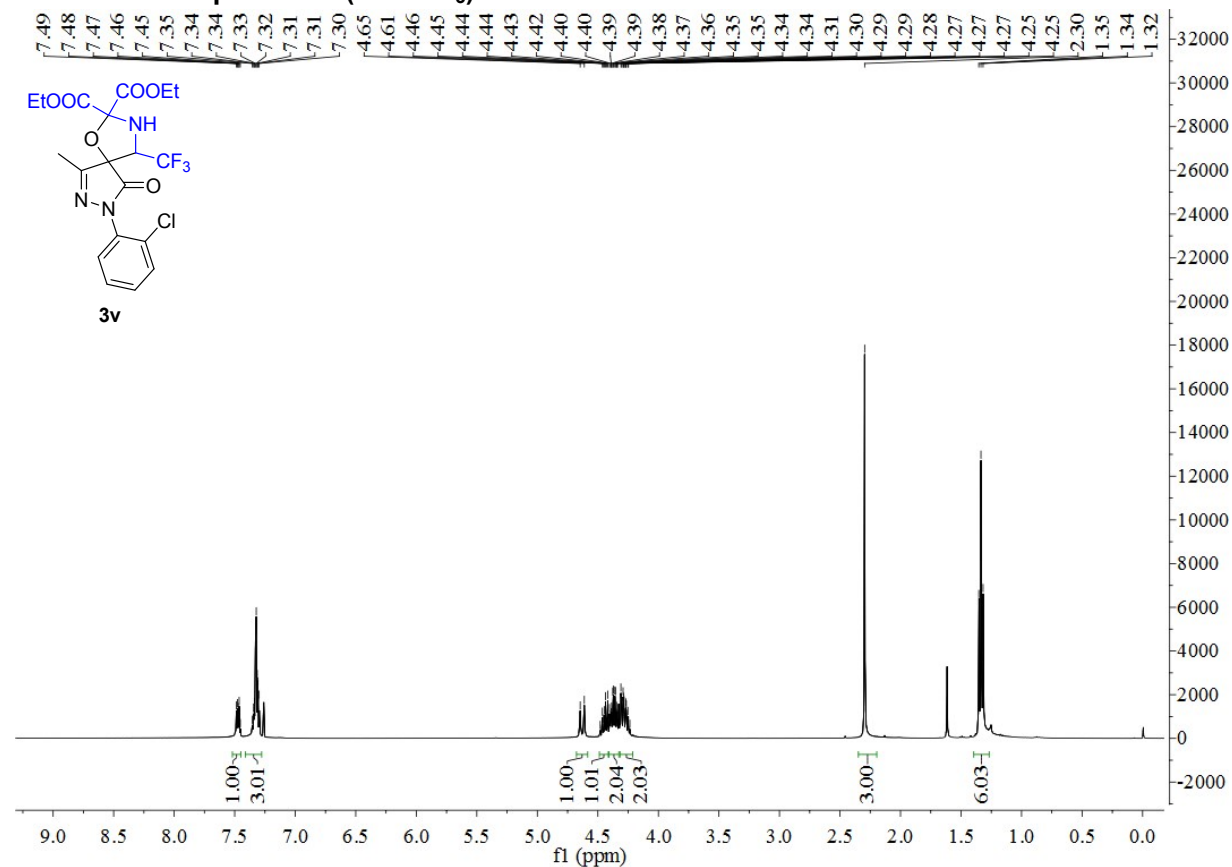

**<sup>13</sup>C NMR of compound 3v (in CDCl<sub>3</sub>)**

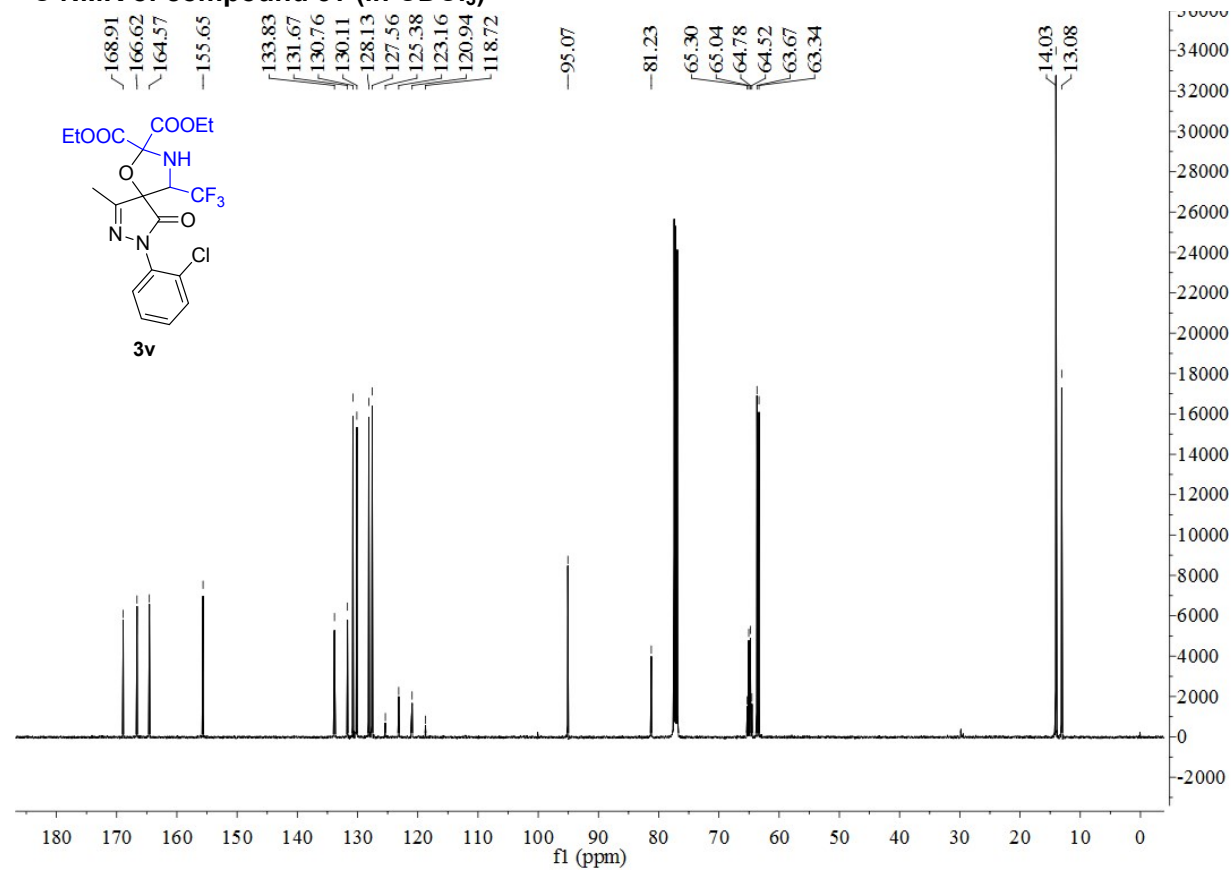

Chemical structure of **3v** is shown. The structure is a 2-chloro-1-(2,2,2-trifluoroethyl)-4,4-diethoxy-1H-imidazo[4,5-b]pyridine-3-carboxylate derivative. The chemical shift of the peak is  $\delta$  68.72 ppm.

**<sup>13</sup>C NMR of compound 3w (in CDCl<sub>3</sub>)**

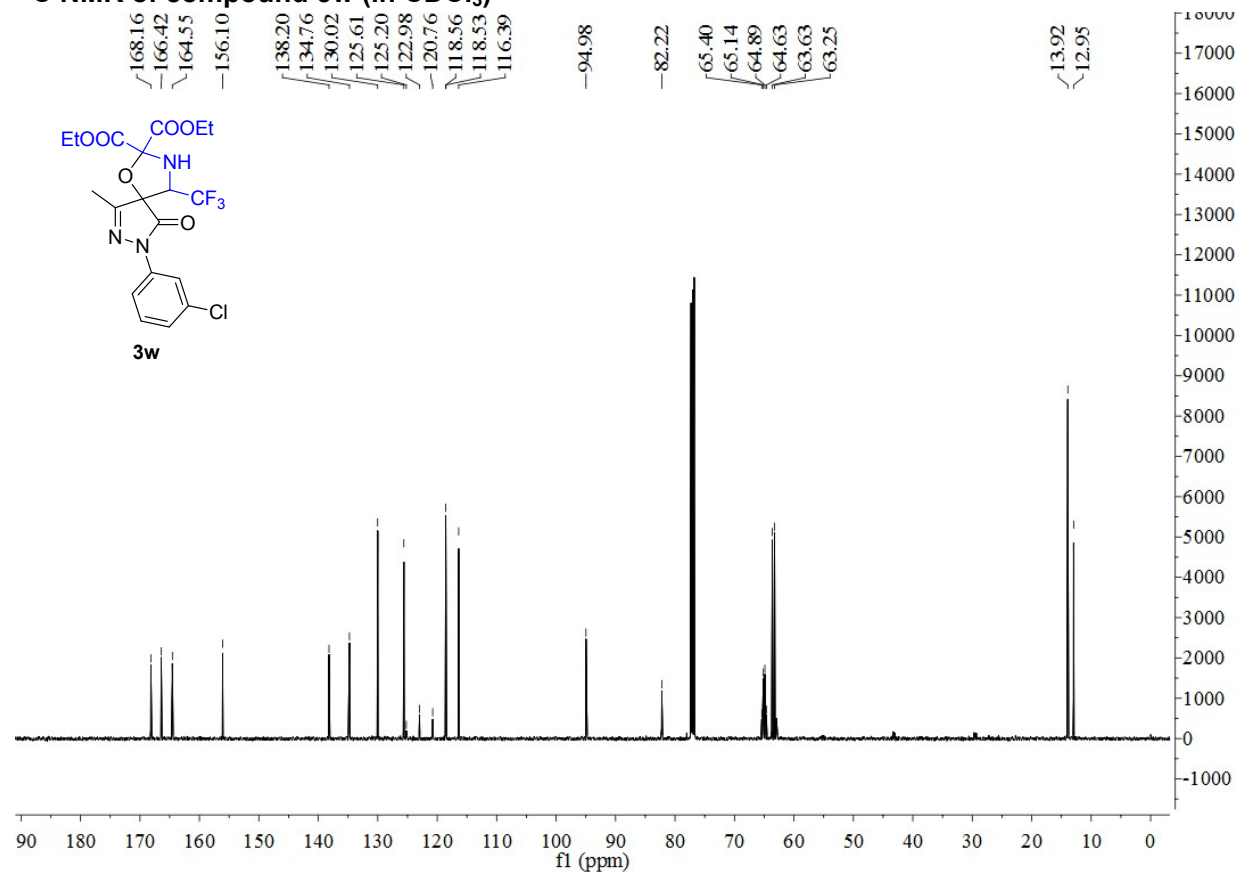

**<sup>19</sup>F NMR of compound 3w (in CDCl<sub>3</sub>)**

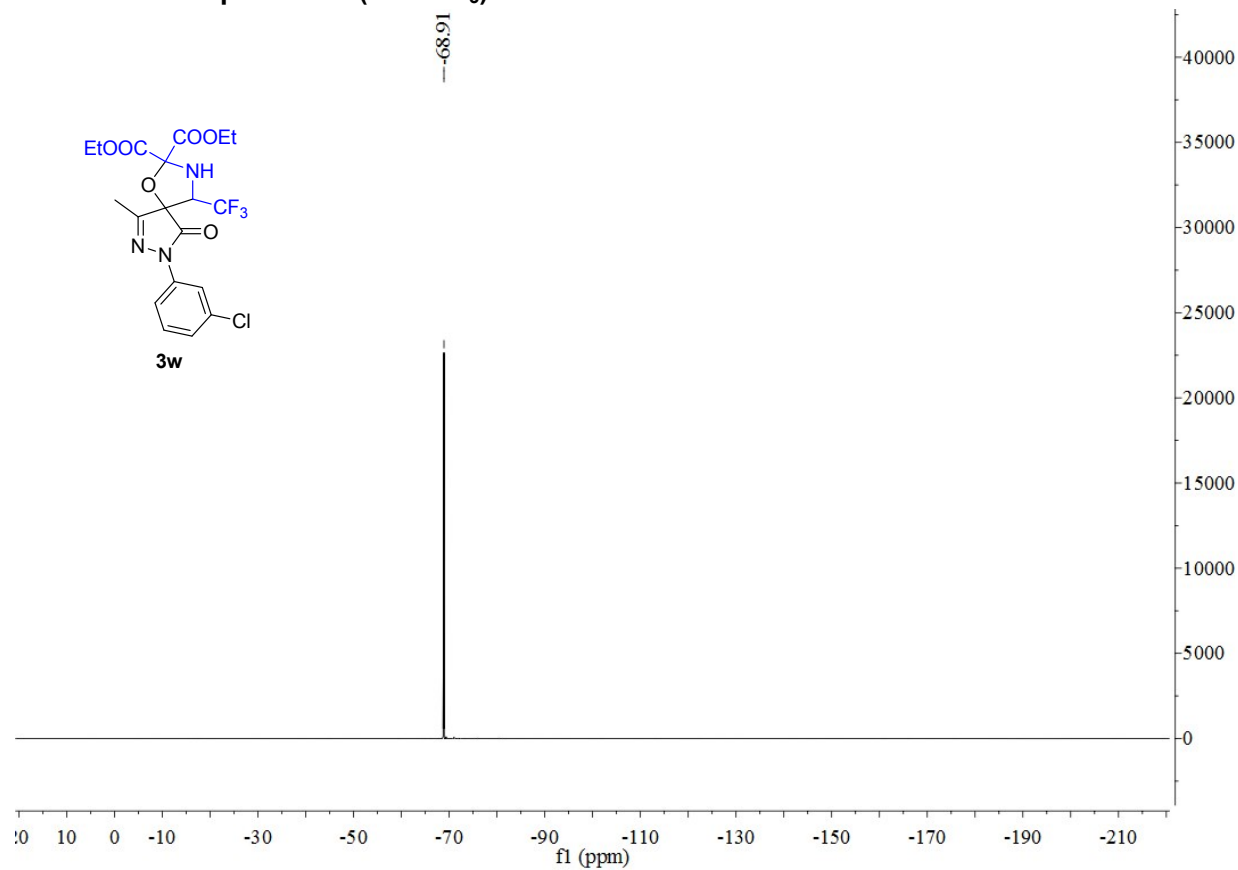

**<sup>1</sup>H NMR of compound 3x (in CDCl<sub>3</sub>)**

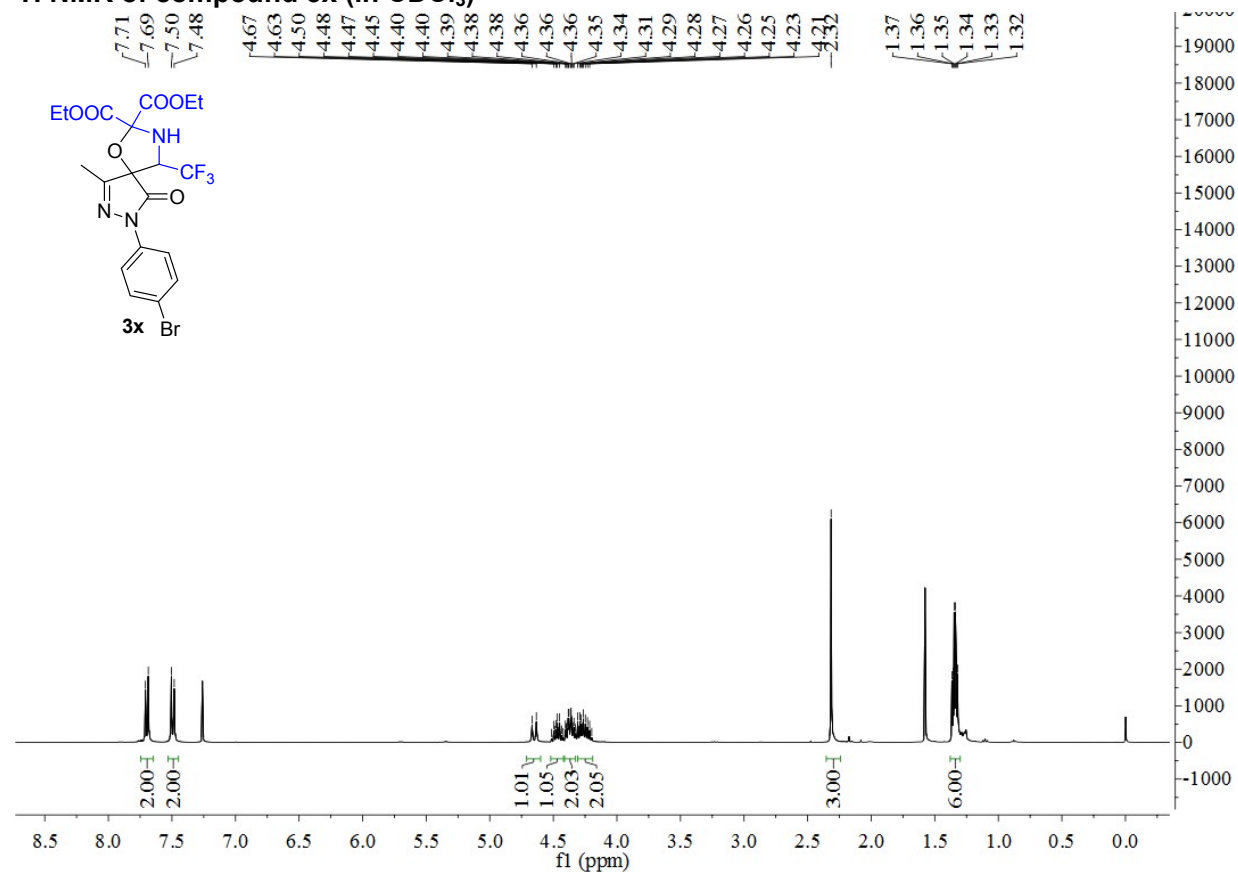

**<sup>13</sup>C NMR of compound 3x (in CDCl<sub>3</sub>)**

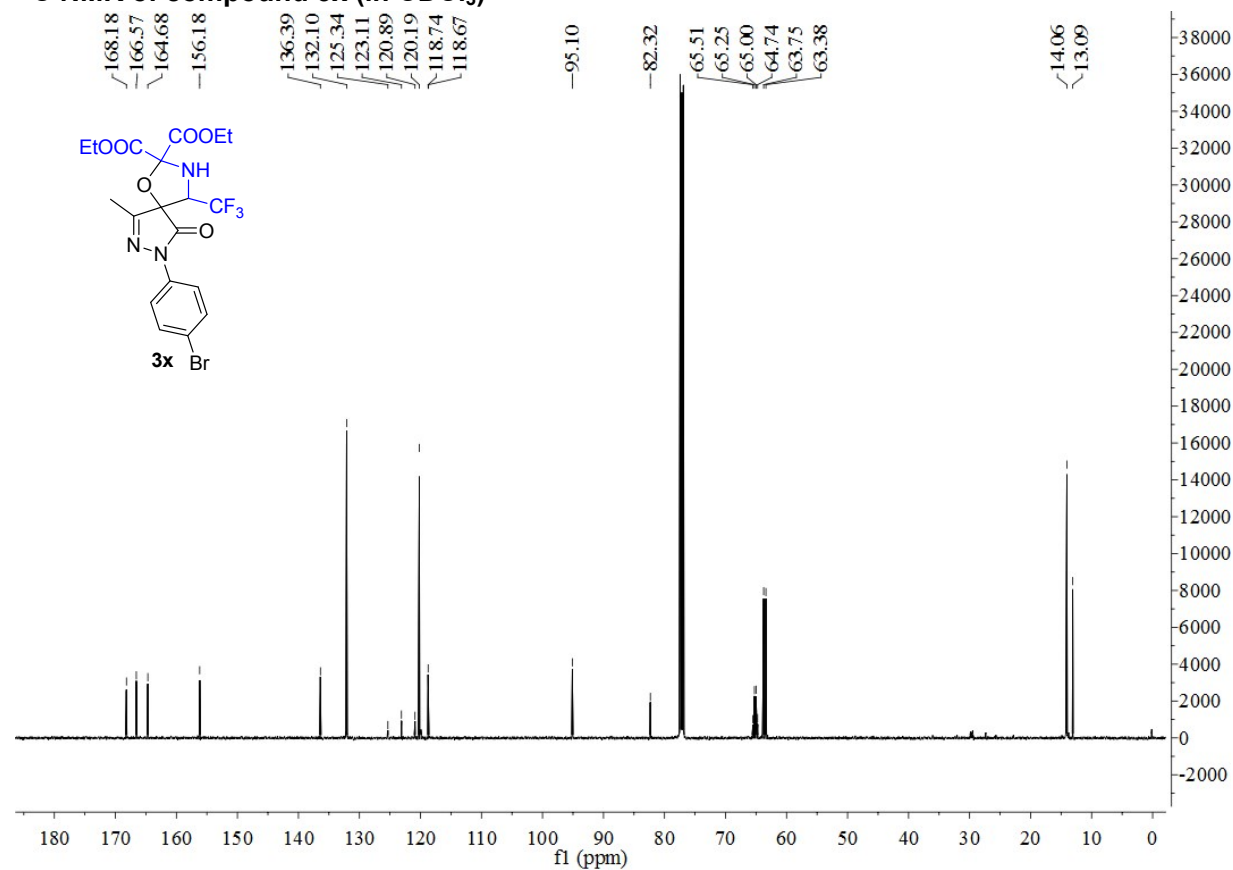

**$^{19}\text{F}$  NMR of compound 3x (in  $\text{CDCl}_3$ )**

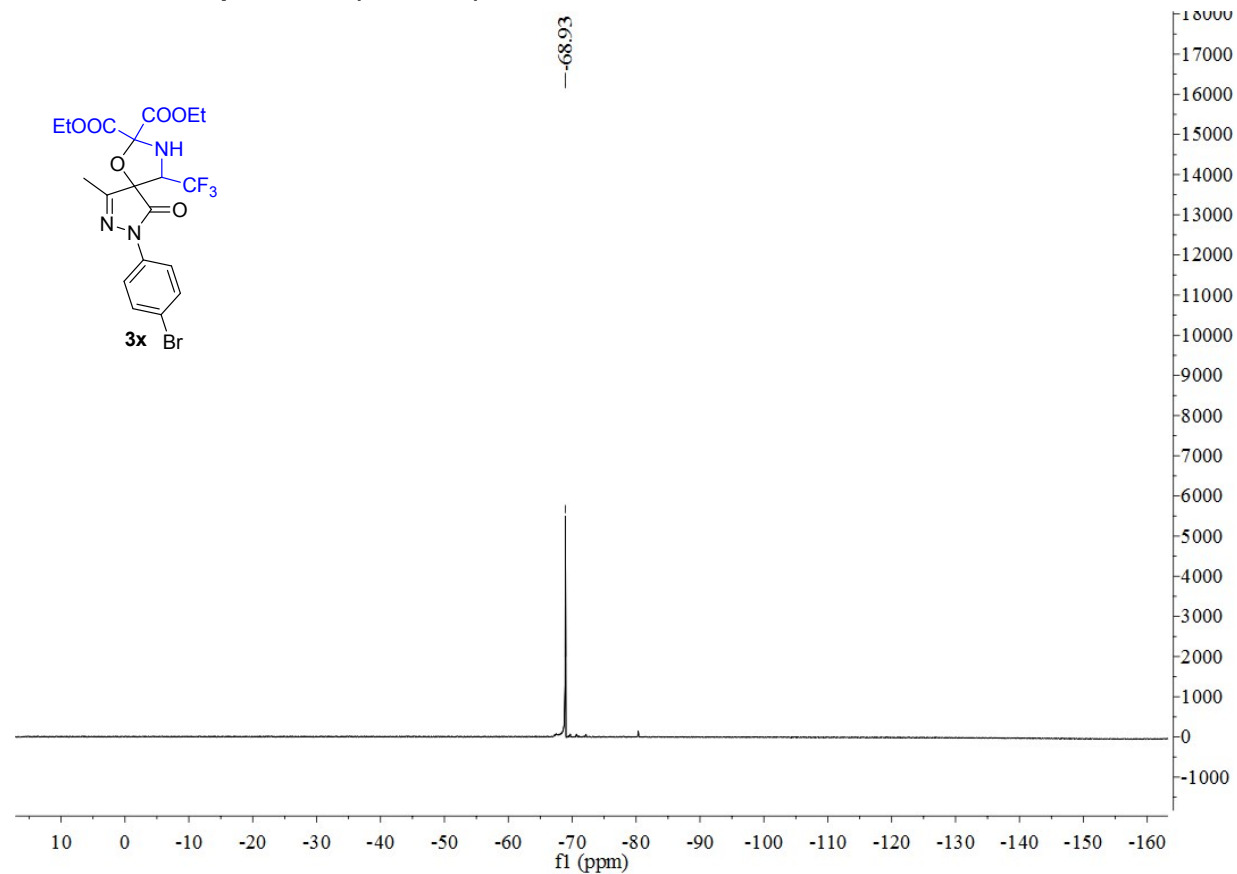

**$^1\text{H}$  NMR of compound 3y (in  $\text{CDCl}_3$ )**

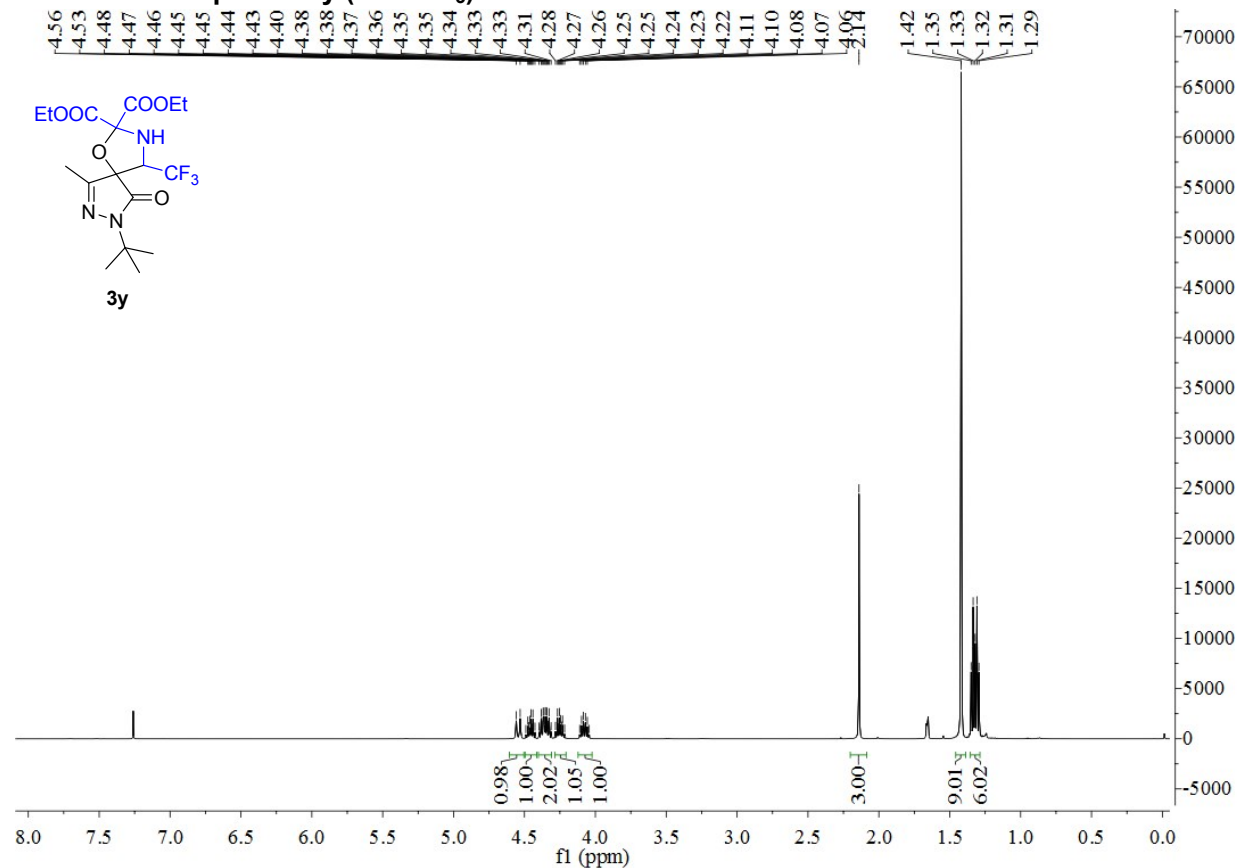

**<sup>13</sup>C NMR of compound 3y (in CDCl<sub>3</sub>)**

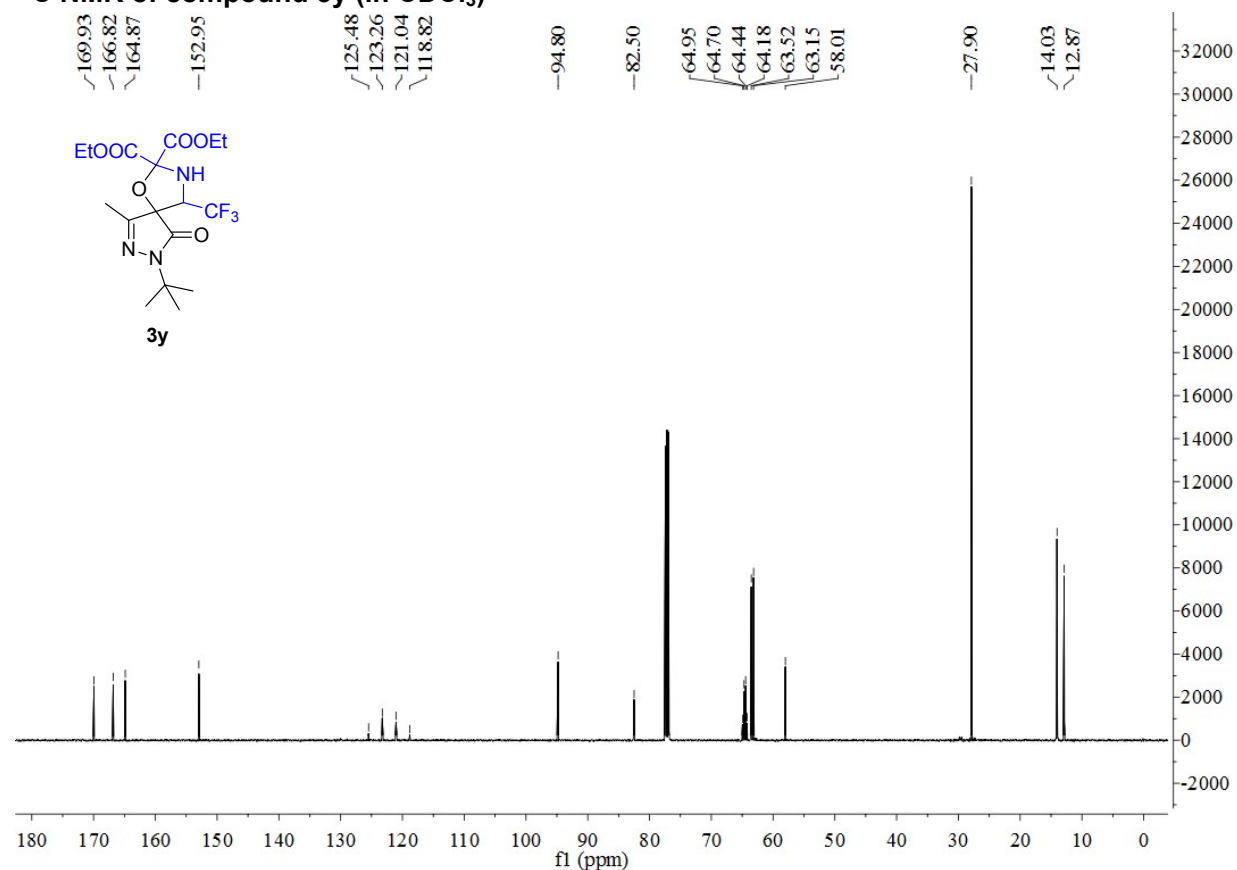

**<sup>19</sup>F NMR of compound 3y (in CDCl<sub>3</sub>)**

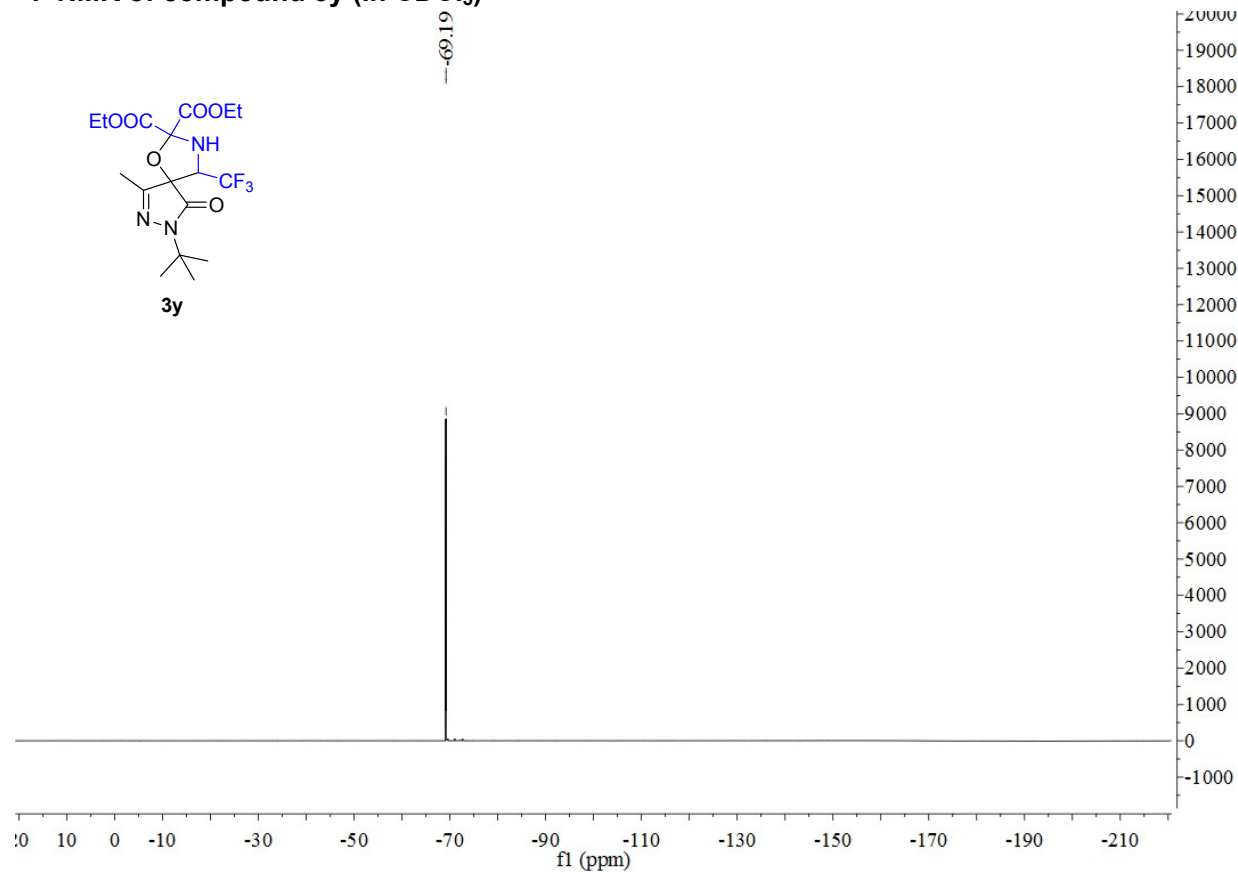

**<sup>1</sup>H NMR of compound 3z (in CDCl<sub>3</sub>)**

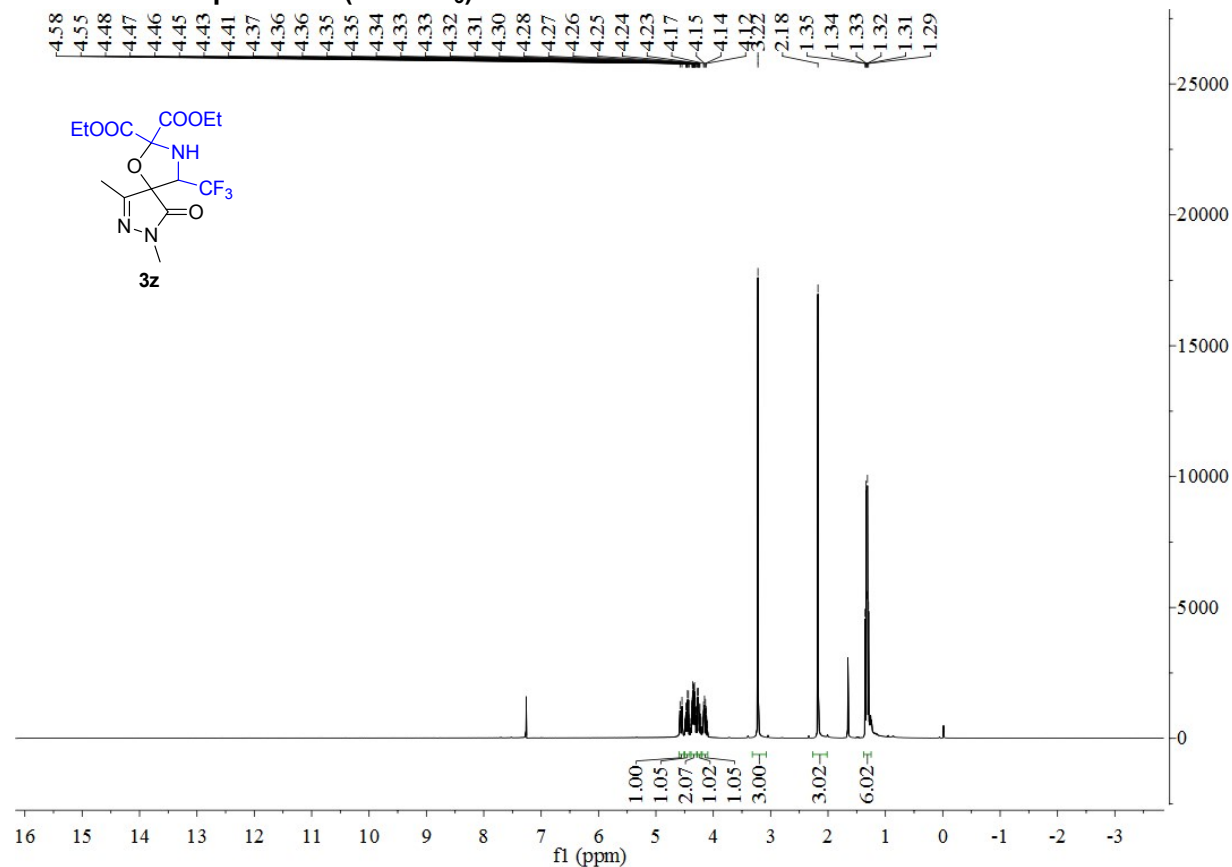

**<sup>13</sup>C NMR of compound 3z (in CDCl<sub>3</sub>)**

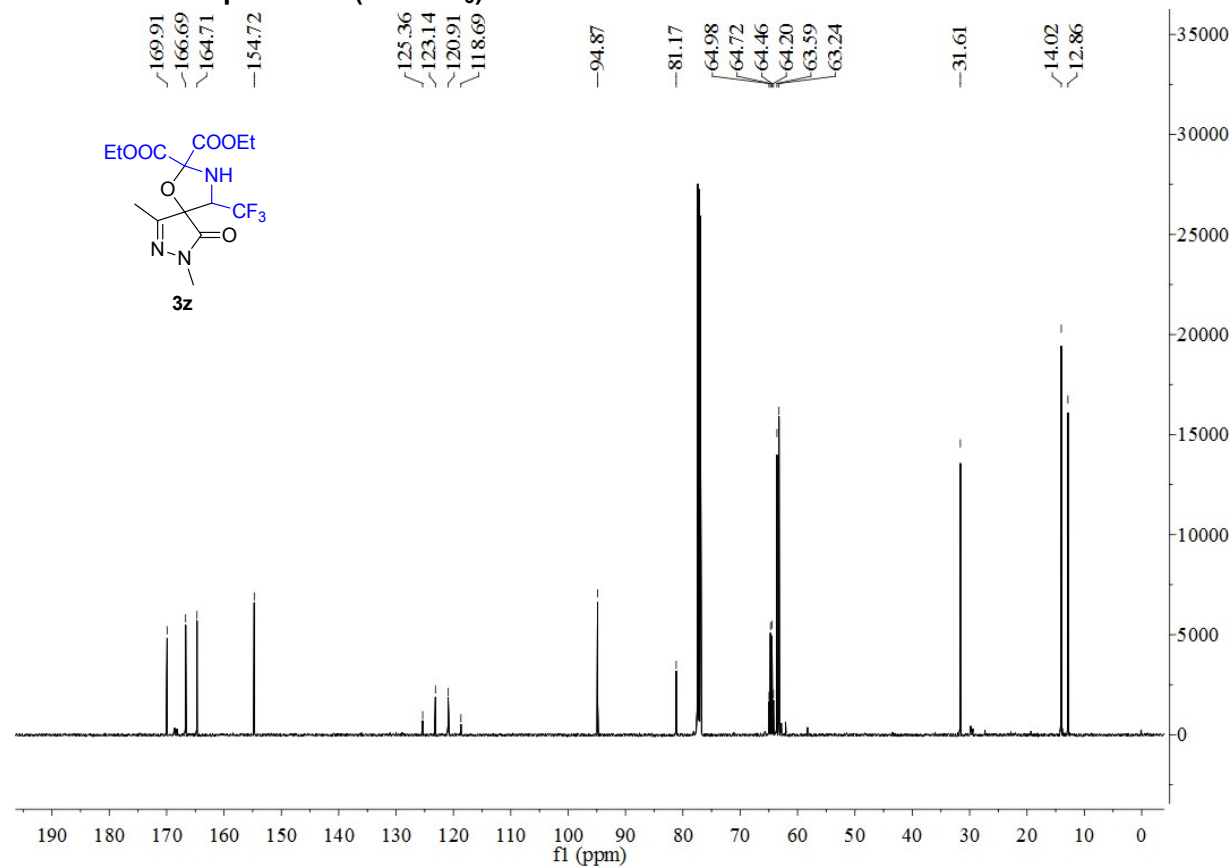



**$^{19}\text{F}$  NMR of compound 3z (in  $\text{CDCl}_3$ )**

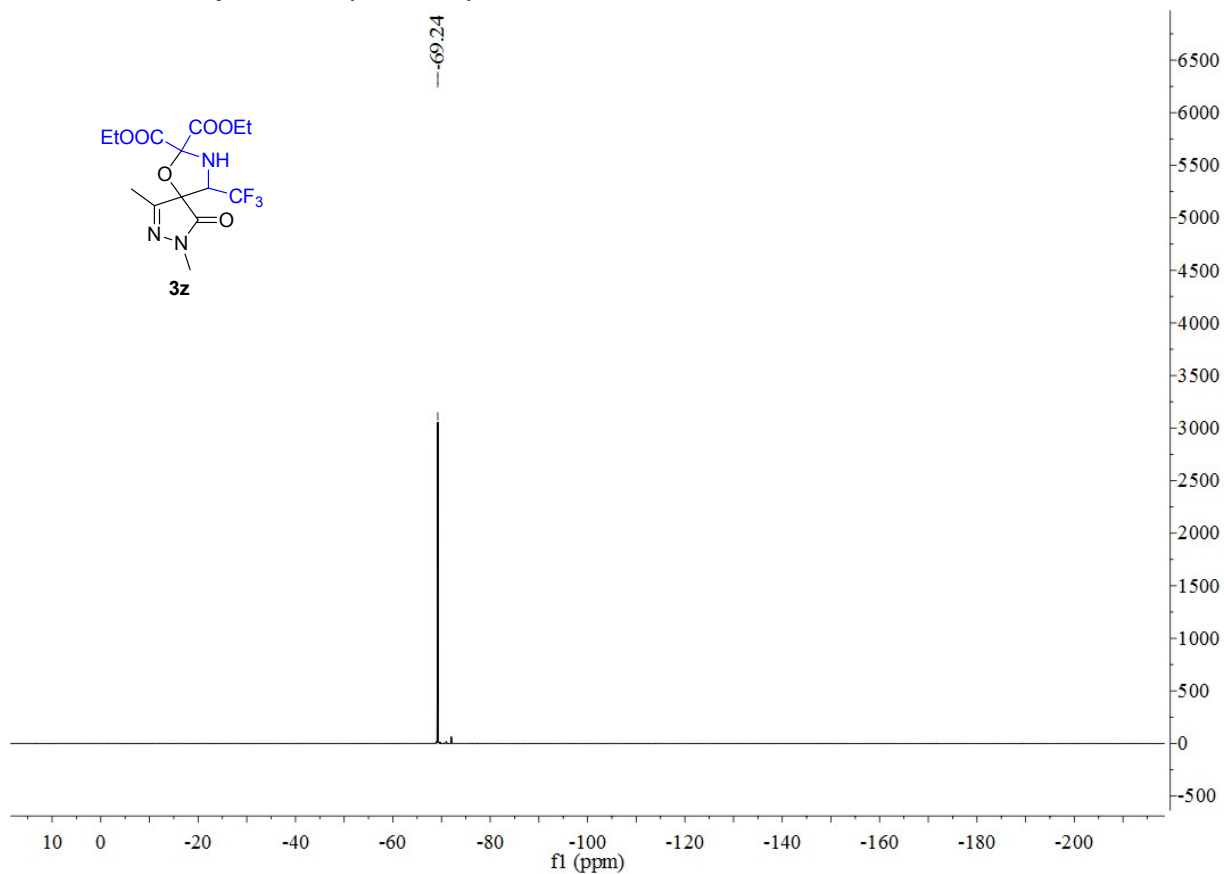

**$^1\text{H}$  NMR of compound 4a (in  $\text{CDCl}_3$ )**

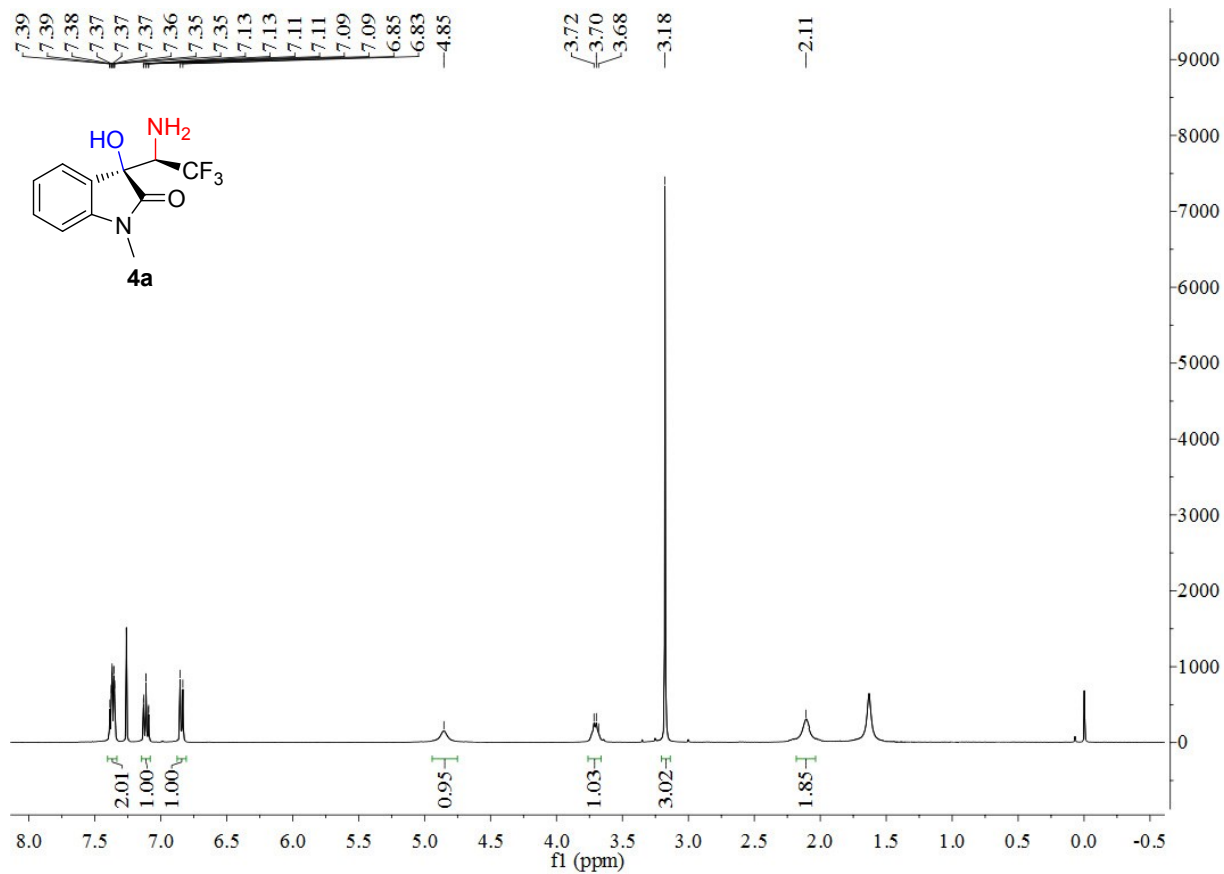

**$^{13}\text{C}$  NMR of compound 4a (in  $\text{CDCl}_3$ )**

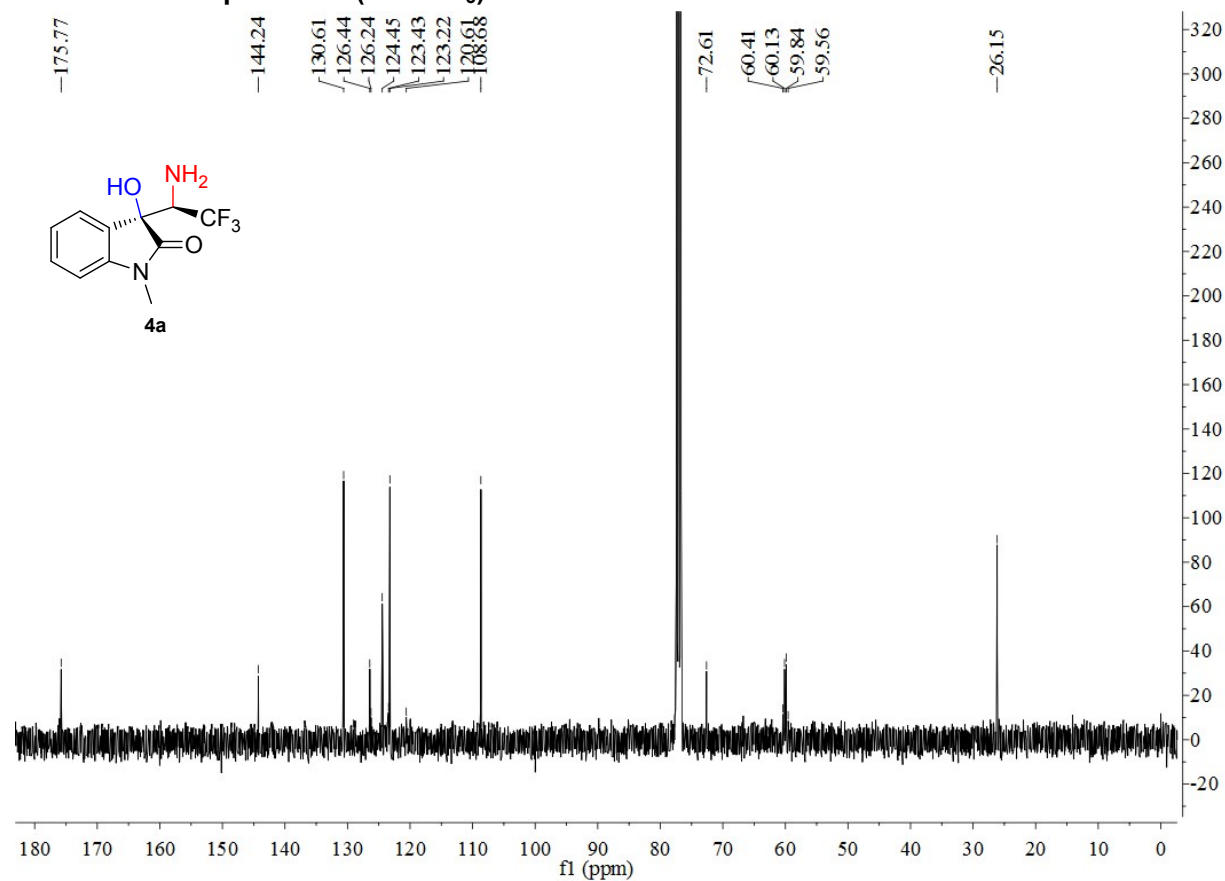

**$^{19}\text{F}$  NMR of compound 4a (in  $\text{CDCl}_3$ )**

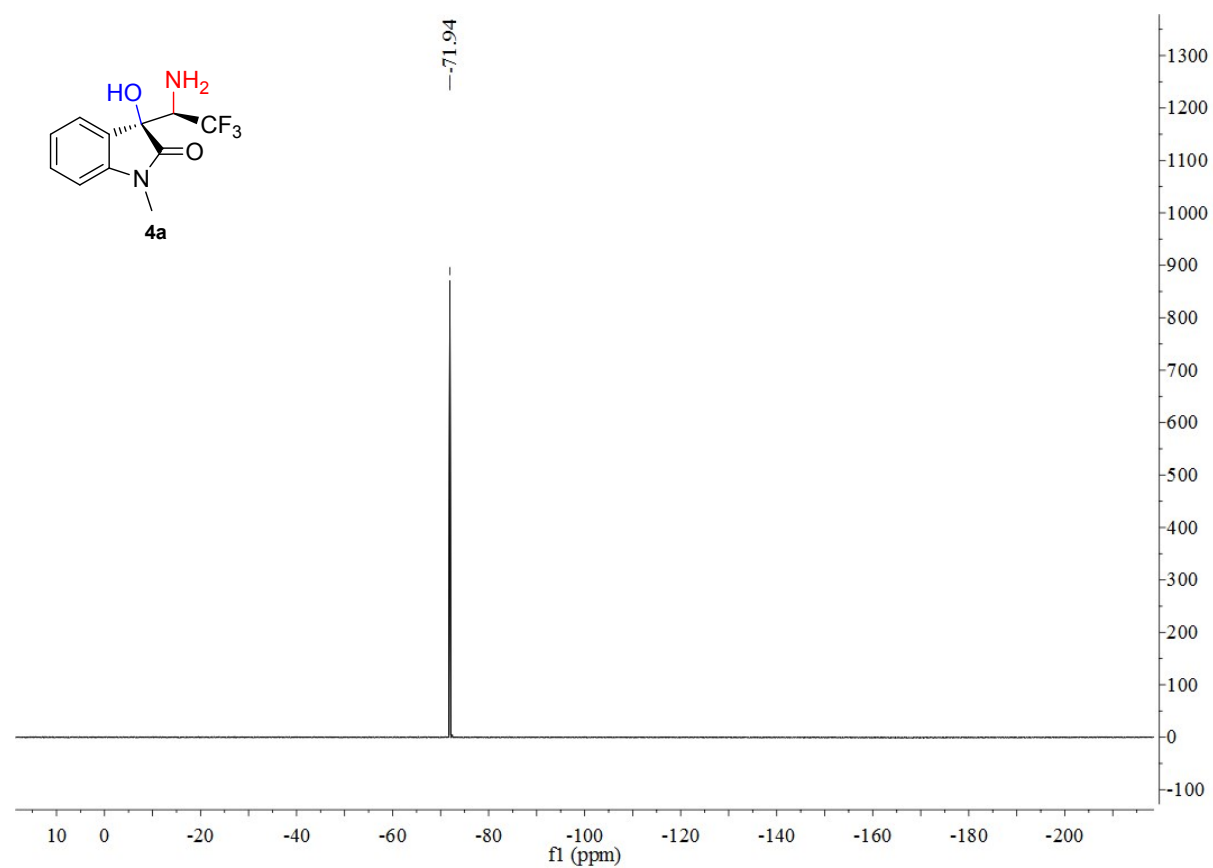

**<sup>1</sup>H NMR of compound 4y (in CDCl<sub>3</sub>)**

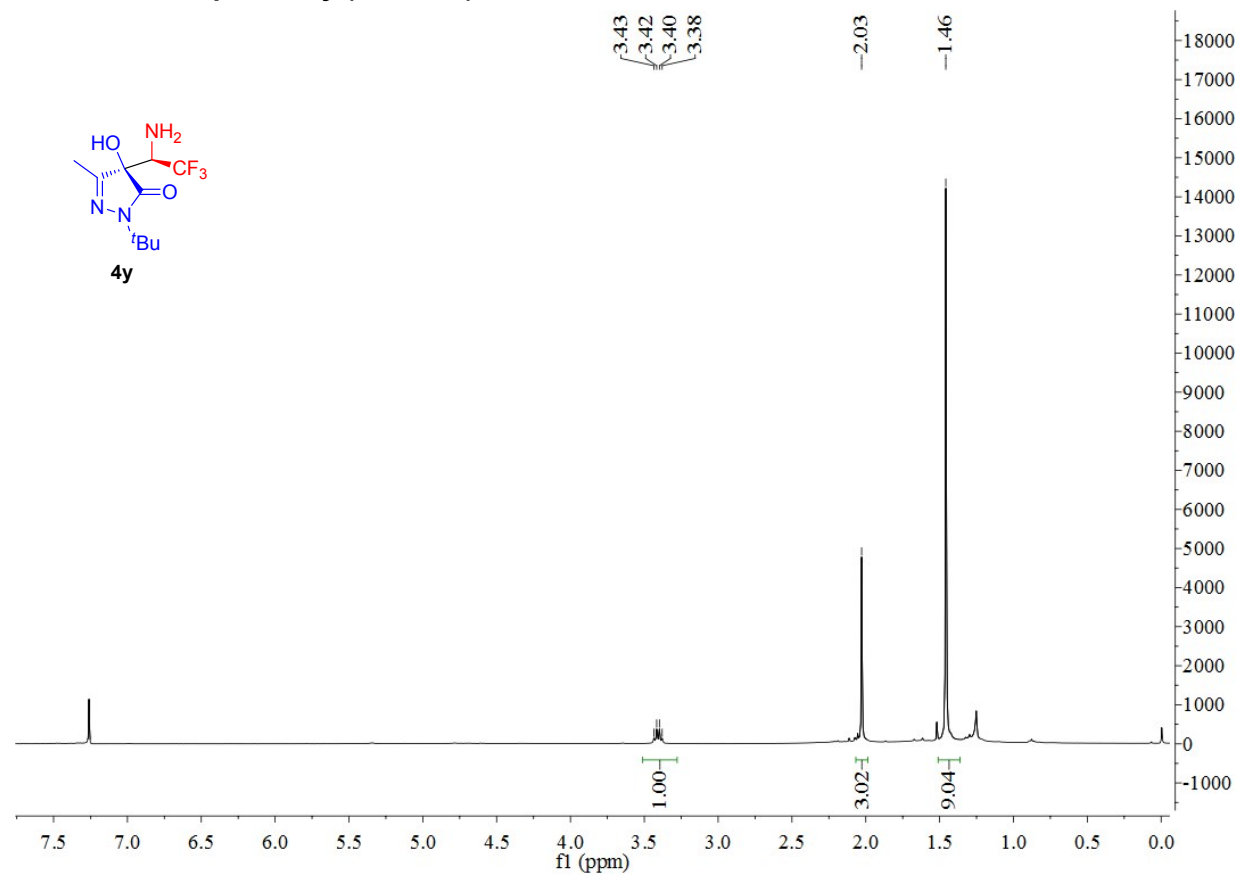

**<sup>13</sup>C NMR of compound 4y (in CDCl<sub>3</sub>)**

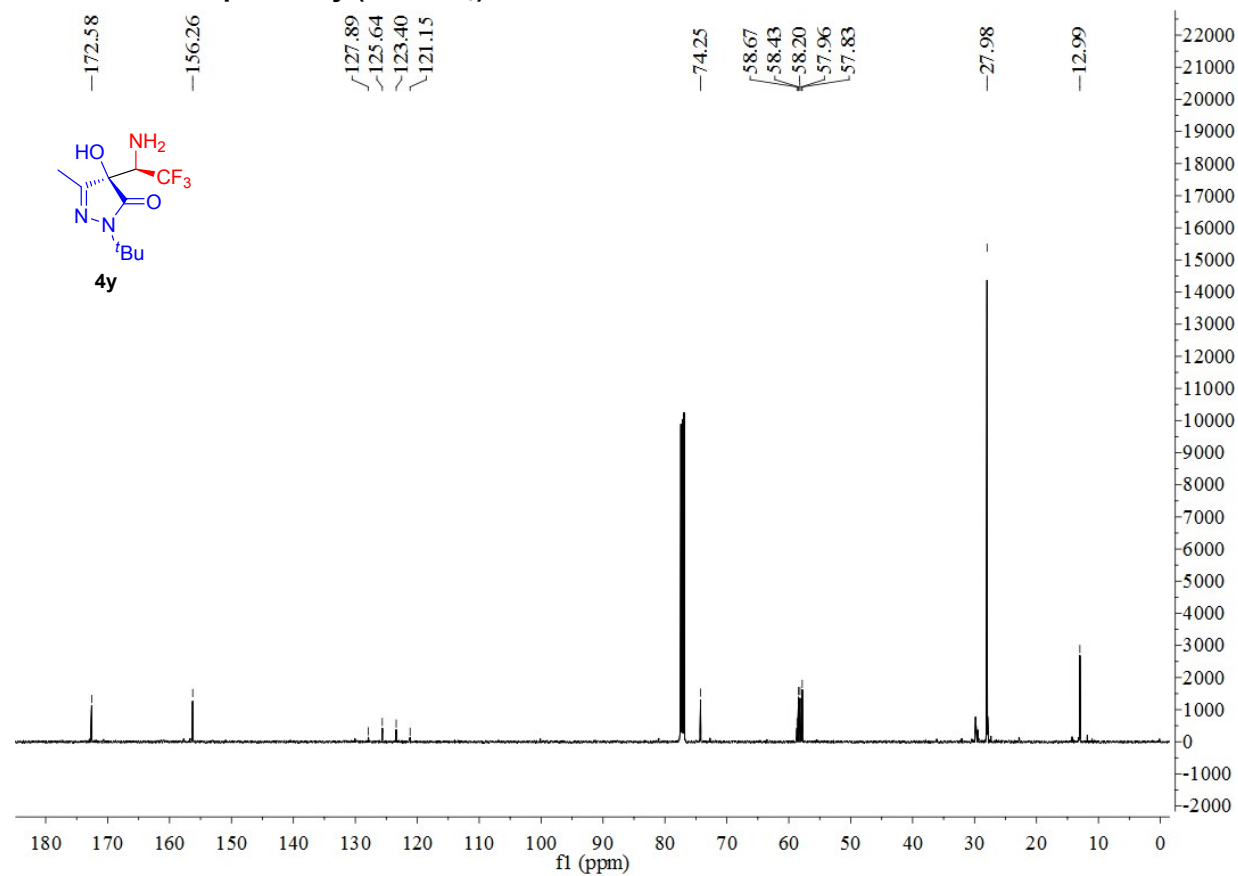

**$^{19}\text{F}$  NMR of compound 4y (in  $\text{CDCl}_3$ )**

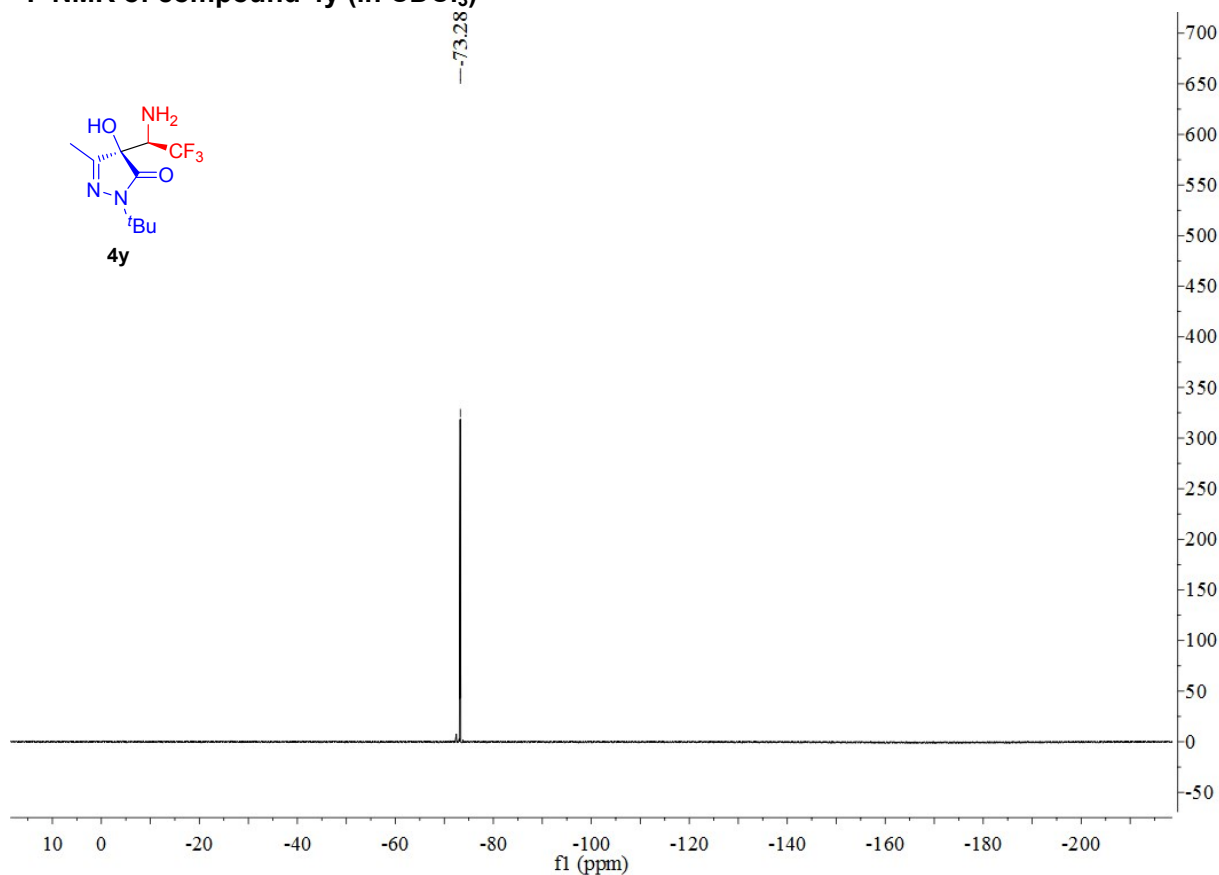

**$^1\text{H}$  NMR of compound 3ab (in  $\text{CDCl}_3$ )**

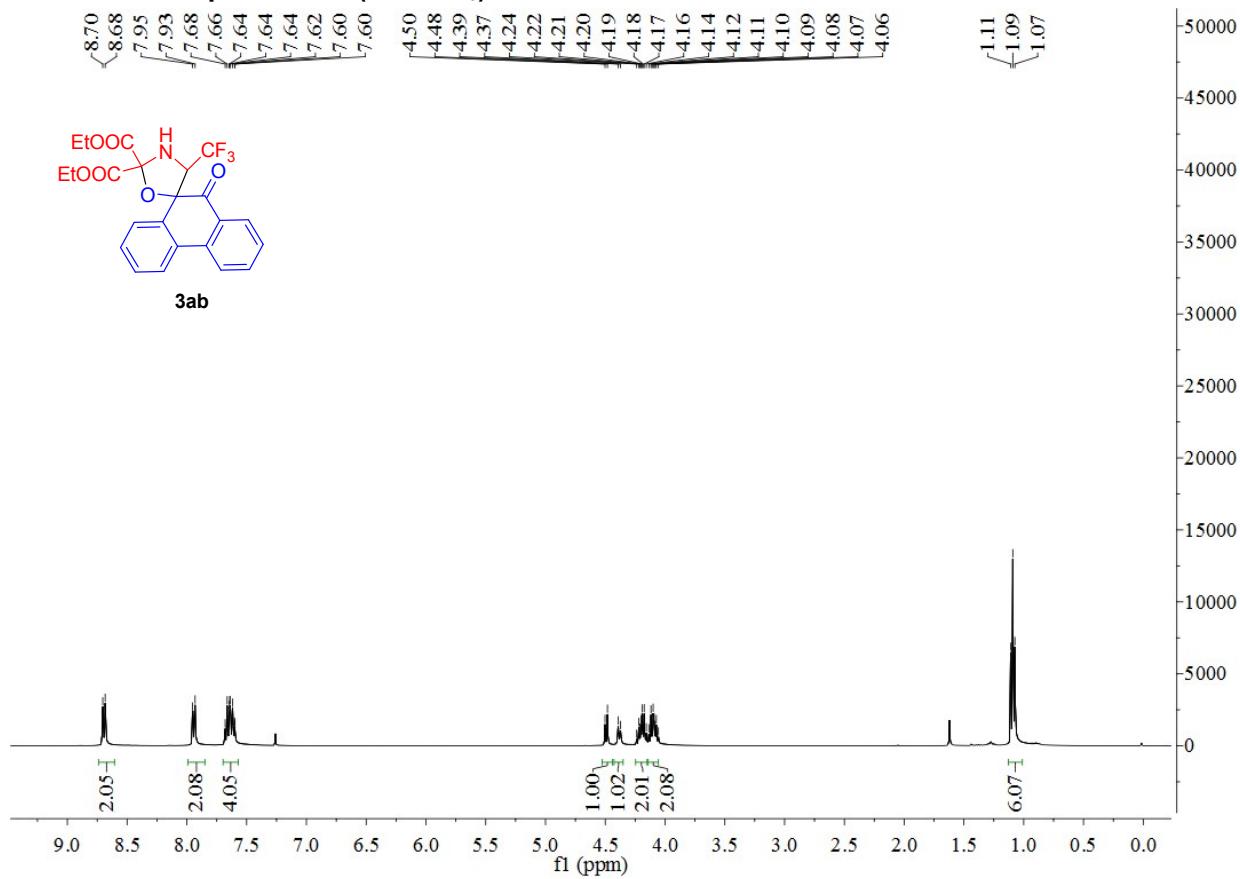

Chemical structure of **3ab** is shown, which is a 1,1-dimethyl-2,2,2-trifluoro-3,3-diphenyl-4,4-dihydro-1H-benzotriazin-4-one derivative. The structure features a central benzene ring fused to a five-membered ring containing a nitrogen atom and a carbonyl group. The nitrogen atom is substituted with two ethyl ester groups (EtOOC). The carbonyl carbon is substituted with a trifluoromethyl group (CF<sub>3</sub>).

The <sup>13</sup>C NMR spectrum (CDCl<sub>3</sub>) shows a single sharp peak at  $\delta$  85.37 ppm, corresponding to the solvent (CDCl<sub>3</sub>).

## 8. Copies of HPLC Spectra of Compounds

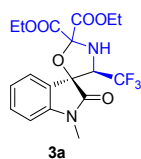

### HPLC spectrum of the racemate

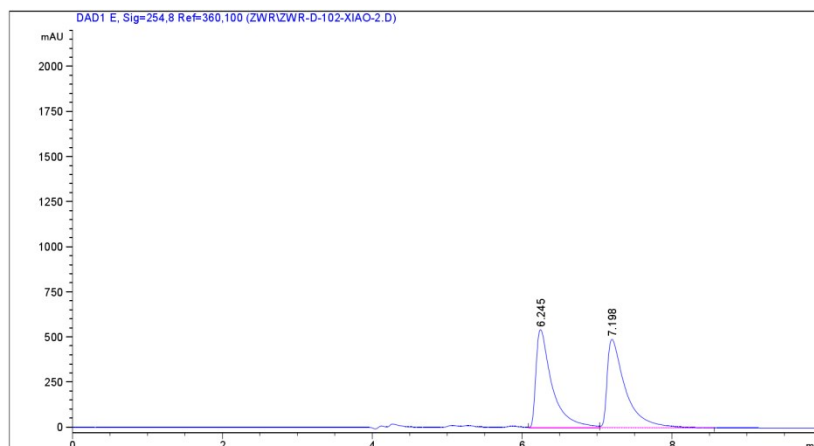

信号 1: DAD1 E, Sig=254,8 Ref=360,100

| 峰 # | 保留时间 [min] | 类型 | 峰宽 [min] | 峰面积 [mAU*s] | 峰高 [mAU]  | 峰面积 %   |
|-----|------------|----|----------|-------------|-----------|---------|
| 1   | 6.245      | VV | 0.2154   | 8071.95508  | 542.94879 | 49.4232 |
| 2   | 7.198      | VB | 0.2424   | 8260.35254  | 490.63766 | 50.5768 |

### HPLC spectrum of the chiral compound

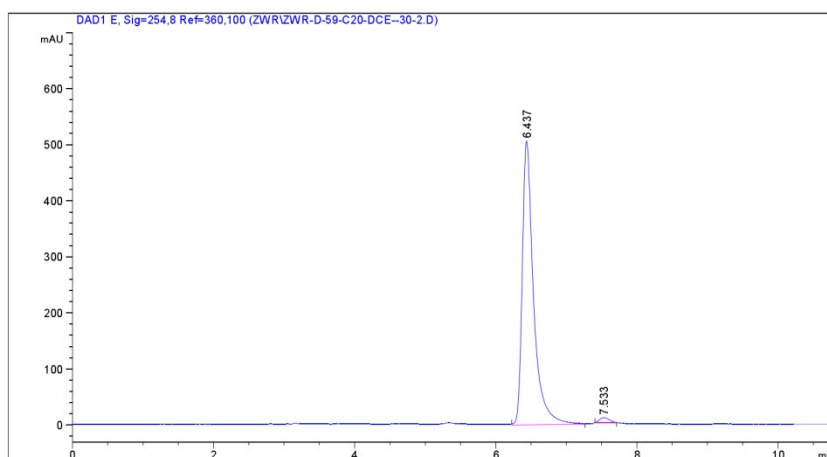

信号 1: DAD1 E, Sig=254,8 Ref=360,100

| 峰 # | 保留时间 [min] | 类型   | 峰宽 [min] | 峰面积 [mAU*s] | 峰高 [mAU]  | 峰面积 %   |
|-----|------------|------|----------|-------------|-----------|---------|
| 1   | 6.437      | MM R | 0.1851   | 5626.01758  | 506.70685 | 98.4868 |
| 2   | 7.533      | MM R | 0.1602   | 86.44145    | 8.99090   | 1.5132  |

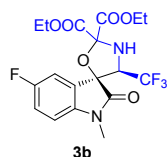

### HPLC spectrum of the racemate

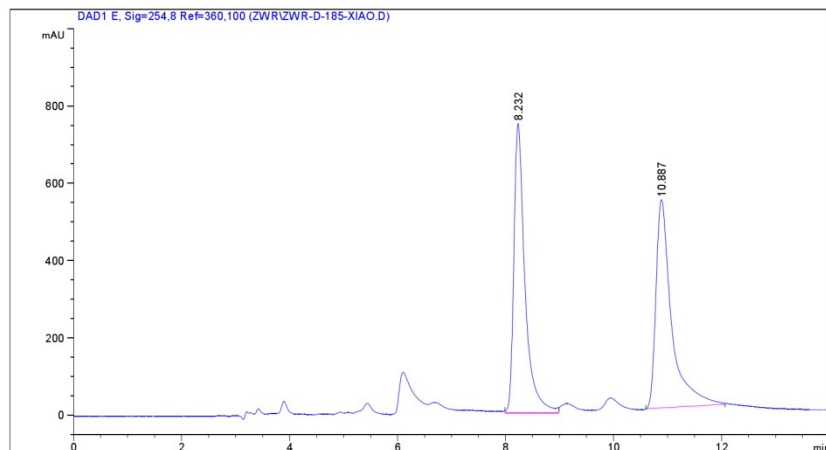

信号 1: DAD1 E, Sig=254,8 Ref=360,100

| 峰 # | 保留时间 [min] | 类型   | 峰宽 [min] | 峰面积 [mAU*s] | 峰高 [mAU]  | 峰面积 %   |
|-----|------------|------|----------|-------------|-----------|---------|
| 1   | 8.232      | MM R | 0.2386   | 1.07375e4   | 749.95599 | 49.7674 |
| 2   | 10.887     | MM R | 0.3350   | 1.08379e4   | 539.11768 | 50.2326 |

### HPLC spectrum of the chiral compound

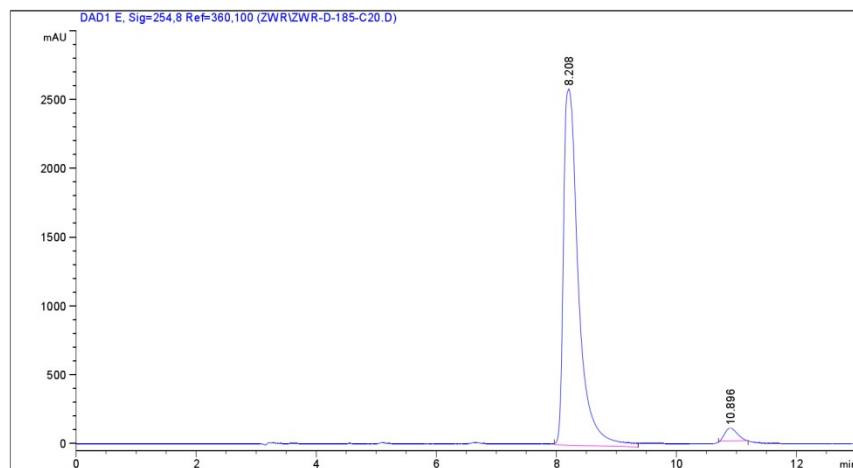

信号 1: DAD1 E, Sig=254,8 Ref=360,100

| 峰 # | 保留时间 [min] | 类型   | 峰宽 [min] | 峰面积 [mAU*s] | 峰高 [mAU]   | 峰面积 %   |
|-----|------------|------|----------|-------------|------------|---------|
| 1   | 8.208      | MM R | 0.2897   | 4.50090e4   | 2589.83960 | 97.1046 |
| 2   | 10.896     | MM R | 0.2357   | 1342.06641  | 94.91537   | 2.8954  |

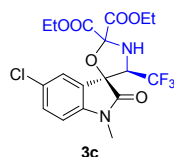

### HPLC spectrum of the racemate

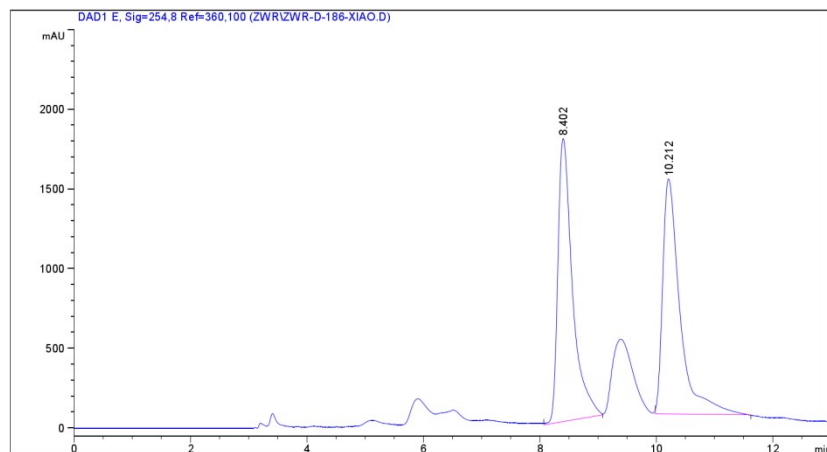

信号 1: DAD1 E, Sig=254,8 Ref=360,100

| 峰 # | 保留时间 [min] | 类型   | 峰宽 [min] | 峰面积 [mAU*s] | 峰高 [mAU]   | 峰面积 %   |
|-----|------------|------|----------|-------------|------------|---------|
| 1   | 8.402      | MM R | 0.2893   | 3.08358e4   | 1776.74500 | 50.2900 |
| 2   | 10.212     | MM R | 0.3444   | 3.04802e4   | 1475.09961 | 49.7100 |

### HPLC spectrum of the chiral compound

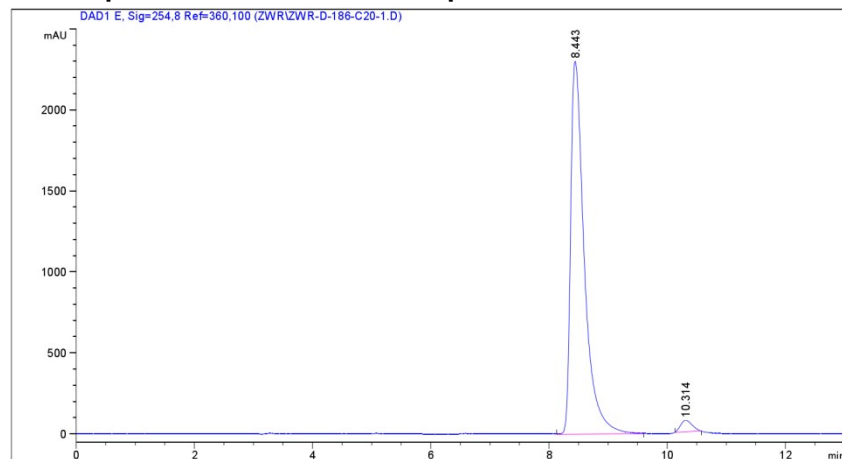

信号 1: DAD1 E, Sig=254,8 Ref=360,100

| 峰 # | 保留时间 [min] | 类型   | 峰宽 [min] | 峰面积 [mAU*s] | 峰高 [mAU]   | 峰面积 %   |
|-----|------------|------|----------|-------------|------------|---------|
| 1   | 8.443      | MM R | 0.2686   | 3.71184e4   | 2303.38599 | 97.5124 |
| 2   | 10.314     | MM R | 0.2216   | 946.91833   | 71.20676   | 2.4876  |



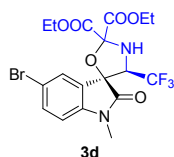

### HPLC spectrum of the racemate

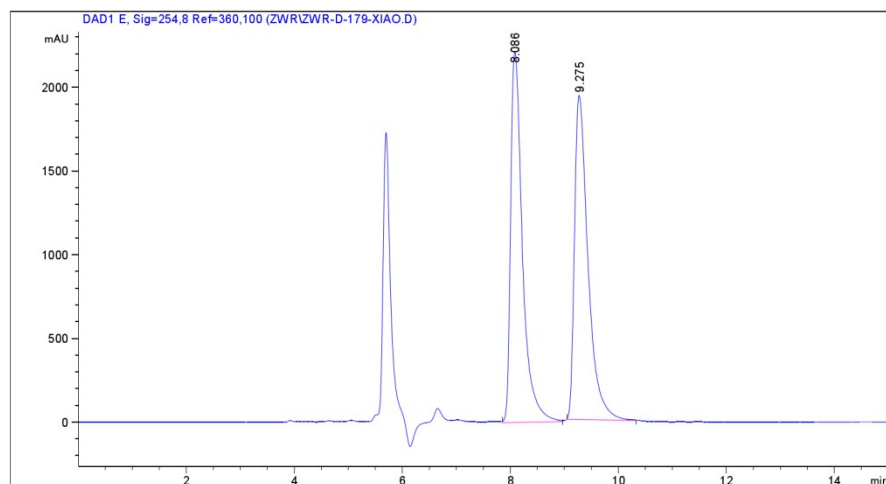

信号 1: DAD1 E, Sig=254,8 Ref=360,100

| 峰 # | 保留时间 [min] | 类型   | 峰宽 [min] | 峰面积 [mAU*s] | 峰高 [mAU]   | 峰面积 %   |
|-----|------------|------|----------|-------------|------------|---------|
| 1   | 8.086      | MM R | 0.2521   | 3.35187e4   | 2216.31592 | 49.9384 |
| 2   | 9.275      | MM R | 0.2892   | 3.36014e4   | 1936.74280 | 50.0616 |

### HPLC spectrum of the chiral compound

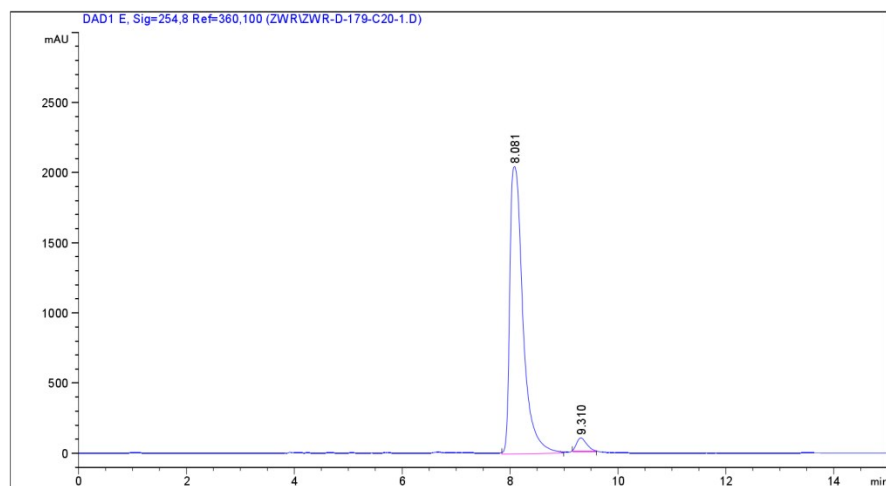

信号 1: DAD1 E, Sig=254,8 Ref=360,100

| 峰 # | 保留时间 [min] | 类型   | 峰宽 [min] | 峰面积 [mAU*s] | 峰高 [mAU]   | 峰面积 %   |
|-----|------------|------|----------|-------------|------------|---------|
| 1   | 8.081      | MM R | 0.2821   | 3.46698e4   | 2048.64160 | 96.5048 |
| 2   | 9.310      | MM R | 0.2188   | 1255.65295  | 95.63361   | 3.4952  |

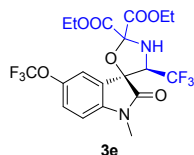

### HPLC spectrum of the racemate

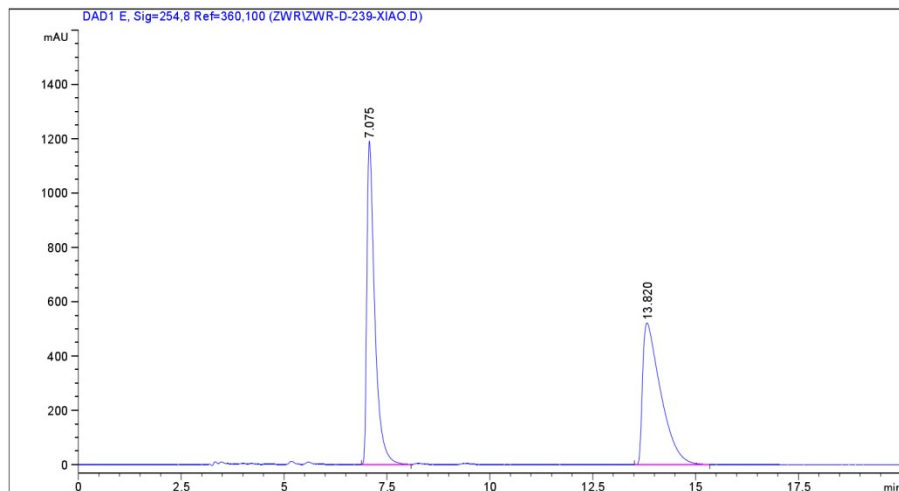

信号 1: DAD1 E, Sig=254,8 Ref=360,100

| 峰 # | 保留时间 [min] | 类型 | 峰宽 [min] | 峰面积 [mAU*s] | 峰高 [mAU]   | 峰面积 %   |
|-----|------------|----|----------|-------------|------------|---------|
| 1   | 7.075      | BV | 0.1985   | 1.59620e4   | 1190.16321 | 49.9877 |
| 2   | 13.820     | BB | 0.4449   | 1.59698e4   | 521.99591  | 50.0123 |

### HPLC spectrum of the chiral compound

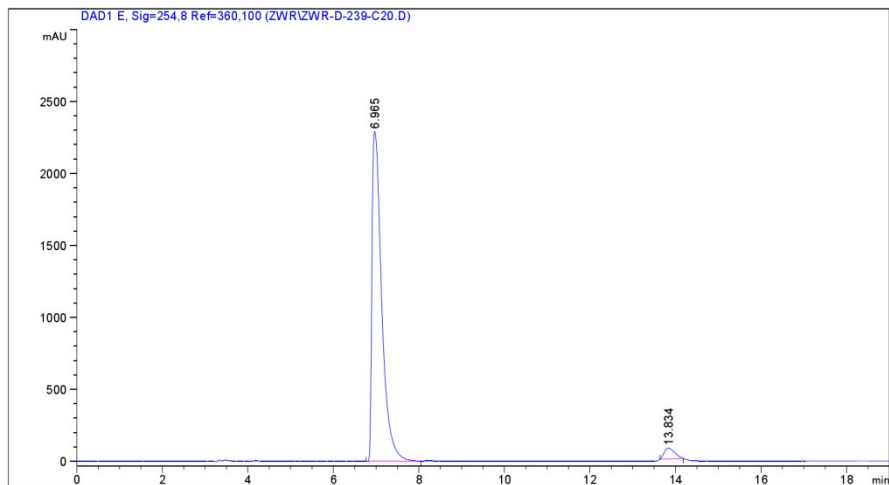

信号 1: DAD1 E, Sig=254,8 Ref=360,100

| 峰 # | 保留时间 [min] | 类型   | 峰宽 [min] | 峰面积 [mAU*s] | 峰高 [mAU]   | 峰面积 %   |
|-----|------------|------|----------|-------------|------------|---------|
| 1   | 6.965      | BV   | 0.2402   | 3.61492e4   | 2289.11157 | 96.6393 |
| 2   | 13.834     | MM R | 0.2819   | 1257.12305  | 74.33344   | 3.3607  |

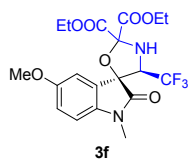

### HPLC spectrum of the racemate

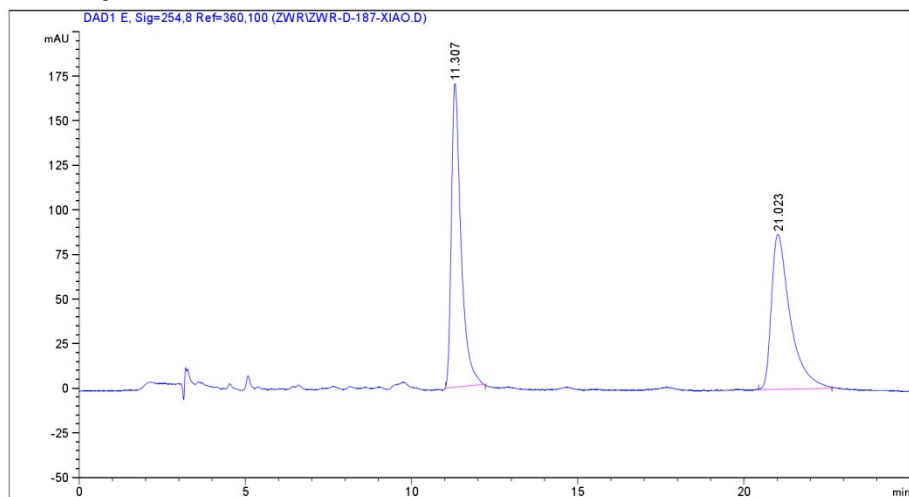

信号 1: DAD1 E, Sig=254,8 Ref=360,100

| 峰 # | 保留时间 [min] | 类型   | 峰宽 [min] | 峰面积 [mAU*s] | 峰高 [mAU]  | 峰面积 %   |
|-----|------------|------|----------|-------------|-----------|---------|
| 1   | 11.307     | MM R | 0.3362   | 3433.17090  | 170.20604 | 50.1833 |
| 2   | 21.023     | BB   | 0.5698   | 3408.08813  | 86.85492  | 49.8167 |

### HPLC spectrum of the chiral compound

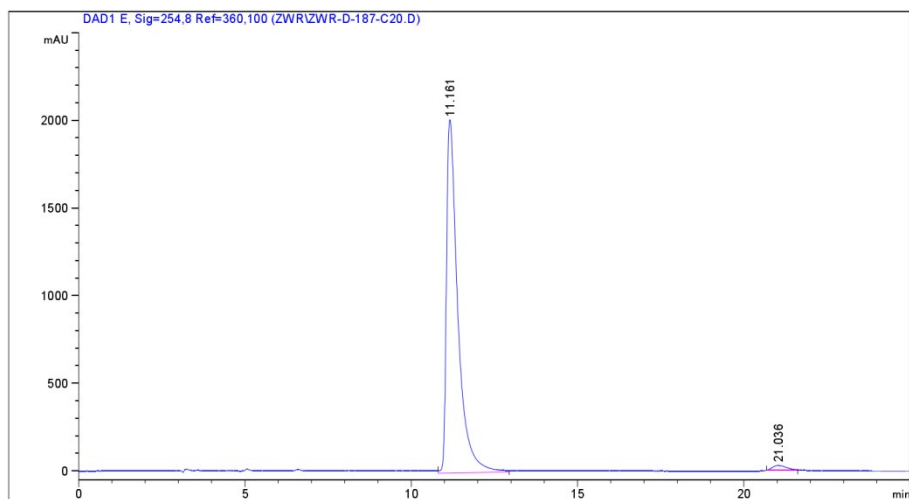

信号 1: DAD1 E, Sig=254,8 Ref=360,100

| 峰 # | 保留时间 [min] | 类型   | 峰宽 [min] | 峰面积 [mAU*s] | 峰高 [mAU]   | 峰面积 %   |
|-----|------------|------|----------|-------------|------------|---------|
| 1   | 11.161     | MM R | 0.3966   | 4.79681e4   | 2015.66321 | 98.5663 |
| 2   | 21.036     | MM R | 0.4639   | 697.73688   | 25.06953   | 1.4337  |

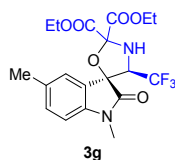

## HPLC spectrum of the racemate

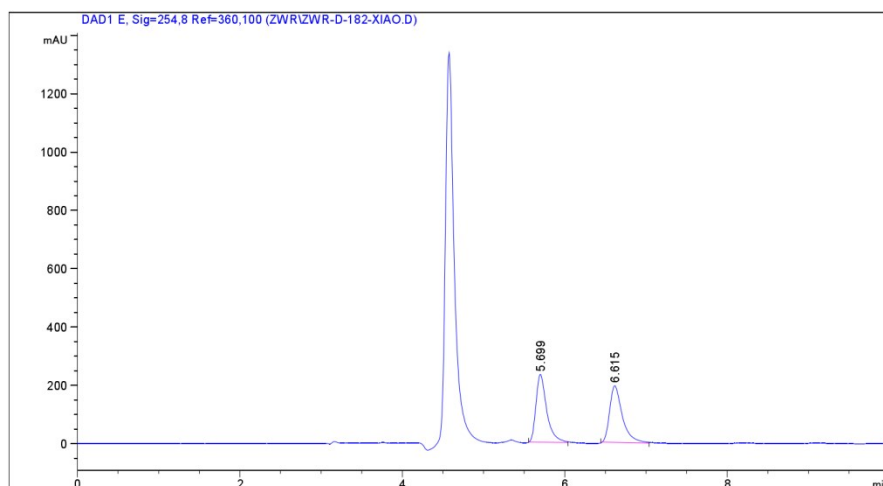

信号 1: DAD1 E, Sig=254,8 Ref=360,100

| 峰 # | 保留时间 [min] | 类型   | 峰宽 [min] | 峰面积 [mAU*s] | 峰高 [mAU]  | 峰面积 %   |
|-----|------------|------|----------|-------------|-----------|---------|
| 1   | 5.699      | MM R | 0.1526   | 2133.52319  | 233.02663 | 50.4447 |
| 2   | 6.615      | MM R | 0.1800   | 2095.90356  | 194.08434 | 49.5553 |

## HPLC spectrum of the chiral compound

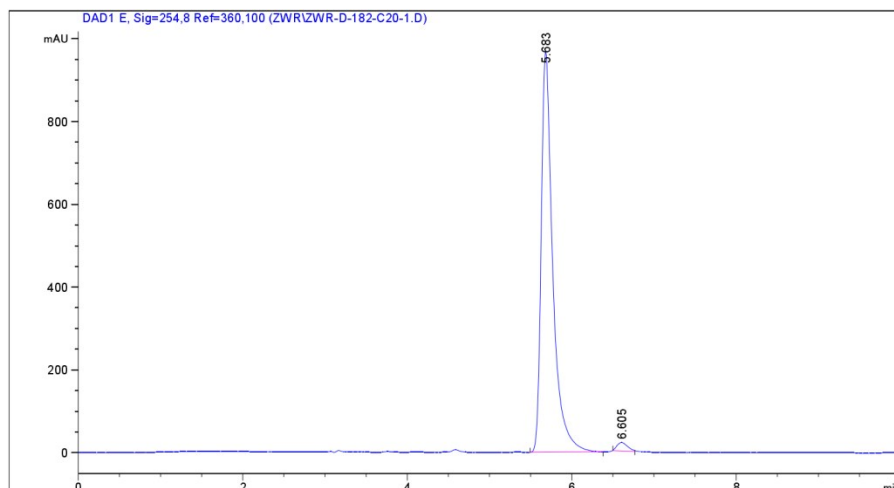

信号 1: DAD1 E, Sig=254,8 Ref=360,100

| 峰 # | 保留时间 [min] | 类型   | 峰宽 [min] | 峰面积 [mAU*s] | 峰高 [mAU]  | 峰面积 %   |
|-----|------------|------|----------|-------------|-----------|---------|
| 1   | 5.683      | MM R | 0.1622   | 9418.52637  | 967.80298 | 98.1174 |
| 2   | 6.605      | MM R | 0.1475   | 180.71445   | 20.42197  | 1.8826  |

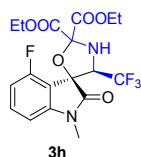

## HPLC spectrum of the racemate

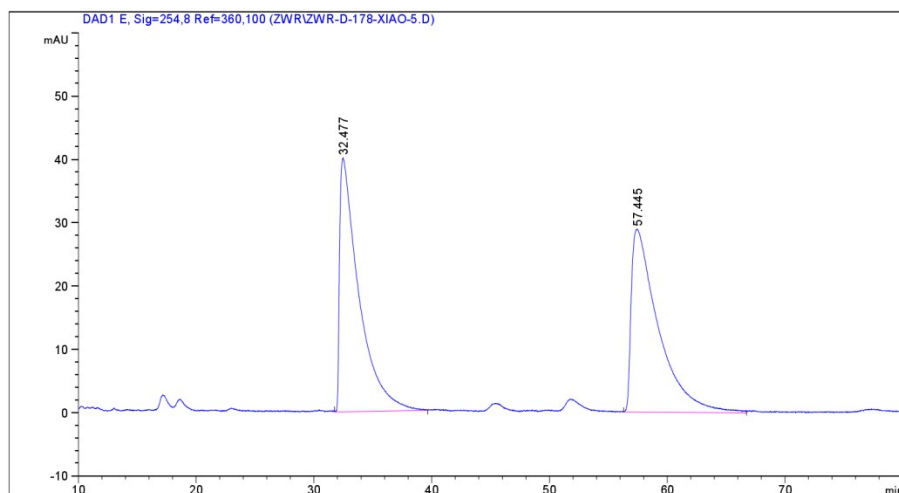

信号 1: DAD1 E, Sig=254,8 Ref=360,100

| 峰 # | 保留时间 [min] | 类型   | 峰宽 [min] | 峰面积 [mAU*s] | 峰高 [mAU] | 峰面积 %   |
|-----|------------|------|----------|-------------|----------|---------|
| 1   | 32.477     | MM R | 1.8912   | 4549.71289  | 40.09584 | 49.6162 |
| 2   | 57.445     | MM R | 2.6625   | 4620.09131  | 28.92040 | 50.3838 |

## HPLC spectrum of the chiral compound

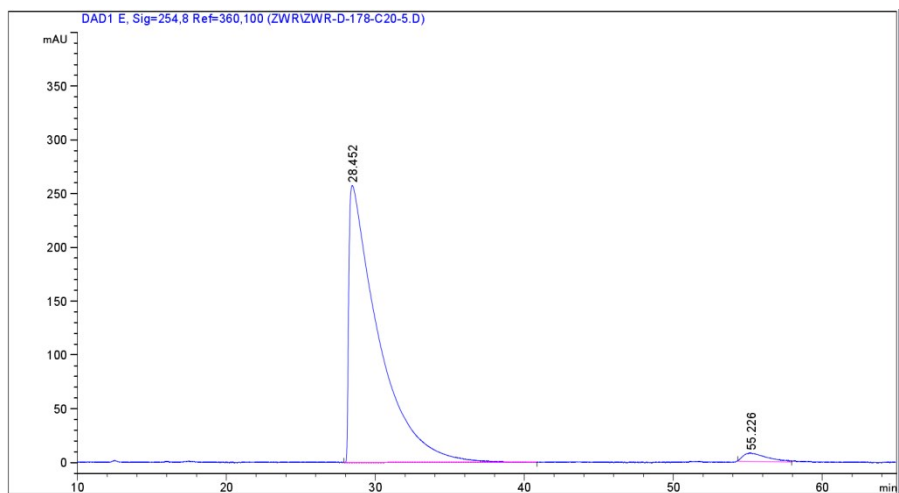

信号 1: DAD1 E, Sig=254,8 Ref=360,100

| 峰 # | 保留时间 [min] | 类型   | 峰宽 [min] | 峰面积 [mAU*s] | 峰高 [mAU]  | 峰面积 %   |
|-----|------------|------|----------|-------------|-----------|---------|
| 1   | 28.452     | MM R | 2.2854   | 3.53003e4   | 257.43811 | 97.5789 |
| 2   | 55.226     | MM R | 1.9014   | 875.87122   | 7.67730   | 2.4211  |

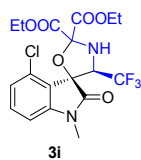

## HPLC spectrum of the racemate

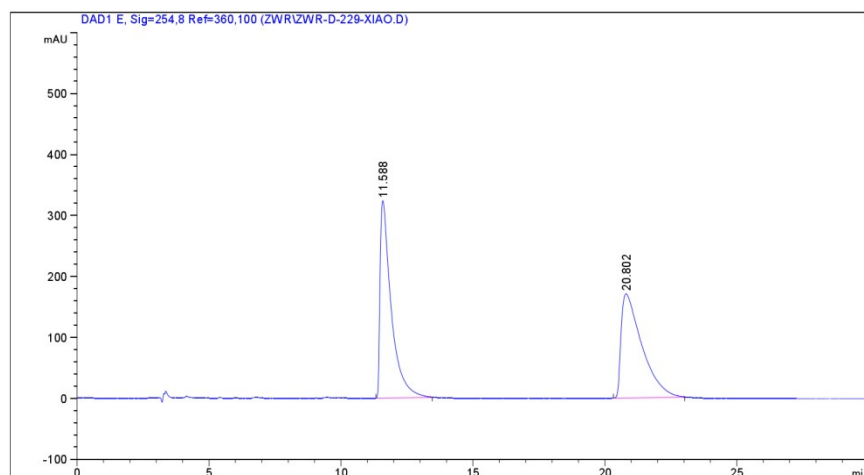

信号 1: DAD1 E, Sig=254,8 Ref=360,100

| 峰 # | 保留时间 [min] | 类型 | 峰宽 [min] | 峰面积 [mAU*s] | 峰高 [mAU]  | 峰面积 %   |
|-----|------------|----|----------|-------------|-----------|---------|
| 1   | 11.588     | BB | 0.4209   | 9465.59375  | 323.95599 | 50.3167 |
| 2   | 20.802     | BB | 0.7903   | 9346.42480  | 170.82303 | 49.6833 |

## HPLC spectrum of the chiral compound

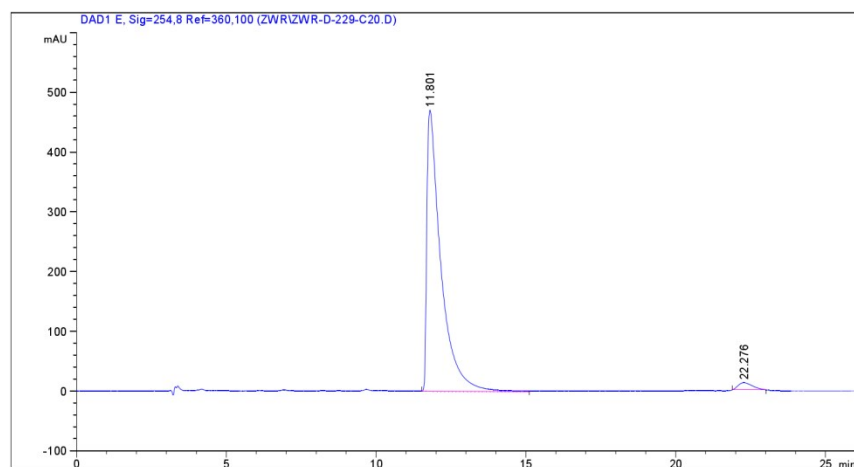

信号 1: DAD1 E, Sig=254,8 Ref=360,100

| 峰 # | 保留时间 [min] | 类型   | 峰宽 [min] | 峰面积 [mAU*s] | 峰高 [mAU]  | 峰面积 %   |
|-----|------------|------|----------|-------------|-----------|---------|
| 1   | 11.801     | MM R | 0.5435   | 1.53492e4   | 470.71323 | 97.6325 |
| 2   | 22.276     | MM R | 0.5403   | 372.20627   | 11.48090  | 2.3675  |

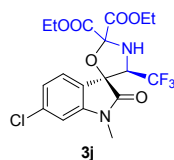

## HPLC spectrum of the racemate

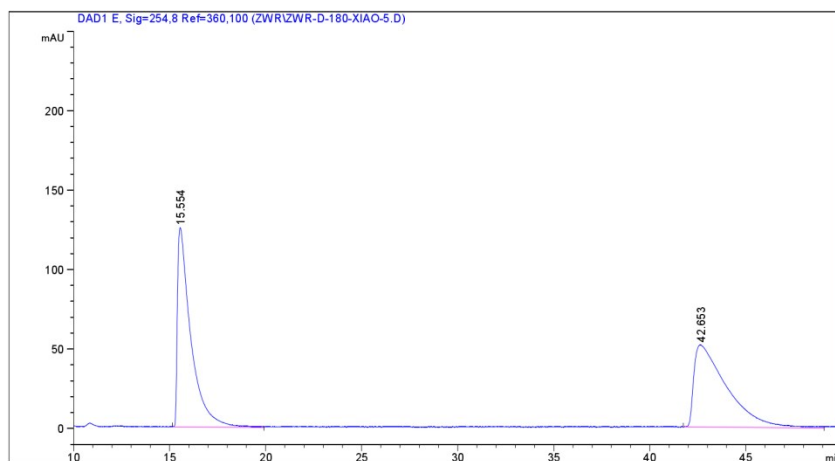

信号 1: DAD1 E, Sig=254,8 Ref=360,100

| 峰 # | 保留时间 [min] | 类型   | 峰宽 [min] | 峰面积 [mAU*s] | 峰高 [mAU]  | 峰面积 %   |
|-----|------------|------|----------|-------------|-----------|---------|
| 1   | 15.554     | MM R | 0.8107   | 6100.55566  | 125.41557 | 49.6984 |
| 2   | 42.653     | MM R | 1.9952   | 6174.60400  | 51.57790  | 50.3016 |

## HPLC spectrum of the chiral compound

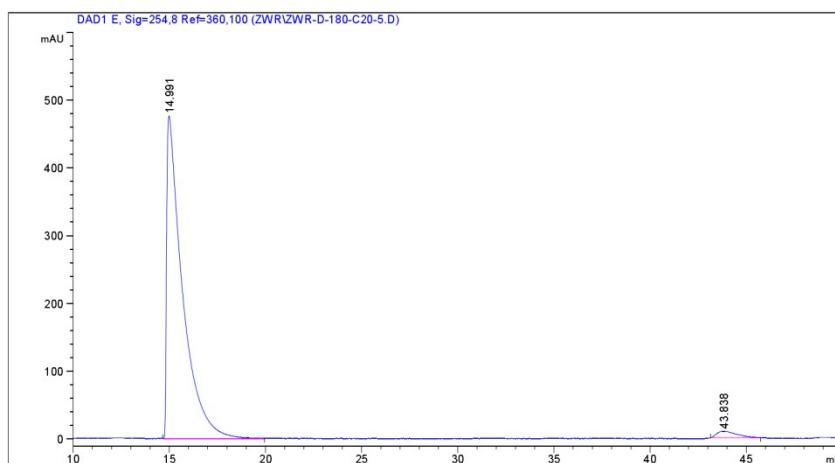

信号 1: DAD1 E, Sig=254,8 Ref=360,100

| 峰 # | 保留时间 [min] | 类型   | 峰宽 [min] | 峰面积 [mAU*s] | 峰高 [mAU]  | 峰面积 %   |
|-----|------------|------|----------|-------------|-----------|---------|
| 1   | 14.991     | MM R | 0.9488   | 2.71094e4   | 476.22778 | 97.5234 |
| 2   | 43.838     | MM R | 1.2126   | 688.44714   | 9.46276   | 2.4766  |

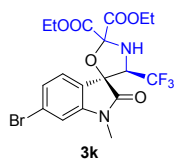

## HPLC spectrum of the racemate

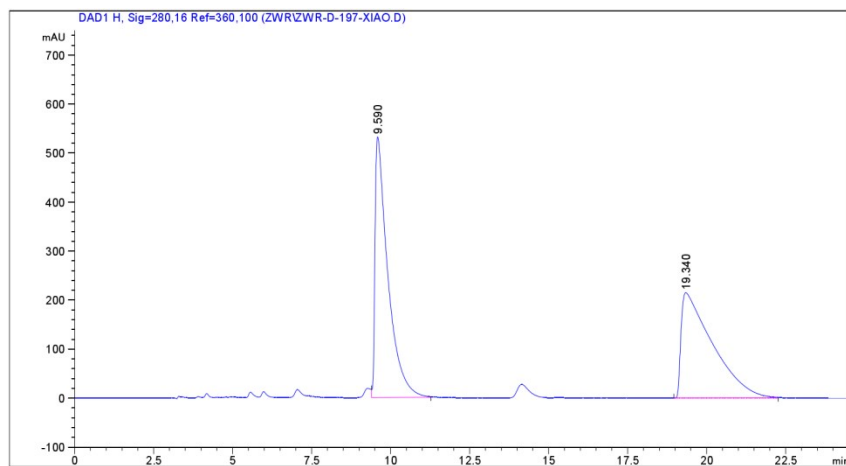

信号 1: DAD1 H, Sig=280,16 Ref=360,100

| 峰 # | 保留时间 [min] | 类型 | 峰宽 [min] | 峰面积 [mAU*s] | 峰高 [mAU]  | 峰面积 %   |
|-----|------------|----|----------|-------------|-----------|---------|
| 1   | 9.590      | VB | 0.3968   | 1.49935e4   | 532.07349 | 50.3271 |
| 2   | 19.340     | BB | 0.9614   | 1.47986e4   | 214.89743 | 49.6729 |

## HPLC spectrum of the chiral compound

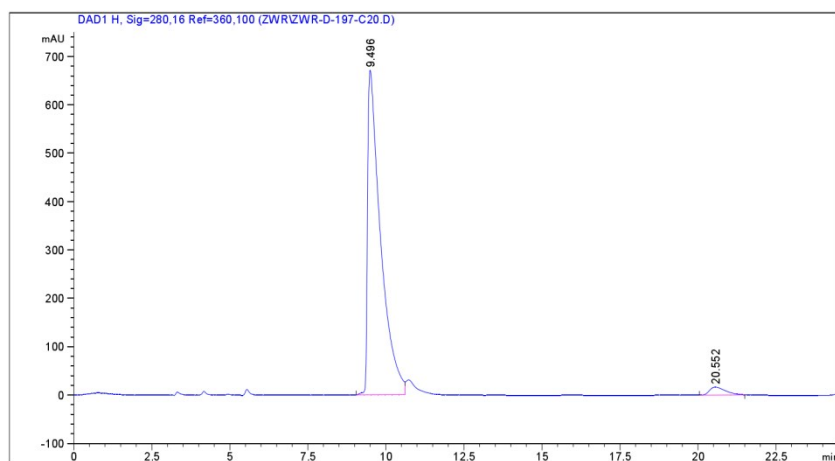

信号 1: DAD1 H, Sig=280,16 Ref=360,100

| 峰 # | 保留时间 [min] | 类型 | 峰宽 [min] | 峰面积 [mAU*s] | 峰高 [mAU]  | 峰面积 %   |
|-----|------------|----|----------|-------------|-----------|---------|
| 1   | 9.496      | BV | 0.4057   | 1.94314e4   | 671.24786 | 97.0382 |
| 2   | 20.552     | BB | 0.5411   | 593.07715   | 16.58925  | 2.9618  |



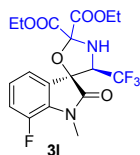

## HPLC spectrum of the racemate

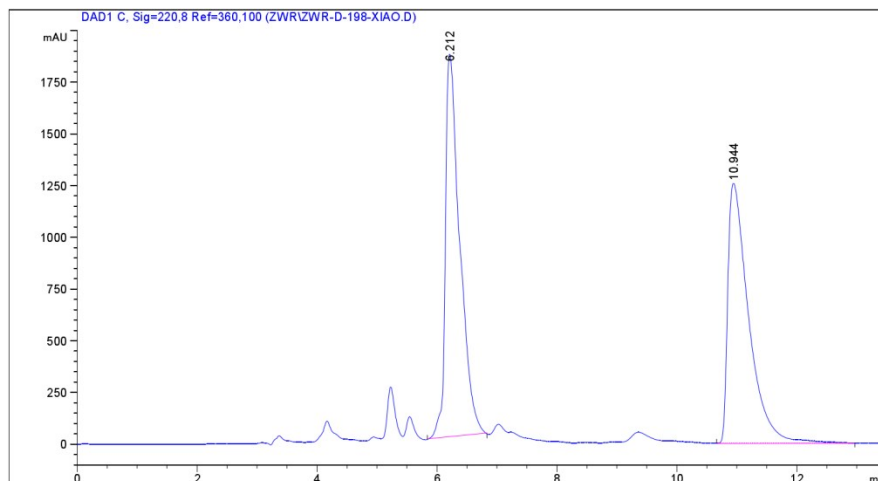

信号 1: DAD1 C, Sig=220,8 Ref=360,100

| 峰 # | 保留时间 [min] | 类型   | 峰宽 [min] | 峰面积 [mAU*s] | 峰高 [mAU]   | 峰面积 %   |
|-----|------------|------|----------|-------------|------------|---------|
| 1   | 6.212      | MM R | 0.2769   | 3.07272e4   | 1849.41077 | 50.2942 |
| 2   | 10.944     | VB   | 0.3597   | 3.03678e4   | 1257.90369 | 49.7058 |

## HPLC spectrum of the chiral compound

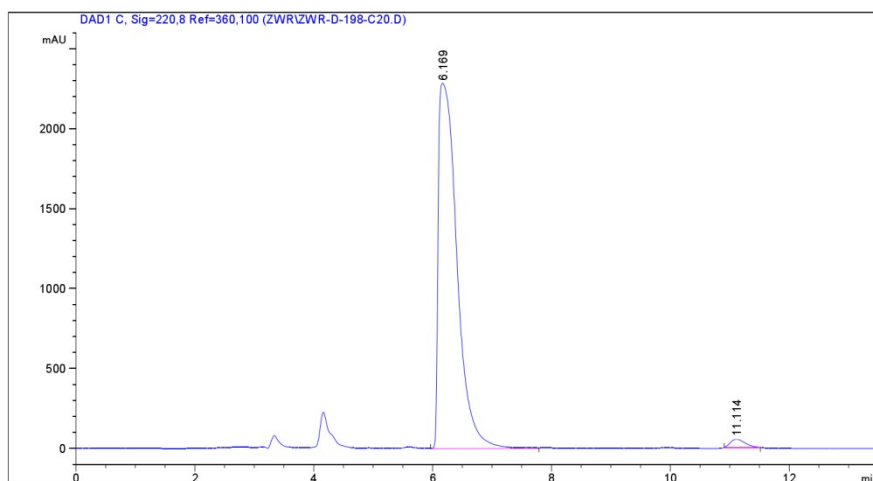

信号 1: DAD1 C, Sig=220,8 Ref=360,100

| 峰 # | 保留时间 [min] | 类型   | 峰宽 [min] | 峰面积 [mAU*s] | 峰高 [mAU]   | 峰面积 %   |
|-----|------------|------|----------|-------------|------------|---------|
| 1   | 6.169      | MM R | 0.3627   | 4.97712e4   | 2287.07739 | 98.3224 |
| 2   | 11.114     | MM R | 0.2766   | 849.21753   | 51.16344   | 1.6776  |

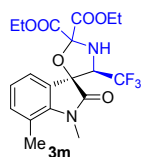

## HPLC spectrum of the racemate

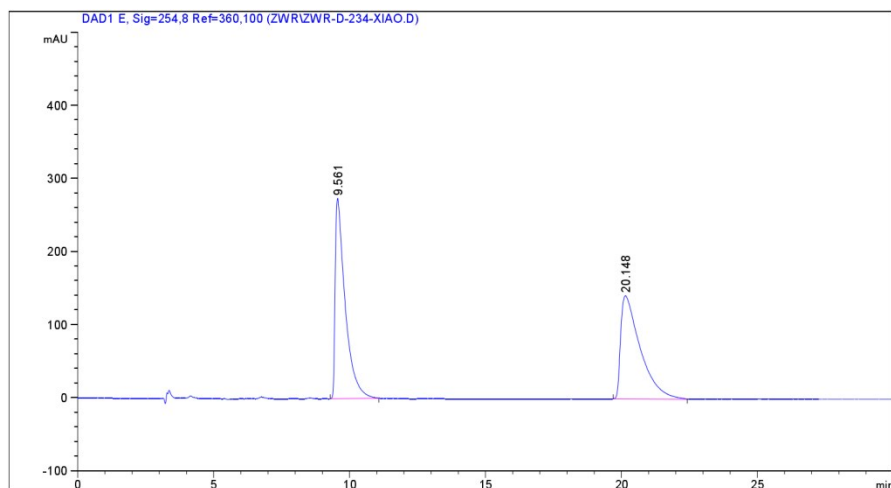

信号 1: DAD1 E, Sig=254,8 Ref=360,100

| 峰 # | 保留时间 [min] | 类型 | 峰宽 [min] | 峰面积 [mAU*s] | 峰高 [mAU]  | 峰面积 %   |
|-----|------------|----|----------|-------------|-----------|---------|
| 1   | 9.561      | BB | 0.3661   | 7005.50391  | 274.20383 | 49.7717 |
| 2   | 20.148     | BB | 0.7218   | 7069.77979  | 141.28125 | 50.2283 |

## HPLC spectrum of the chiral compound

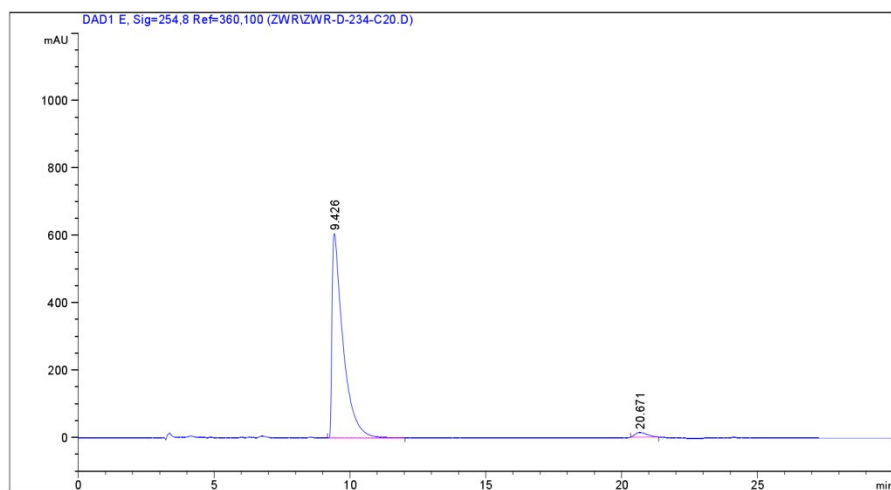

信号 1: DAD1 E, Sig=254,8 Ref=360,100

| 峰 # | 保留时间 [min] | 类型   | 峰宽 [min] | 峰面积 [mAU*s] | 峰高 [mAU]  | 峰面积 %   |
|-----|------------|------|----------|-------------|-----------|---------|
| 1   | 9.426      | MM R | 0.4688   | 1.70727e4   | 606.96600 | 97.5528 |
| 2   | 20.671     | MM R | 0.5205   | 428.29263   | 13.71483  | 2.4472  |

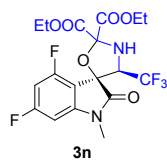

## HPLC spectrum of the racemate

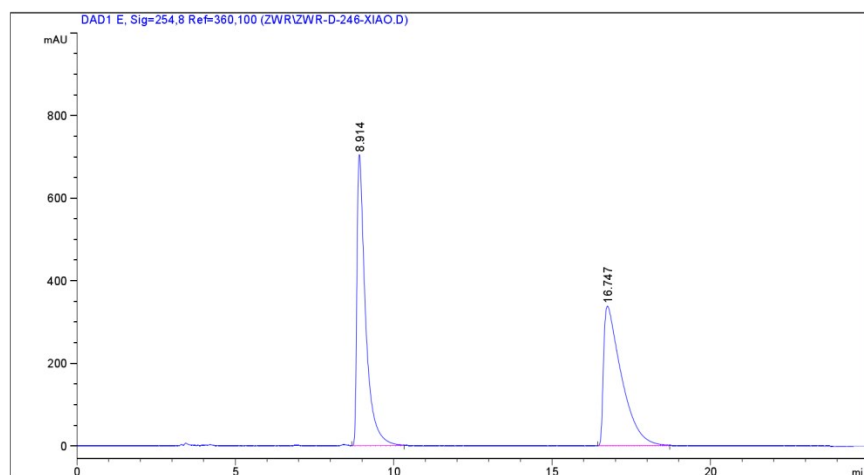

信号 1: DAD1 E, Sig=254,8 Ref=360,100

| 峰 # | 保留时间 [min] | 类型 | 峰宽 [min] | 峰面积 [mAU*s] | 峰高 [mAU]  | 峰面积 %   |
|-----|------------|----|----------|-------------|-----------|---------|
| 1   | 8.914      | VB | 0.2735   | 1.32555e4   | 704.56580 | 49.9670 |
| 2   | 16.747     | BB | 0.5641   | 1.32730e4   | 338.02145 | 50.0330 |

## HPLC spectrum of the chiral compound

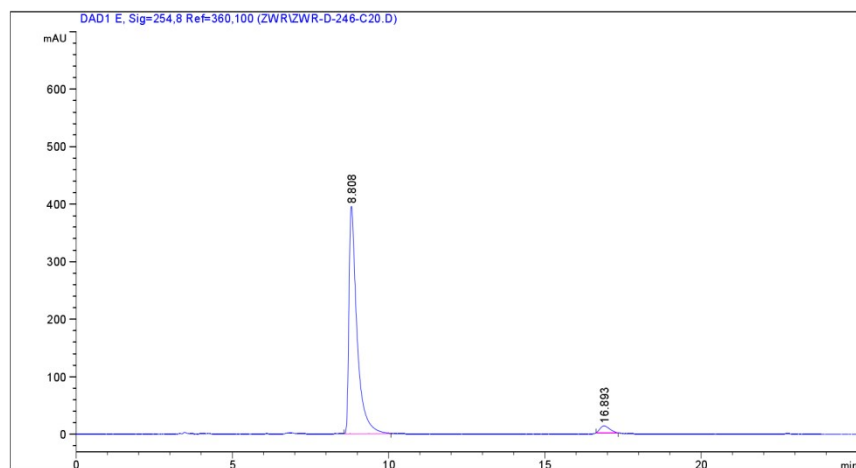

信号 1: DAD1 E, Sig=254,8 Ref=360,100

| 峰 # | 保留时间 [min] | 类型   | 峰宽 [min] | 峰面积 [mAU*s] | 峰高 [mAU]  | 峰面积 %   |
|-----|------------|------|----------|-------------|-----------|---------|
| 1   | 8.808      | BB   | 0.2593   | 7024.94336  | 395.31964 | 96.5529 |
| 2   | 16.893     | MM R | 0.3516   | 250.80075   | 11.88923  | 3.4471  |

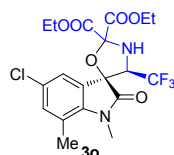

## HPLC spectrum of the racemate

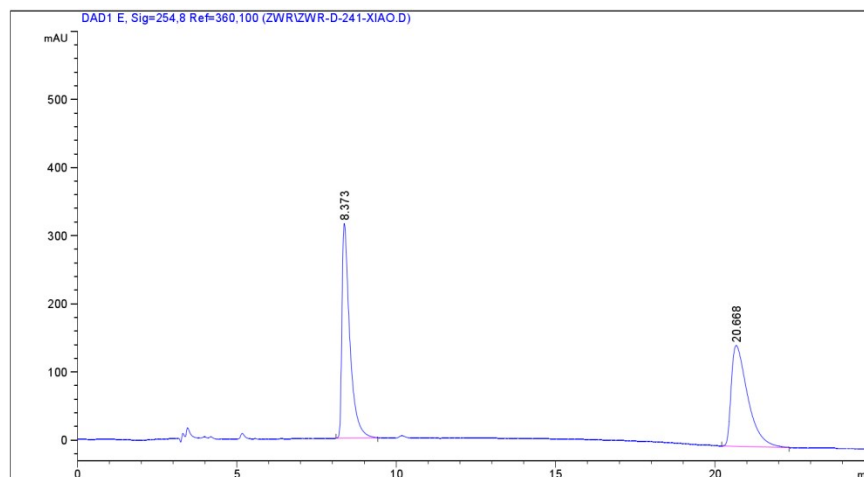

信号 1: DAD1 E, Sig=254,8 Ref=360,100

| 峰 # | 保留时间 [min] | 类型 | 峰宽 [min] | 峰面积 [mAU*s] | 峰高 [mAU]  | 峰面积 %   |
|-----|------------|----|----------|-------------|-----------|---------|
| 1   | 8.373      | BB | 0.2489   | 5375.18066  | 315.21082 | 50.2738 |
| 2   | 20.668     | BB | 0.5452   | 5316.62646  | 147.96509 | 49.7262 |

## HPLC spectrum of the chiral compound

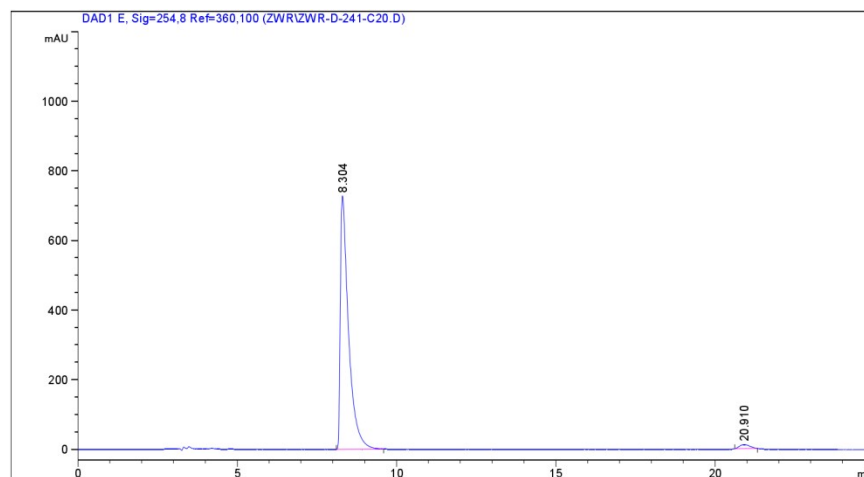

信号 1: DAD1 E, Sig=254,8 Ref=360,100

| 峰 # | 保留时间 [min] | 类型   | 峰宽 [min] | 峰面积 [mAU*s] | 峰高 [mAU]  | 峰面积 %   |
|-----|------------|------|----------|-------------|-----------|---------|
| 1   | 8.304      | BB   | 0.2587   | 1.30323e4   | 728.46429 | 98.0617 |
| 2   | 20.910     | MM R | 0.3743   | 257.59369   | 11.47105  | 1.9383  |

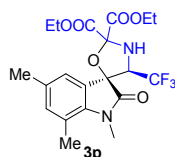

## HPLC spectrum of the racemate

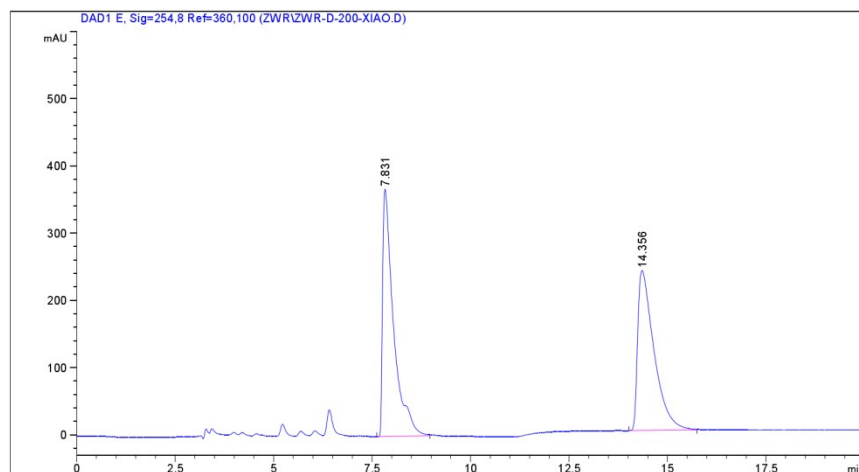

信号 1: DAD1 E, Sig=254,8 Ref=360,100

| 峰 # | 保留时间 [min] | 类型 | 峰宽 [min] | 峰面积 [mAU*s] | 峰高 [mAU]  | 峰面积 %   |
|-----|------------|----|----------|-------------|-----------|---------|
| 1   | 7.831      | BB | 0.2756   | 7113.29248  | 367.81454 | 50.9964 |
| 2   | 14.356     | BB | 0.4229   | 6835.33350  | 238.09776 | 49.0036 |

## HPLC spectrum of the chiral compound

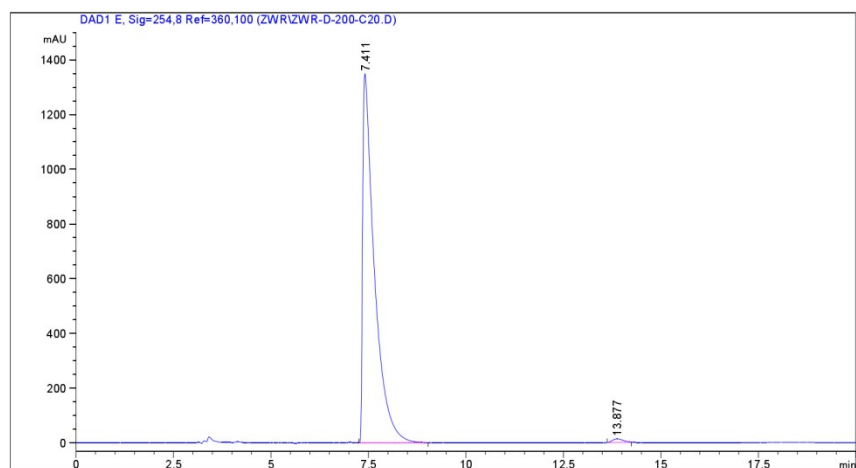

信号 1: DAD1 E, Sig=254,8 Ref=360,100

| 峰 # | 保留时间 [min] | 类型   | 峰宽 [min] | 峰面积 [mAU*s] | 峰高 [mAU]   | 峰面积 %   |
|-----|------------|------|----------|-------------|------------|---------|
| 1   | 7.411      | VB   | 0.2934   | 2.81178e4   | 1347.86340 | 99.1188 |
| 2   | 13.877     | MM R | 0.3172   | 249.97513   | 13.13626   | 0.8812  |

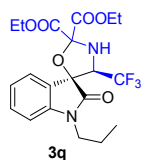

## HPLC spectrum of the racemate

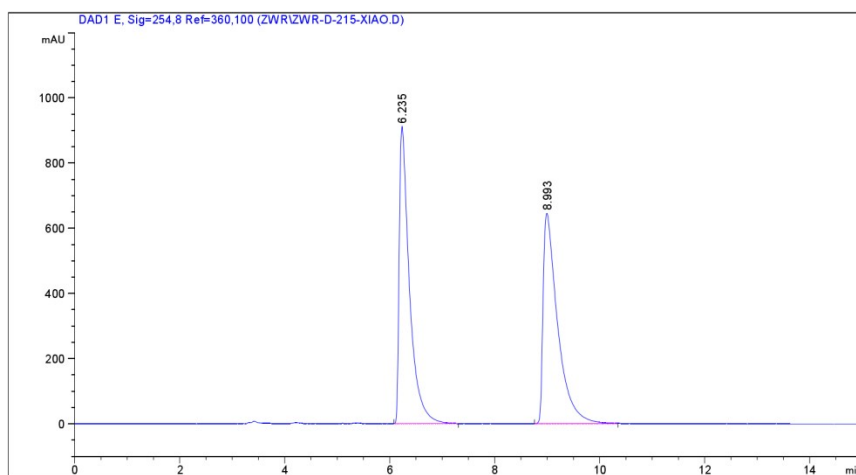

信号 1: DAD1 E, Sig=254,8 Ref=360,100

| 峰 # | 保留时间 [min] | 类型 | 峰宽 [min] | 峰面积 [mAU*s] | 峰高 [mAU]  | 峰面积 %   |
|-----|------------|----|----------|-------------|-----------|---------|
| 1   | 6.235      | BB | 0.1954   | 1.23049e4   | 912.26514 | 49.8460 |
| 2   | 8.893      | BB | 0.2798   | 1.23810e4   | 645.49097 | 50.1540 |

## HPLC spectrum of the chiral compound

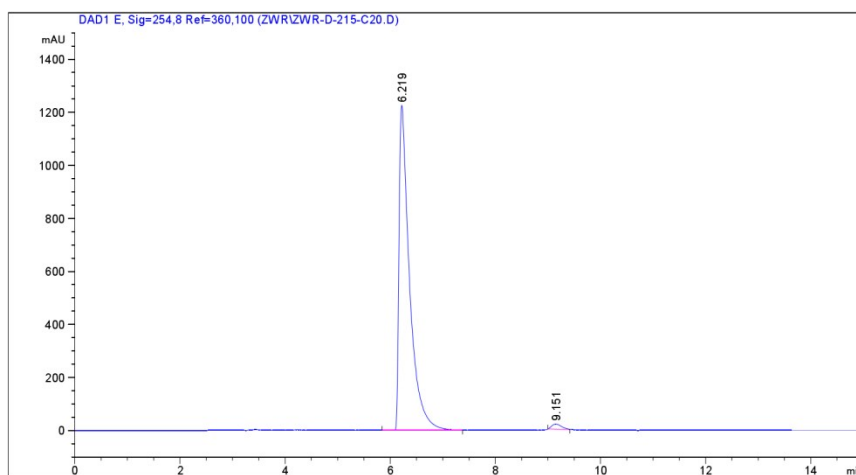

信号 1: DAD1 E, Sig=254,8 Ref=360,100

| 峰 # | 保留时间 [min] | 类型   | 峰宽 [min] | 峰面积 [mAU*s] | 峰高 [mAU]   | 峰面积 %   |
|-----|------------|------|----------|-------------|------------|---------|
| 1   | 6.219      | BB   | 0.1995   | 1.69634e4   | 1225.15601 | 98.5500 |
| 2   | 9.151      | MM R | 0.2155   | 249.59605   | 19.30588   | 1.4500  |

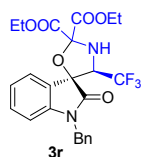

## HPLC spectrum of the racemate

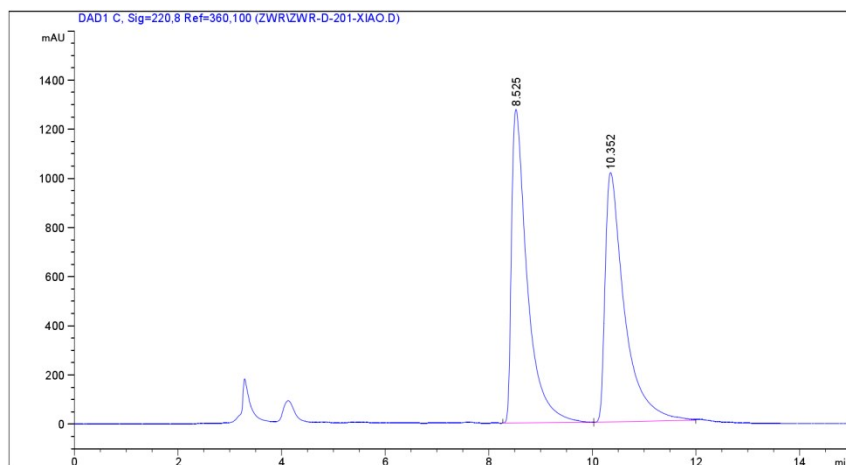

信号 1: DAD1 C, Sig=220,8 Ref=360,100

| 峰 # | 保留时间 [min] | 类型 | 峰宽 [min] | 峰面积 [mAU*s] | 峰高 [mAU]   | 峰面积 %   |
|-----|------------|----|----------|-------------|------------|---------|
| 1   | 8.525      | BV | 0.3074   | 2.68487e4   | 1276.58691 | 50.4776 |
| 2   | 10.352     | VB | 0.3768   | 2.63406e4   | 1014.90851 | 49.5224 |

## HPLC spectrum of the chiral compound

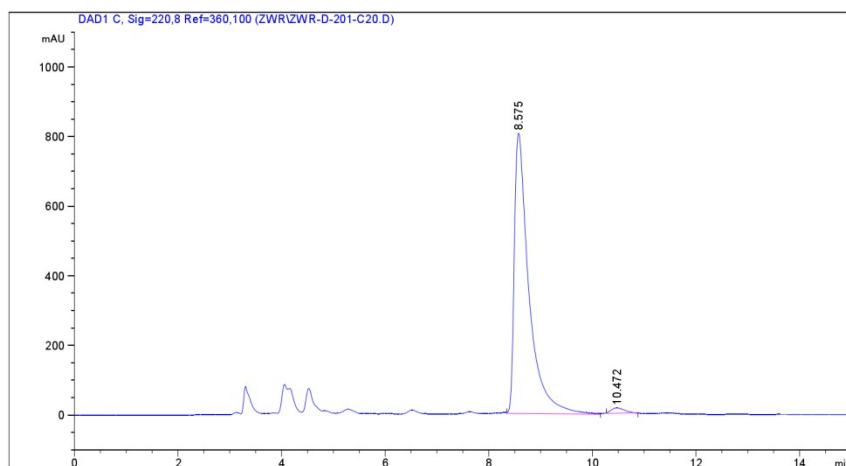

信号 1: DAD1 C, Sig=220,8 Ref=360,100

| 峰 # | 保留时间 [min] | 类型   | 峰宽 [min] | 峰面积 [mAU*s] | 峰高 [mAU]  | 峰面积 %   |
|-----|------------|------|----------|-------------|-----------|---------|
| 1   | 8.575      | MM R | 0.3258   | 1.57537e4   | 805.85107 | 98.3383 |
| 2   | 10.472     | MM R | 0.2899   | 266.20459   | 15.30641  | 1.6617  |

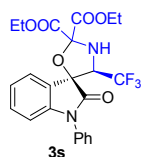

## HPLC spectrum of the racemate

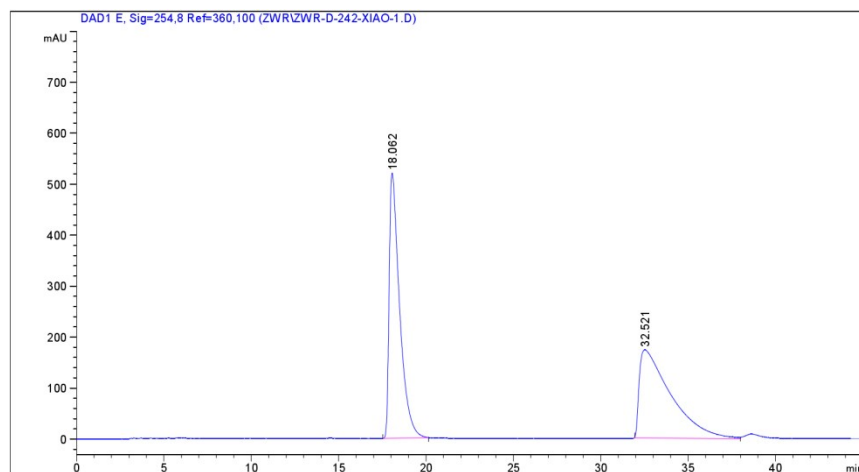

信号 1: DAD1 E, Sig=254,8 Ref=360,100

| 峰 # | 保留时间 [min] | 类型   | 峰宽 [min] | 峰面积 [mAU*s] | 峰高 [mAU]  | 峰面积 %   |
|-----|------------|------|----------|-------------|-----------|---------|
| 1   | 18.062     | BB   | 0.6081   | 2.16007e4   | 520.61768 | 49.8783 |
| 2   | 32.521     | MM R | 2.0904   | 2.17062e4   | 173.06105 | 50.1217 |

## HPLC spectrum of the chiral compound

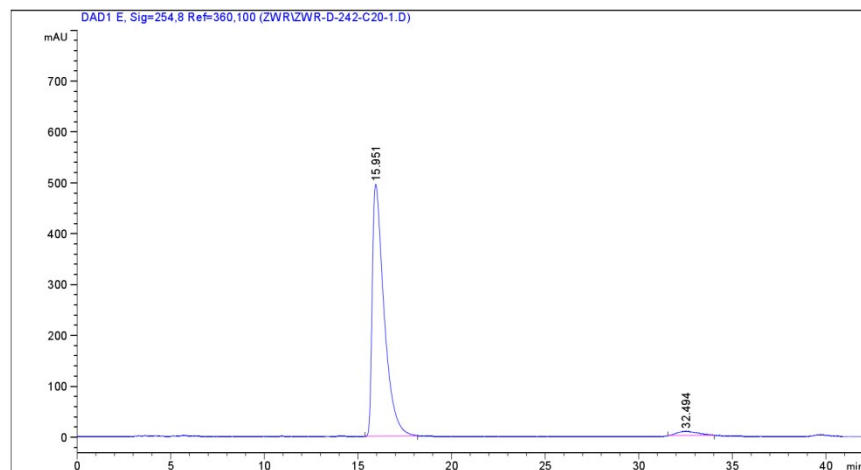

信号 1: DAD1 E, Sig=254,8 Ref=360,100

| 峰 # | 保留时间 [min] | 类型   | 峰宽 [min] | 峰面积 [mAU*s] | 峰高 [mAU]  | 峰面积 %   |
|-----|------------|------|----------|-------------|-----------|---------|
| 1   | 15.951     | BB   | 0.6499   | 2.17413e4   | 495.51501 | 97.2864 |
| 2   | 32.494     | MM R | 1.3283   | 606.43573   | 7.60925   | 2.7136  |



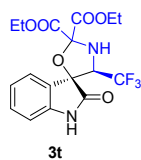

## HPLC spectrum of the racemate

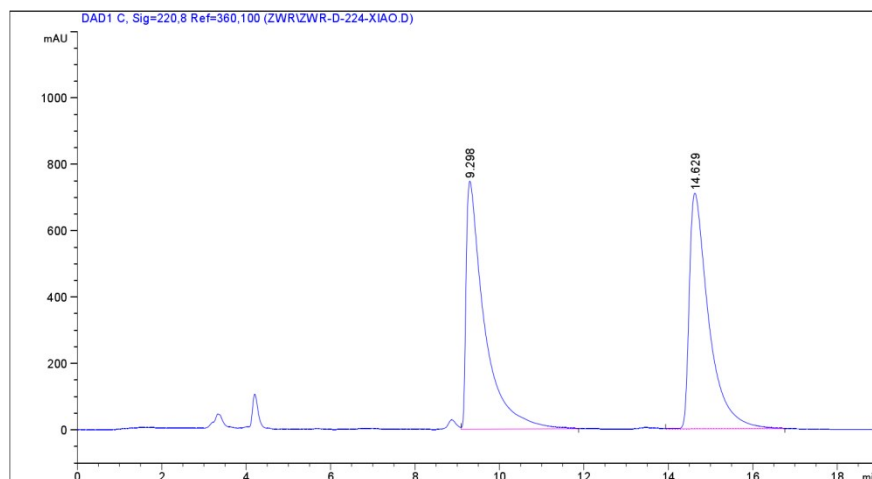

信号 1: DAD1 C, Sig=220,8 Ref=360,100

| 峰 # | 保留时间 [min] | 类型 | 峰宽 [min] | 峰面积 [mAU*s] | 峰高 [mAU]  | 峰面积 %   |
|-----|------------|----|----------|-------------|-----------|---------|
| 1   | 9.298      | VB | 0.4238   | 2.25330e4   | 747.27838 | 49.8165 |
| 2   | 14.629     | VB | 0.4708   | 2.26990e4   | 710.37402 | 50.1835 |

## HPLC spectrum of the chiral compound

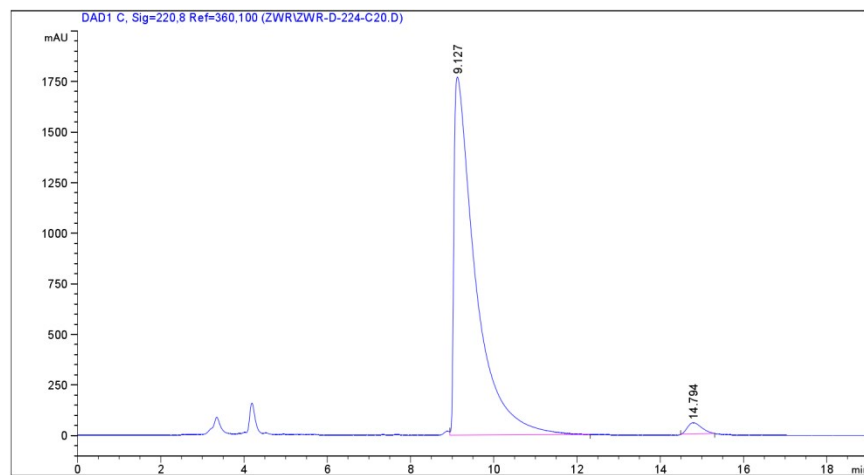

信号 1: DAD1 C, Sig=220,8 Ref=360,100

| 峰 # | 保留时间 [min] | 类型   | 峰宽 [min] | 峰面积 [mAU*s] | 峰高 [mAU]   | 峰面积 %   |
|-----|------------|------|----------|-------------|------------|---------|
| 1   | 9.127      | VB   | 0.5066   | 6.32087e4   | 1770.06873 | 98.0464 |
| 2   | 14.794     | MM R | 0.3839   | 1259.43494  | 54.67139   | 1.9536  |

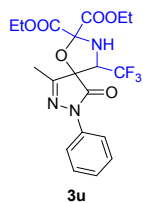

## HPLC spectrum of the racemate

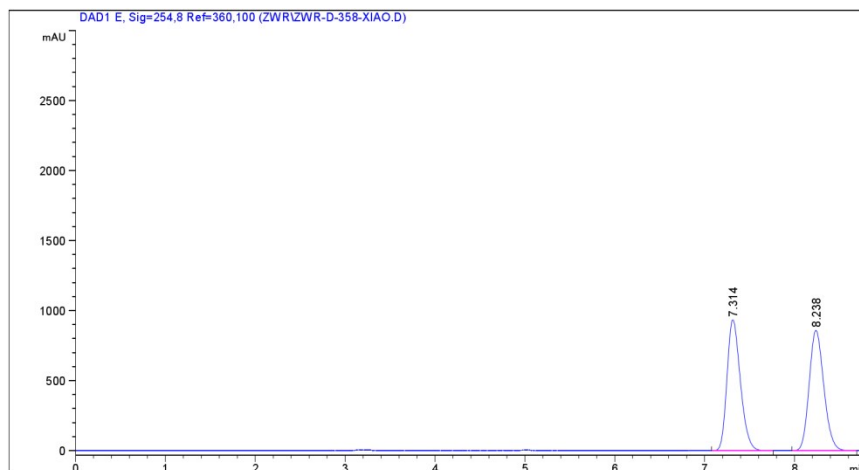

信号 1: DAD1 E, Sig=254,8 Ref=360,100

| 峰 # | 保留时间 [min] | 类型 | 峰宽 [min] | 峰面积 [mAU*s] | 峰高 [mAU]  | 峰面积 %   |
|-----|------------|----|----------|-------------|-----------|---------|
| 1   | 7.314      | BB | 0.1605   | 9657.23828  | 935.30853 | 49.8554 |
| 2   | 8.238      | BB | 0.1740   | 9713.27539  | 858.48425 | 50.1446 |

## HPLC spectrum of the chiral compound

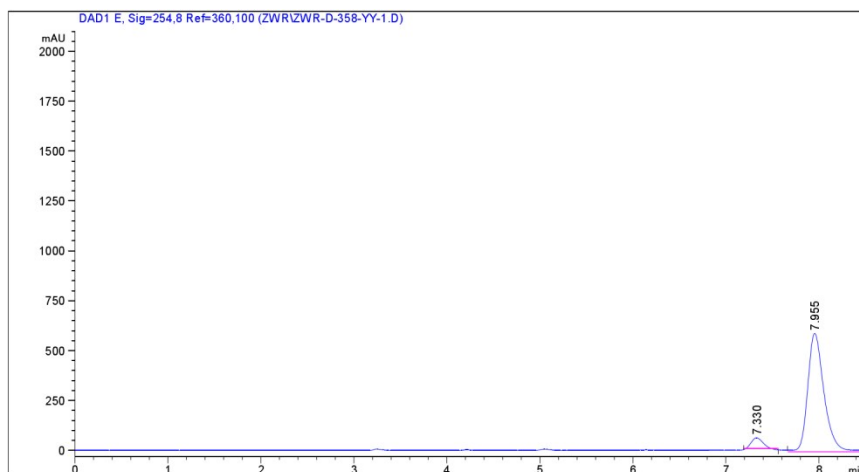

信号 1: DAD1 E, Sig=254,8 Ref=360,100

| 峰 # | 保留时间 [min] | 类型   | 峰宽 [min] | 峰面积 [mAU*s] | 峰高 [mAU]  | 峰面积 %   |
|-----|------------|------|----------|-------------|-----------|---------|
| 1   | 7.330      | MM R | 0.1362   | 424.31387   | 51.93313  | 4.9522  |
| 2   | 7.955      | MM R | 0.2277   | 8143.83301  | 596.21027 | 95.0478 |

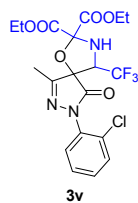

## HPLC spectrum of the racemate

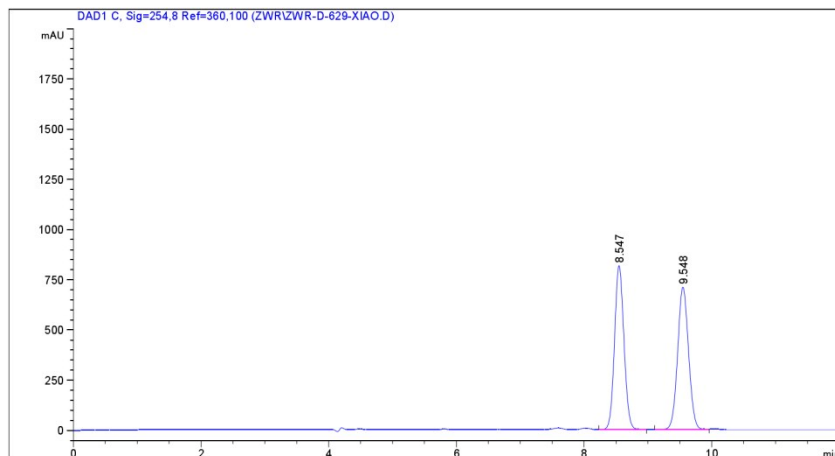

信号 1: DAD1 C, Sig=254,8 Ref=360,100

| 峰 # | 保留时间 [min] | 类型 | 峰宽 [min] | 峰面积 [mAU*s] | 峰高 [mAU]  | 峰面积 %   |
|-----|------------|----|----------|-------------|-----------|---------|
| 1   | 8.547      | VB | 0.1594   | 8348.12402  | 815.76562 | 49.7739 |
| 2   | 9.548      | BB | 0.1826   | 8423.97754  | 709.18329 | 50.2261 |

## HPLC spectrum of the chiral compound

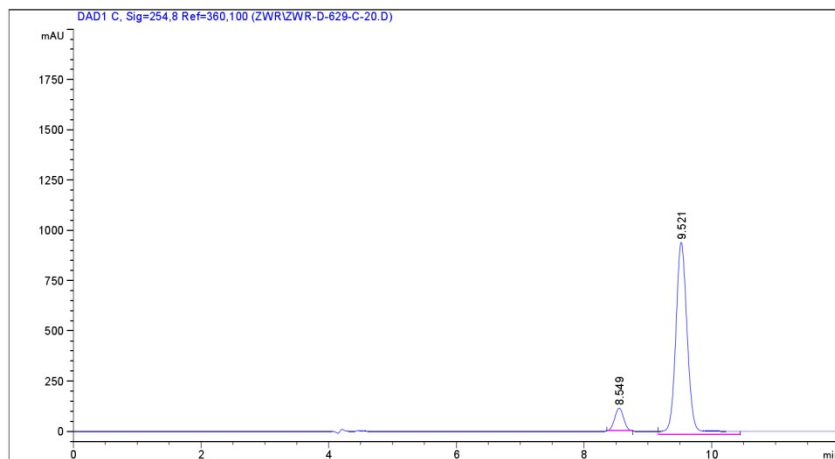

信号 1: DAD1 C, Sig=254,8 Ref=360,100

| 峰 # | 保留时间 [min] | 类型   | 峰宽 [min] | 峰面积 [mAU*s] | 峰高 [mAU]  | 峰面积 %   |
|-----|------------|------|----------|-------------|-----------|---------|
| 1   | 8.549      | MM R | 0.1558   | 1026.55884  | 109.82549 | 7.6213  |
| 2   | 9.521      | MM R | 0.2168   | 1.24431e4   | 956.64935 | 92.3787 |

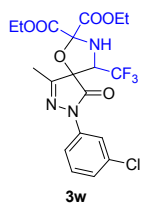

### HPLC spectrum of the racemate

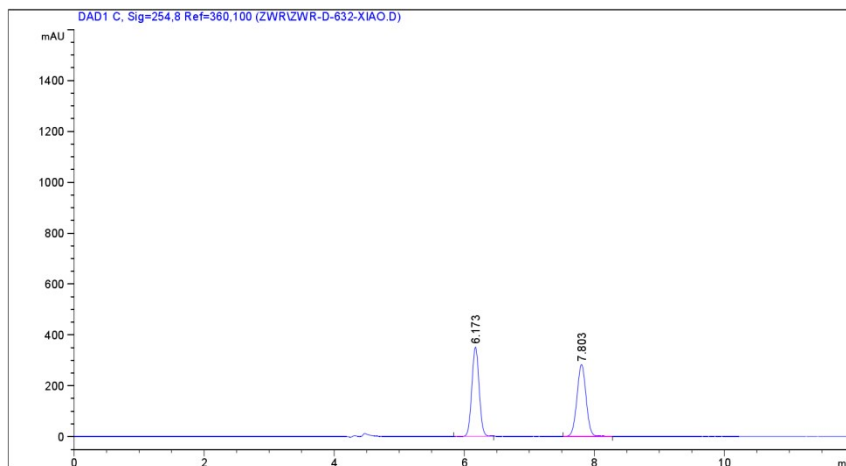

信号 1: DAD1 C, Sig=254,8 Ref=360,100

| 峰 # | 保留时间 [min] | 类型 | 峰宽 [min] | 峰面积 [mAU*s] | 峰高 [mAU]  | 峰面积 %   |
|-----|------------|----|----------|-------------|-----------|---------|
| 1   | 6.173      | BB | 0.1213   | 2748.66260  | 351.37128 | 49.7521 |
| 2   | 7.803      | BB | 0.1526   | 2776.05127  | 282.67242 | 50.2479 |

### HPLC spectrum of the chiral compound

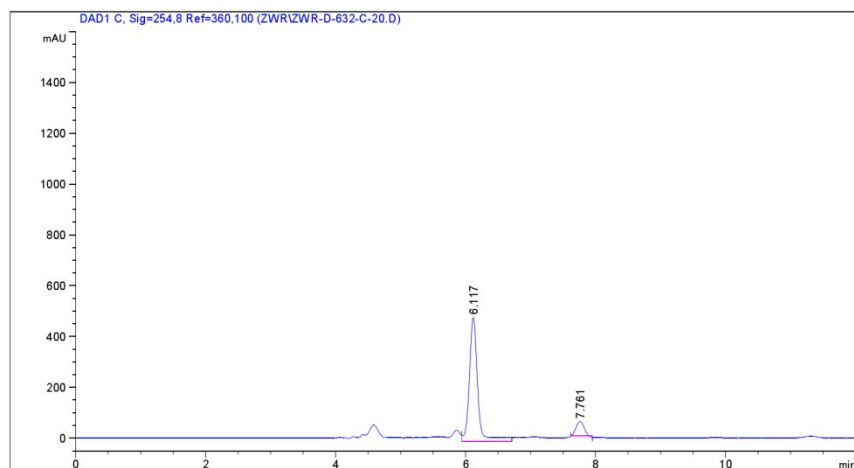

信号 1: DAD1 C, Sig=254,8 Ref=360,100

| 峰 # | 保留时间 [min] | 类型   | 峰宽 [min] | 峰面积 [mAU*s] | 峰高 [mAU]  | 峰面积 %   |
|-----|------------|------|----------|-------------|-----------|---------|
| 1   | 6.117      | MM R | 0.1524   | 4474.48877  | 489.22321 | 90.0975 |
| 2   | 7.761      | MM R | 0.1424   | 491.78622   | 57.54036  | 9.9025  |

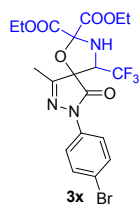

## HPLC spectrum of the racemate

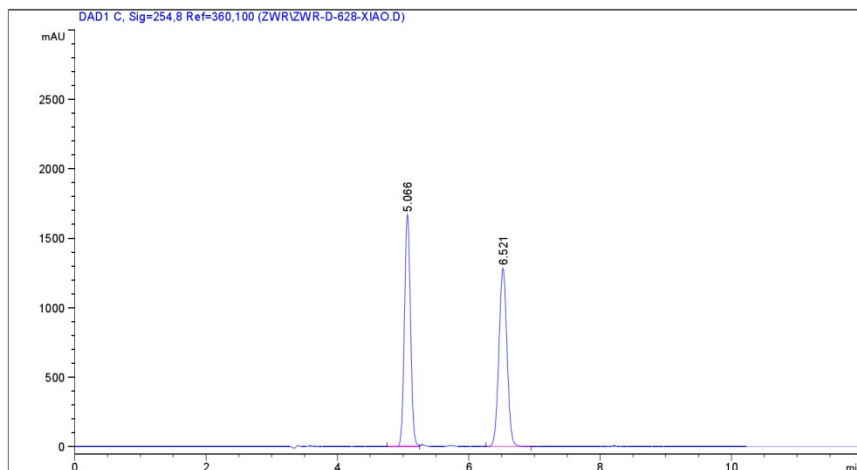

信号 1: DAD1 C, Sig=254,8 Ref=360,100

| 峰 # | 保留时间 [min] | 类型 | 峰宽 [min] | 峰面积 [mAU*s] | 峰高 [mAU]   | 峰面积 %   |
|-----|------------|----|----------|-------------|------------|---------|
| 1   | 5.066      | VV | 0.1010   | 1.07297e4   | 1669.82471 | 49.3265 |
| 2   | 6.521      | VB | 0.1341   | 1.10227e4   | 1284.40063 | 50.6735 |

## HPLC spectrum of the chiral compound

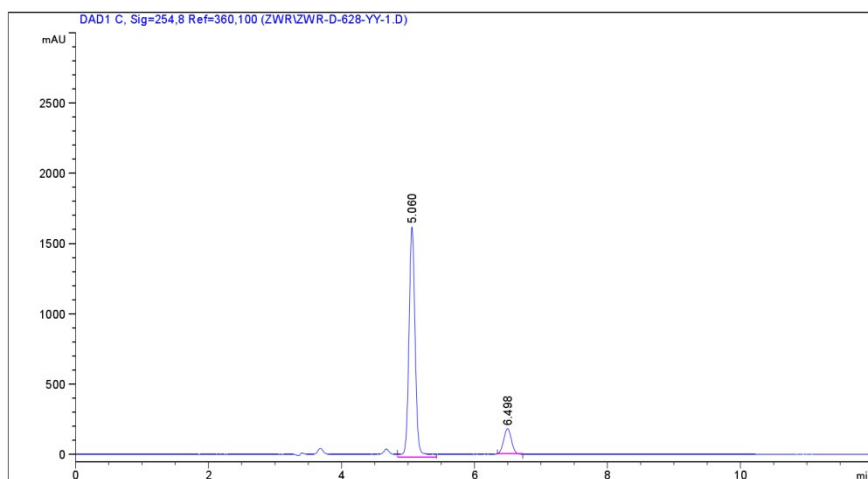

信号 1: DAD1 C, Sig=254,8 Ref=360,100

| 峰 # | 保留时间 [min] | 类型   | 峰宽 [min] | 峰面积 [mAU*s] | 峰高 [mAU]   | 峰面积 %   |
|-----|------------|------|----------|-------------|------------|---------|
| 1   | 5.060      | MM R | 0.1081   | 1.06276e4   | 1638.56396 | 88.5926 |
| 2   | 6.498      | MM R | 0.1295   | 1368.43567  | 176.05740  | 11.4074 |

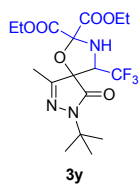

## HPLC spectrum of the racemate

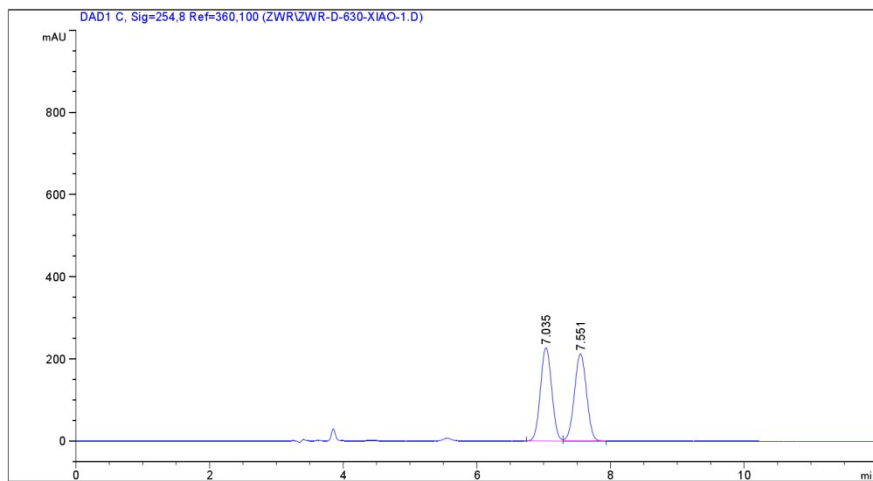

信号 1: DAD1 C, Sig=254,8 Ref=360,100

| 峰 # | 保留时间 [min] | 类型 | 峰宽 [min] | 峰面积 [mAU*s] | 峰高 [mAU]  | 峰面积 %   |
|-----|------------|----|----------|-------------|-----------|---------|
| 1   | 7.035      | BV | 0.1851   | 2673.10693  | 227.48076 | 49.9695 |
| 2   | 7.551      | VB | 0.1991   | 2676.37085  | 212.26019 | 50.0305 |

## HPLC spectrum of the chiral compound

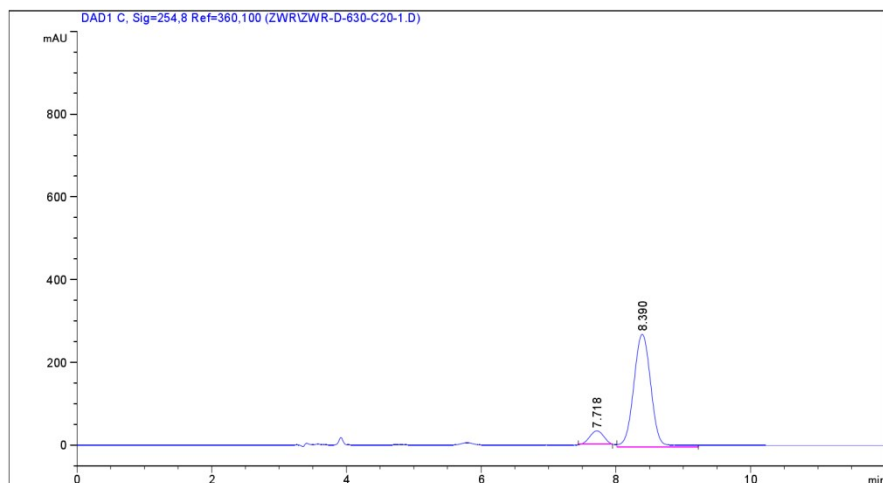

信号 1: DAD1 C, Sig=254,8 Ref=360,100

| 峰 # | 保留时间 [min] | 类型   | 峰宽 [min] | 峰面积 [mAU*s] | 峰高 [mAU]  | 峰面积 %   |
|-----|------------|------|----------|-------------|-----------|---------|
| 1   | 7.718      | MM R | 0.2390   | 468.76962   | 32.68374  | 8.8518  |
| 2   | 8.390      | MM R | 0.2959   | 4826.97900  | 271.85806 | 91.1482 |

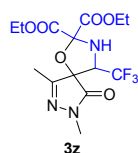

## HPLC spectrum of the racemate

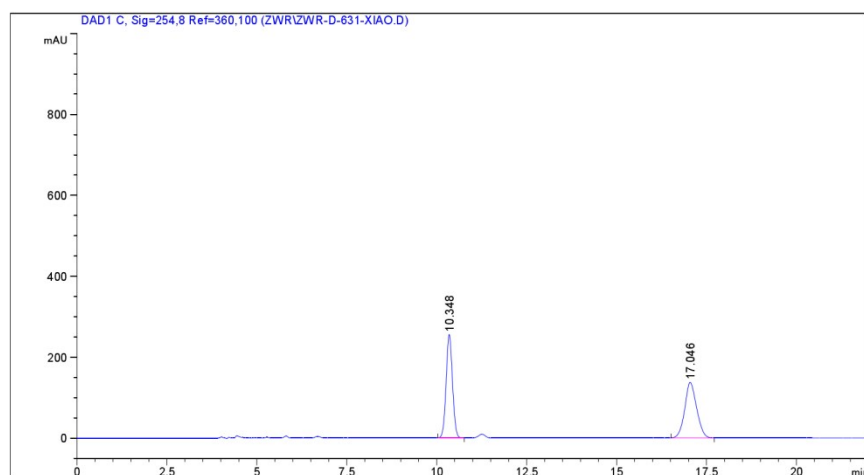

信号 1: DAD1 C, Sig=254,8 Ref=360,100

| 峰 # | 保留时间 [min] | 类型 | 峰宽 [min] | 峰面积 [mAU*s] | 峰高 [mAU]  | 峰面积 %   |
|-----|------------|----|----------|-------------|-----------|---------|
| 1   | 10.348     | BB | 0.1895   | 3144.93726  | 255.71109 | 49.9660 |
| 2   | 17.046     | BB | 0.3476   | 3149.22119  | 137.30154 | 50.0340 |

## HPLC spectrum of the chiral compound

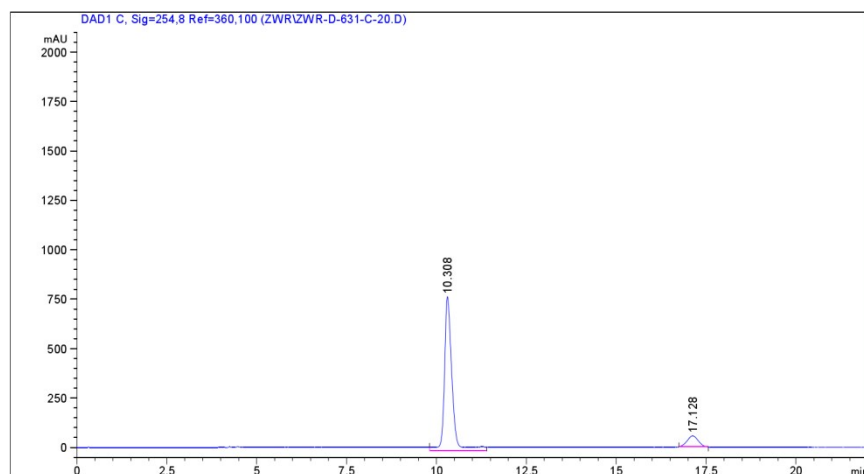

信号 1: DAD1 C, Sig=254,8 Ref=360,100

| 峰 # | 保留时间 [min] | 类型   | 峰宽 [min] | 峰面积 [mAU*s] | 峰高 [mAU]  | 峰面积 %   |
|-----|------------|------|----------|-------------|-----------|---------|
| 1   | 10.308     | MM R | 0.2476   | 1.15707e4   | 778.83331 | 91.6262 |
| 2   | 17.128     | MM R | 0.3338   | 1057.45215  | 52.79362  | 8.3738  |

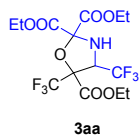

## HPLC spectrum of the racemate

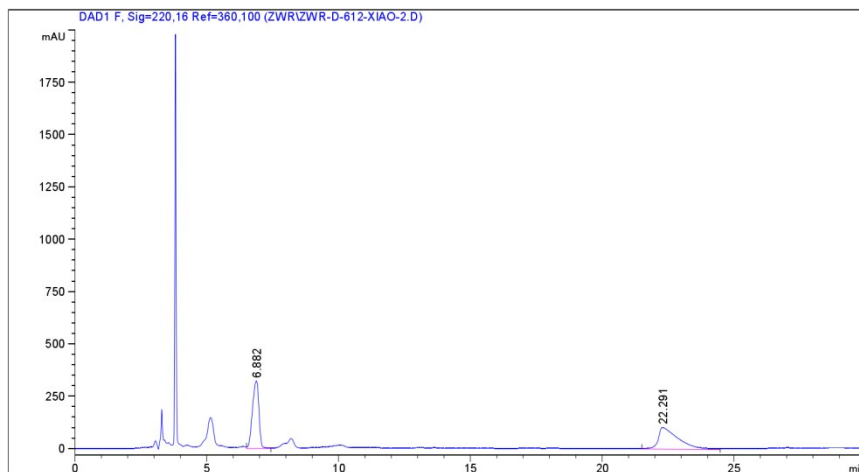

信号 1: DAD1 F, Sig=220,16 Ref=360,100

| 峰 # | 保留时间 [min] | 类型   | 峰宽 [min] | 峰面积 [mAU*s] | 峰高 [mAU]  | 峰面积 %   |
|-----|------------|------|----------|-------------|-----------|---------|
| 1   | 6.882      | VB   | 0.2808   | 5505.06934  | 323.07227 | 49.8763 |
| 2   | 22.291     | MM R | 0.8889   | 5532.37598  | 103.73302 | 50.1237 |

## HPLC spectrum of the chiral compound

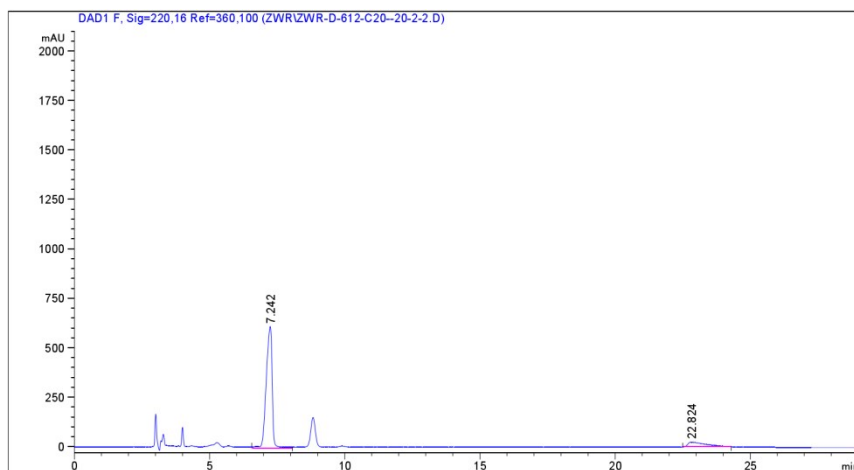

信号 1: DAD1 F, Sig=220,16 Ref=360,100

| 峰 # | 保留时间 [min] | 类型   | 峰宽 [min] | 峰面积 [mAU*s] | 峰高 [mAU]  | 峰面积 %   |
|-----|------------|------|----------|-------------|-----------|---------|
| 1   | 7.242      | MM R | 0.2558   | 9466.18164  | 616.73773 | 90.0572 |
| 2   | 22.824     | MM R | 0.7582   | 1045.11938  | 22.97465  | 9.9428  |



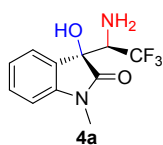

## HPLC spectrum of the racemate

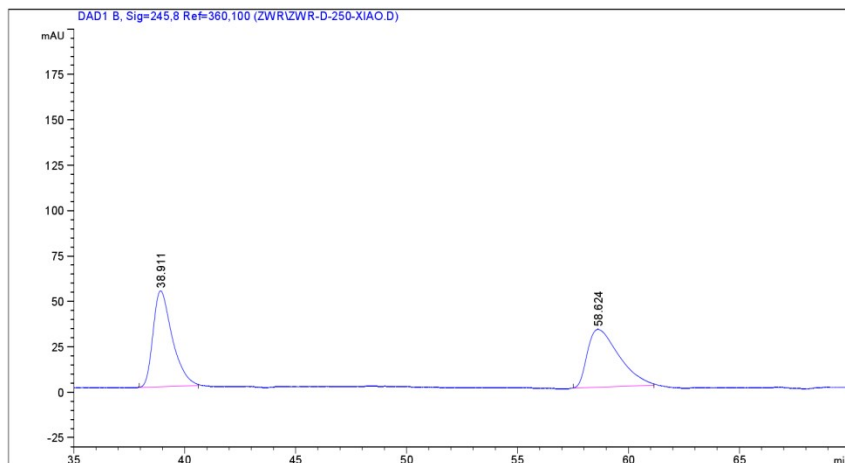

信号 1: DAD1 B, Sig=245,8 Ref=360,100

| 峰 # | 保留时间 [min] | 类型 | 峰宽 [min] | 峰面积 [mAU*s] | 峰高 [mAU] | 峰面积 %   |
|-----|------------|----|----------|-------------|----------|---------|
| 1   | 38.911     | BB | 0.8958   | 3177.13989  | 52.81759 | 50.2385 |
| 2   | 58.624     | BB | 1.3358   | 3146.97388  | 31.87579 | 49.7615 |

## HPLC spectrum of the chiral compound

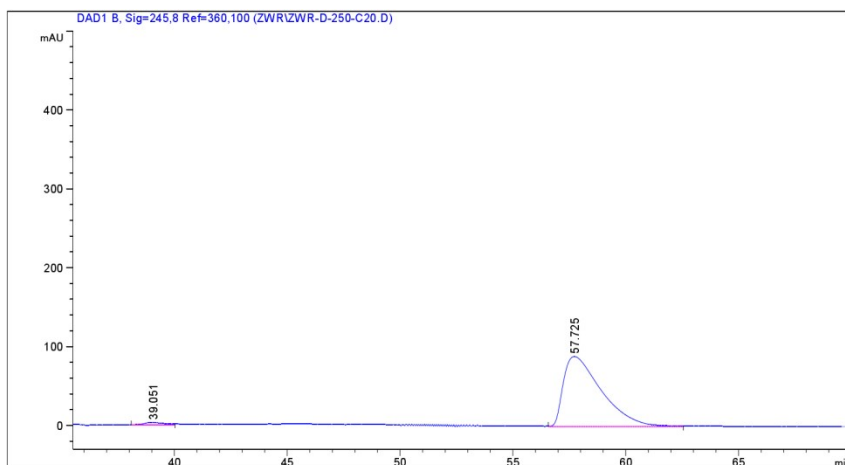

信号 1: DAD1 B, Sig=245,8 Ref=360,100

| 峰 # | 保留时间 [min] | 类型   | 峰宽 [min] | 峰面积 [mAU*s] | 峰高 [mAU] | 峰面积 %   |
|-----|------------|------|----------|-------------|----------|---------|
| 1   | 39.051     | MM R | 1.0838   | 183.21825   | 2.81752  | 1.7304  |
| 2   | 57.725     | MM R | 1.9515   | 1.04049e4   | 88.86322 | 98.2696 |

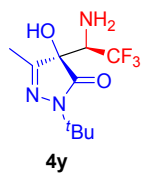

## HPLC spectrum of the racemate

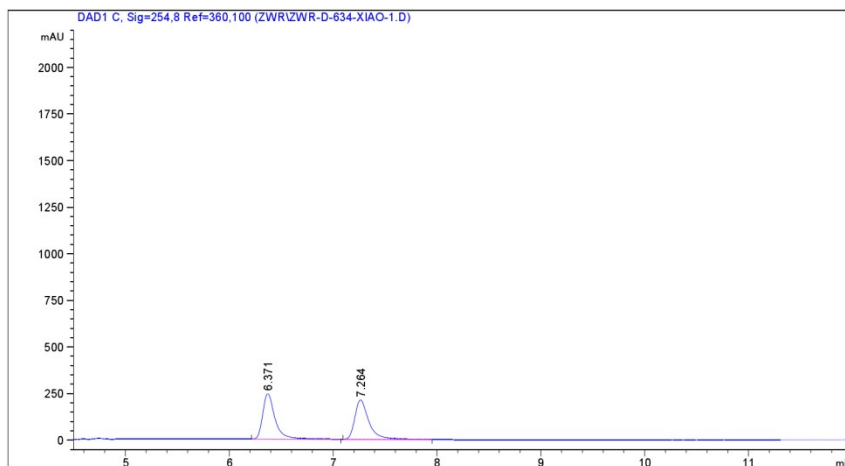

信号 1: DAD1 C, Sig=254,8 Ref=360,100

| 峰 # | 保留时间 [min] | 类型 | 峰宽 [min] | 峰面积 [mAU*s] | 峰高 [mAU]  | 峰面积 %   |
|-----|------------|----|----------|-------------|-----------|---------|
| 1   | 6.371      | BB | 0.1248   | 2023.93164  | 243.85034 | 50.4573 |
| 2   | 7.264      | BB | 0.1417   | 1987.24854  | 211.37042 | 49.5427 |

## HPLC spectrum of the chiral compound

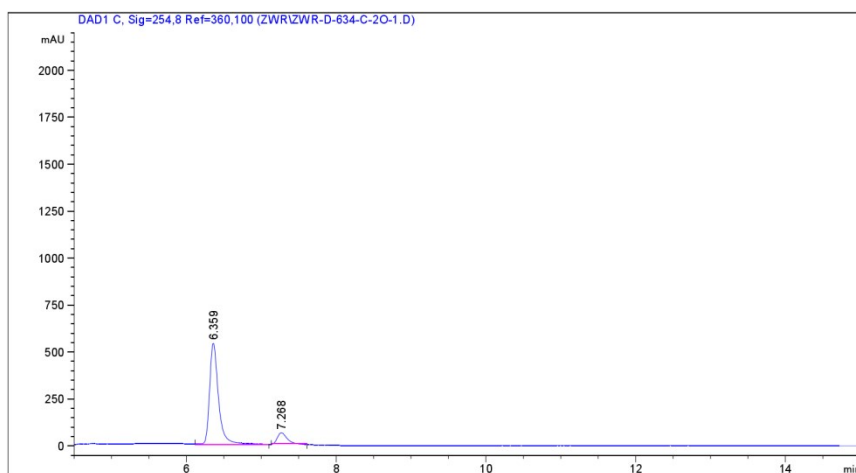

信号 1: DAD1 C, Sig=254,8 Ref=360,100

| 峰 # | 保留时间 [min] | 类型   | 峰宽 [min] | 峰面积 [mAU*s] | 峰高 [mAU]  | 峰面积 %   |
|-----|------------|------|----------|-------------|-----------|---------|
| 1   | 6.359      | MM R | 0.1412   | 4592.78516  | 542.20740 | 90.1742 |
| 2   | 7.268      | MM R | 0.1411   | 500.44873   | 59.10970  | 9.8258  |
